# Supplementary material for: A gridded dataset of consumptive water footprints, evaporation, transpiration, and associated benchmarks related to crop production in China during 2000–2018
Source: Copernicus journal article supplement (doi:10.5194/essd-2023-102), 2023-04-13
Supplement: Supplementary file 1 [file essd-2023-102-supplement.pdf]

*Supplement of*

**A gridded dataset of consumptive water footprints, evaporation,  
transpiration, and associated benchmarks related to crop production in  
China during 2000-2018**

**Wei Wang et al.**

*Correspondence to:* La Zhuo (zhuola@nwafu.edu.cn lzhuo@ms.iswc.ac.cn), Pute Wu ([gjzwpt@vip.sina.com](mailto:gjzwpt@vip.sina.com)).

The copyright of individual parts of the supplement might differ from the article license.

# Contents

|                                                                                                                                                                               |          |
|-------------------------------------------------------------------------------------------------------------------------------------------------------------------------------|----------|
| <b>Supplementary Tables .....</b>                                                                                                                                             | <b>1</b> |
| Table S1. Benchmarks for the uWFCP at different production percentiles of 21 crops under various water supply and irrigation practices ( $\text{m}^3 \text{ ton}^{-1}$ )..... | 1        |
| <b>Supplementary Figures.....</b>                                                                                                                                             | <b>3</b> |
| Fig. S1 The WFCP (a), WFCPg (b), WFCPb (c) of 21 crops, and total WFCP under different water supply and irrigation practices (d).....                                         | 3        |
| Fig. S2 Total national monthly WFCPg and WFCPb in soil evaporation (cross filling represents WFCPg, dot filling indicates WFCPb). .....                                       | 4        |
| Fig. S3 Total national monthly WFCPg and WFCPb in crop transpiration (cross filling represents WFCPg, dot filling indicates WFCPb). .....                                     | 5        |
| Fig. S4 Gridded WFCPb and WFCPg in 2017.....                                                                                                                                  | 6        |
| Fig. S5 Gridded WFCPg and WFCPg in 2017.....                                                                                                                                  | 7        |
| Fig. S6 Gridded monthly total WFCP (a), WFCPb (b) and WFCPg (c) of 21crops in furrow irrigation in 2017. ....                                                                 | 8        |
| Fig. S7 Gridded monthly total WFCP (a), WFCPb (b) and WFCPg (c) of 21crops in micro irrigation in 2017. ....                                                                  | 9        |
| Fig. S8 Gridded monthly total WFCP (a), WFCPb (b) and WFCPg (c) of 21crops in sprinkler irrigation in 2017.....                                                               | 10       |
| Fig. S9 Gridded monthly total WFCP in rain-fed conditions in 2017.....                                                                                                        | 11       |
| Fig. S10 Gridded monthly total WFCP, WFCPb and WFCPg in furrow irrigation (a), micro irrigation (b), sprinkler irrigation (c) and rain-fed conditions (d) in 2017.....        | 11       |
| Fig. S11 Gridded WFCPb in soil evaporation in 2017.....                                                                                                                       | 12       |
| Fig. S12 Gridded WFCPg in soil evaporation in 2017.....                                                                                                                       | 13       |
| Fig. S13 Gridded WFCPb in soil crop transpiration in 2017. ....                                                                                                               | 14       |
| Fig. S14 Gridded WFCPg in soil crop transpiration in 2017. ....                                                                                                               | 15       |
| Fig. S15 Interannual variation in uWFCPb, uWFCPg and yield under different water supply and irrigation practices over 2000-2018. ....                                         | 18       |
| Fig. S16 Proportion of blue and green water consumption for soil evaporation and crop transpiration under different water supply and irrigation practices. ....               | 19       |
| Fig. S17 Gridded uWFCPb (annual average for 2010-2018).....                                                                                                                   | 20       |
| Fig. S18 Gridded uWFCPg (annual average for 2010-2018).....                                                                                                                   | 21       |
| Fig. S19 Relative changes of the average gridded uWFCP for 2000-2009 to that for 2010-2018.....                                                                               | 22       |
| Fig. S20 Relative changes of the average gridded uWFCPb for 2000-2009 to that for 2010-2018.....                                                                              | 23       |
| Fig. S21 Relative changes of the average gridded uWFCPg for 2000-2009 to that for 2010-2018.....                                                                              | 24       |

|                                                                                                                                                        |    |
|--------------------------------------------------------------------------------------------------------------------------------------------------------|----|
| Fig. S22 Gridded uWFCPb (annual average for 2010-2018).....                                                                                            | 28 |
| Fig. S23 Gridded uWFCPg (annual average for 2010-2018).....                                                                                            | 32 |
| Fig. S24 Relative changes of the average gridded uWFCPb under different water supply and irrigation practices for 2000-2009 to that for 2010-2018..... | 36 |
| Fig. S25 Relative changes of the average gridded uWFCPg under different water supply and irrigation practices for 2000-2009 to that for 2010-2018..... | 40 |
| Fig. S26 Benchmarks for the uWFCP at different production percentiles under micro irrigation in China by 2018.....                                     | 41 |
| Fig. S27 Benchmarks for the uWFCP at different production percentiles under sprinkler irrigation in China by 2018.....                                 | 42 |
| Fig. S28 Benchmarks for the uWFCP at different production percentiles under rain-fed conditions in China by 2018.....                                  | 43 |

## Supplementary Table

**Table S1. Benchmarks for the uWFCP at different production percentiles of 21 crops under various water supply and irrigation practices (m<sup>3</sup> ton<sup>-1</sup>)**

| Crop           | Climate zones | Furrow irrigation |          |          | Micro irrigation |           |           | Sprinkler irrigation |          |          | Rain-fed |          |          |
|----------------|---------------|-------------------|----------|----------|------------------|-----------|-----------|----------------------|----------|----------|----------|----------|----------|
|                |               | 10th              | 20th     | 25th     | 10th             | 20th      | 25th      | 10th                 | 20th     | 25th     | 10th     | 20th     | 25th     |
| Wheat          | Humid         | 859±92            | 889±96   | 901±98   | 846±94           | 903±87    | 918±87    | 894±104              | 932±112  | 958±120  | 844±108  | 924±121  | 966±120  |
|                | Arid          | 854±56            | 959±62   | 1002±67  | 731±61           | 770±76    | 789±80    | 984±59               | 1107±97  | 1120±100 | 832±140  | 1010±129 | 1042±126 |
| Maize          | Humid         | 747±68            | 804±56   | 826±53   | 664±111          | 716±94    | 746±83    | 738±93               | 782±92   | 803±91   | 676±68   | 718±61   | 737±58   |
|                | Arid          | 657±155           | 714±142  | 731±143  | 560±138          | 576±144   | 582±145   | 738±151              | 763±161  | 772±165  | 691±139  | 750±141  | 775±140  |
| Early rice     | Humid         | 544±36            | 566±35   | 578±34   | –                | –         | –         | 558±33               | 581±33   | 589±34   | –        | –        | –        |
|                | Arid          | –                 | –        | –        | –                | –         | –         | –                    | –        | –        | –        | –        | –        |
| Mid rice       | Humid         | 629±25            | 660±30   | 673±33   | –                | –         | –         | 608±26               | 632±27   | 642±28   | –        | –        | –        |
|                | Arid          | 755±50            | 798±63   | 814±66   | –                | –         | –         | 728±28               | 758±28   | 781±36   | –        | –        | –        |
| Late rice      | Humid         | 672±34            | 701±34   | 712±35   | –                | –         | –         | 660±36               | 698±38   | 710±41   | –        | –        | –        |
|                | Arid          | –                 | –        | –        | –                | –         | –         | –                    | –        | –        | –        | –        | –        |
| Sorghum        | Humid         | 1061±149          | 1147±176 | 1181±190 | 1076±200         | 1144±230  | 1178±250  | 1156±248             | 1218±281 | 1275±301 | 616±117  | 653±129  | 690±153  |
|                | Arid          | 1022±187          | 1121±177 | 1183±166 | 743±201          | 802±236   | 826±252   | 1180±207             | 1317±257 | 1408±250 | 704±184  | 772±234  | 802±240  |
| Millet         | Humid         | 1166±337          | 1303±351 | 1398±316 | 1342±223         | 1436±227  | 1463±225  | 1225±316             | 1363±380 | 1418±414 | 1284±377 | 1472±307 | 1515±293 |
|                | Arid          | 1446±516          | 1712±502 | 1767±478 | 1521±523         | 1635±570  | 1674±580  | 1501±540             | 1770±593 | 1847±594 | 1557±371 | 1650±394 | 1705±396 |
| Barley         | Humid         | 622±94            | 661±96   | 687±87   | 480±55           | 524±61    | 550±67    | 632±110              | 703±105  | 736±92   | 490±66   | 576±80   | 615±78   |
|                | Arid          | 504±34            | 579±82   | 601±93   | 544±102          | 579±106   | 591±106   | 563±101              | 625±125  | 649±144  | 444±55   | 498±87   | 568±166  |
| Soybean        | Humid         | 1855±98           | 2032±74  | 2098±84  | 1890±197         | 2000±200  | 2068±170  | 1834±255             | 2008±251 | 2103±220 | 1868±154 | 2056±172 | 2105±188 |
|                | Arid          | 2214±162          | 2362±174 | 2420±181 | 2101±277         | 2186±287  | 2218±290  | 2239±357             | 2420±277 | 2496±243 | 2431±343 | 2696±335 | 2802±329 |
| Potatoes       | Humid         | 153±42            | 218±75   | 248±79   | 133±56           | 169±62    | 184±68    | 175±51               | 220±72   | 238±67   | 400±144  | 763±137  | 905±103  |
|                | Arid          | 126±17            | 142±24   | 145±24   | 143±41           | 267±275   | 339±335   | 141±26               | 145±25   | 147±26   | 786±166  | 994±231  | 1102±258 |
| Sweet potatoes | Humid         | 858±127           | 944±90   | 981±93   | 831±150          | 921±124   | 949±124   | 845±158              | 957±139  | 986±138  | 952±86   | 1055±45  | 1086±39  |
|                | Arid          | 1061±161          | 1211±178 | 1235±185 | 749±203          | 787±217   | 833±245   | 879±137              | 980±134  | 1008±127 | 1156±175 | 1283±234 | 1331±248 |
| Cotton         | Humid         | 4663±412          | 5307±494 | 5704±506 | 2266±1579        | 3225±2113 | 4108±1584 | 5356±760             | 6235±586 | 6394±619 | 4457±458 | 4837±395 | 4969±369 |
|                | Arid          | 1704±306          | 1713±309 | 1728±308 | 1582±283         | 1588±287  | 1592±287  | 1758±316             | 1772±316 | 1788±320 | 1309±238 | 1415±253 | 1465±257 |

| Crop        | Climate zones | Furrow irrigation |            |            | Micro irrigation |            |            | Sprinkler irrigation |             |             | Rain-fed  |           |           |
|-------------|---------------|-------------------|------------|------------|------------------|------------|------------|----------------------|-------------|-------------|-----------|-----------|-----------|
|             |               | 10th              | 20th       | 25th       | 10th             | 20th       | 25th       | 10th                 | 20th        | 25th        | 10th      | 20th      | 25th      |
| Sugar cane  | Humid         | 26±2              | 27±2       | 29±3       | 29±4             | 33±11      | 37±16      | 27±3                 | 31±4        | 32±5        | 109±9     | 115±10    | 118±9     |
|             | Arid          | 360±172           | 364±173    | 364±173    | 345±165          | 349±165    | 349±165    | 368±177              | 372±177     | 372±177     | –         | –         | –         |
| Sugar beets | Humid         | 9±2               | 9±2        | 9±2        | 8±2              | 8±2        | 8±2        | 9±2                  | 9±2         | 13±11       | 31±13     | 45±25     | 51±30     |
|             | Arid          | 11±2              | 11±2       | 11±2       | 10±2             | 10±2       | 10±2       | 11±2                 | 11±2        | 11±2        | 22±4      | 29±3      | 31±3      |
| Groundnuts  | Humid         | 705±176           | 752±205    | 793±219    | 732±123          | 816±131    | 849±134    | 723±182              | 802±180     | 868±156     | 898±140   | 1048±156  | 1111±151  |
|             | Arid          | 1025±80           | 1054±83    | 1061±84    | 957±71           | 1001±80    | 1061±136   | 1070±96              | 1090±95     | 1097±97     | 2084±623  | 2400±669  | 2514±679  |
| Rapeseed    | Humid         | 1079±211          | 1079±211   | 1079±211   | 989±241          | 989±241    | 989±241    | 1111±196             | 1111±196    | 1111±196    | 77±20     | 101±35    | 122±50    |
|             | Arid          | –                 | –          | –          | –                | –          | –          | –                    | –           | –           | 89±21     | 128±35    | 168±43    |
| Sunflower   | Humid         | 1438±289          | 1698±342   | 1820±348   | 1134±358         | 1388±501   | 1532±595   | 1280±454             | 1676±355    | 1746±376    | 732±219   | 818±291   | 888±322   |
|             | Arid          | 943±202           | 991±224    | 1017±229   | 968±188          | 999±190    | 1026±171   | 993±242              | 1044±268    | 1062±273    | 940±167   | 1059±180  | 1122±163  |
| Tomatoes    | Humid         | 56±12             | 60±13      | 62±13      | 52±13            | 57±12      | 58±13      | 48±12                | 53±13       | 56±14       | –         | –         | –         |
|             | Arid          | 61±11             | 67±12      | 70±13      | 49±11            | 53±12      | 55±12      | 66±16                | 75±17       | 76±17       | –         | –         | –         |
| Apple       | Humid         | 280±92            | 298±98     | 304±100    | 264±80           | 293±76     | 322±64     | 303±102              | 329±113     | 346±118     | 281±84    | 304±89    | 317±89    |
|             | Arid          | 364±166           | 529±198    | 576±183    | 424±127          | 439±134    | 443±135    | 369±149              | 527±150     | 563±127     | 394±153   | 426±160   | 444±164   |
| Tea         | Humid         | 3485±1387         | 3900±1520  | 4225±1533  | 3298±1432        | 3645±1597  | 3852±1670  | 3467±1326            | 3861±1552   | 4101±1653   | 4012±1023 | 4477±1071 | 4716±1062 |
|             | Arid          | 16588±9371        | 16892±9542 | 17026±9662 | 14006±7945       | 14345±8133 | 14459±8213 | 17694±9990           | 18040±10210 | 18165±10314 |           |           |           |
| Tobacco     | Humid         | 1256±301          | 1455±363   | 1587±319   | 1202±201         | 1321±202   | 1424±275   | 1178±275             | 1316±298    | 1355±313    | 1836±134  | 1995±94   | 2044±98   |
|             | Arid          | 1218±280          | 1259±296   | 1287±307   | 1041±185         | 1101±196   | 1132±209   | 1256±307             | 1294±337    | 1326±360    | 1537±422  | 2037±531  | 2267±600  |
| Cabbage     | Humid         | 747±68            | 804±56     | 826±53     | 664±111          | 716±94     | 746±83     | 738±93               | 782±92      | 803±91      | 676±68    | 718±61    | 737±58    |
|             | Arid          | 657±155           | 714±142    | 731±143    | 560±138          | 576±144    | 582±145    | 738±151              | 763±161     | 772±165     | 691±139   | 750±141   | 775±140   |
| Grapes      | Humid         | –                 | –          | –          | –                | –          | –          | –                    | –           | –           | 229±42    | 251±46    | 260±47    |
|             | Arid          | 280±58            | 280±58     | 280±58     | 245±58           | 245±58     | 245±58     | 294±60               | 294±60      | 294±60      | 232±46    | 243±50    | 248±52    |

Note: “△” refers to the rate of change from 2000 to 2018. “–” means no crops are grown.

Supplementary Figures

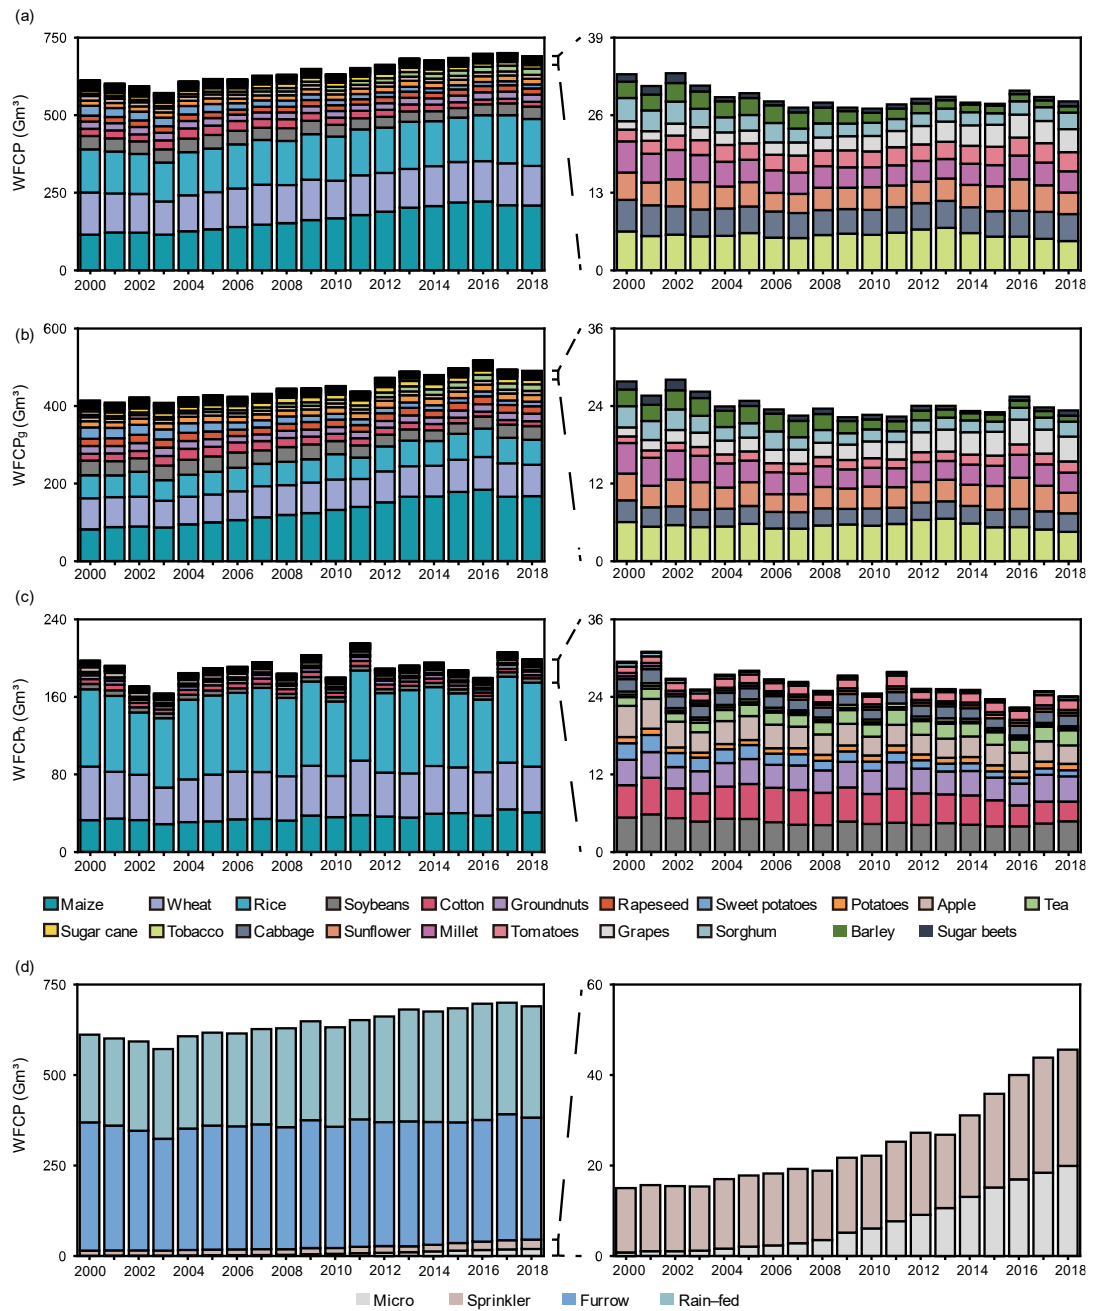

Fig. S1 The WFCP (a), WFCP<sub>g</sub> (b), WFCP<sub>b</sub> (c) of 21 crops, and total WFCP under different water supply and irrigation practices (d).

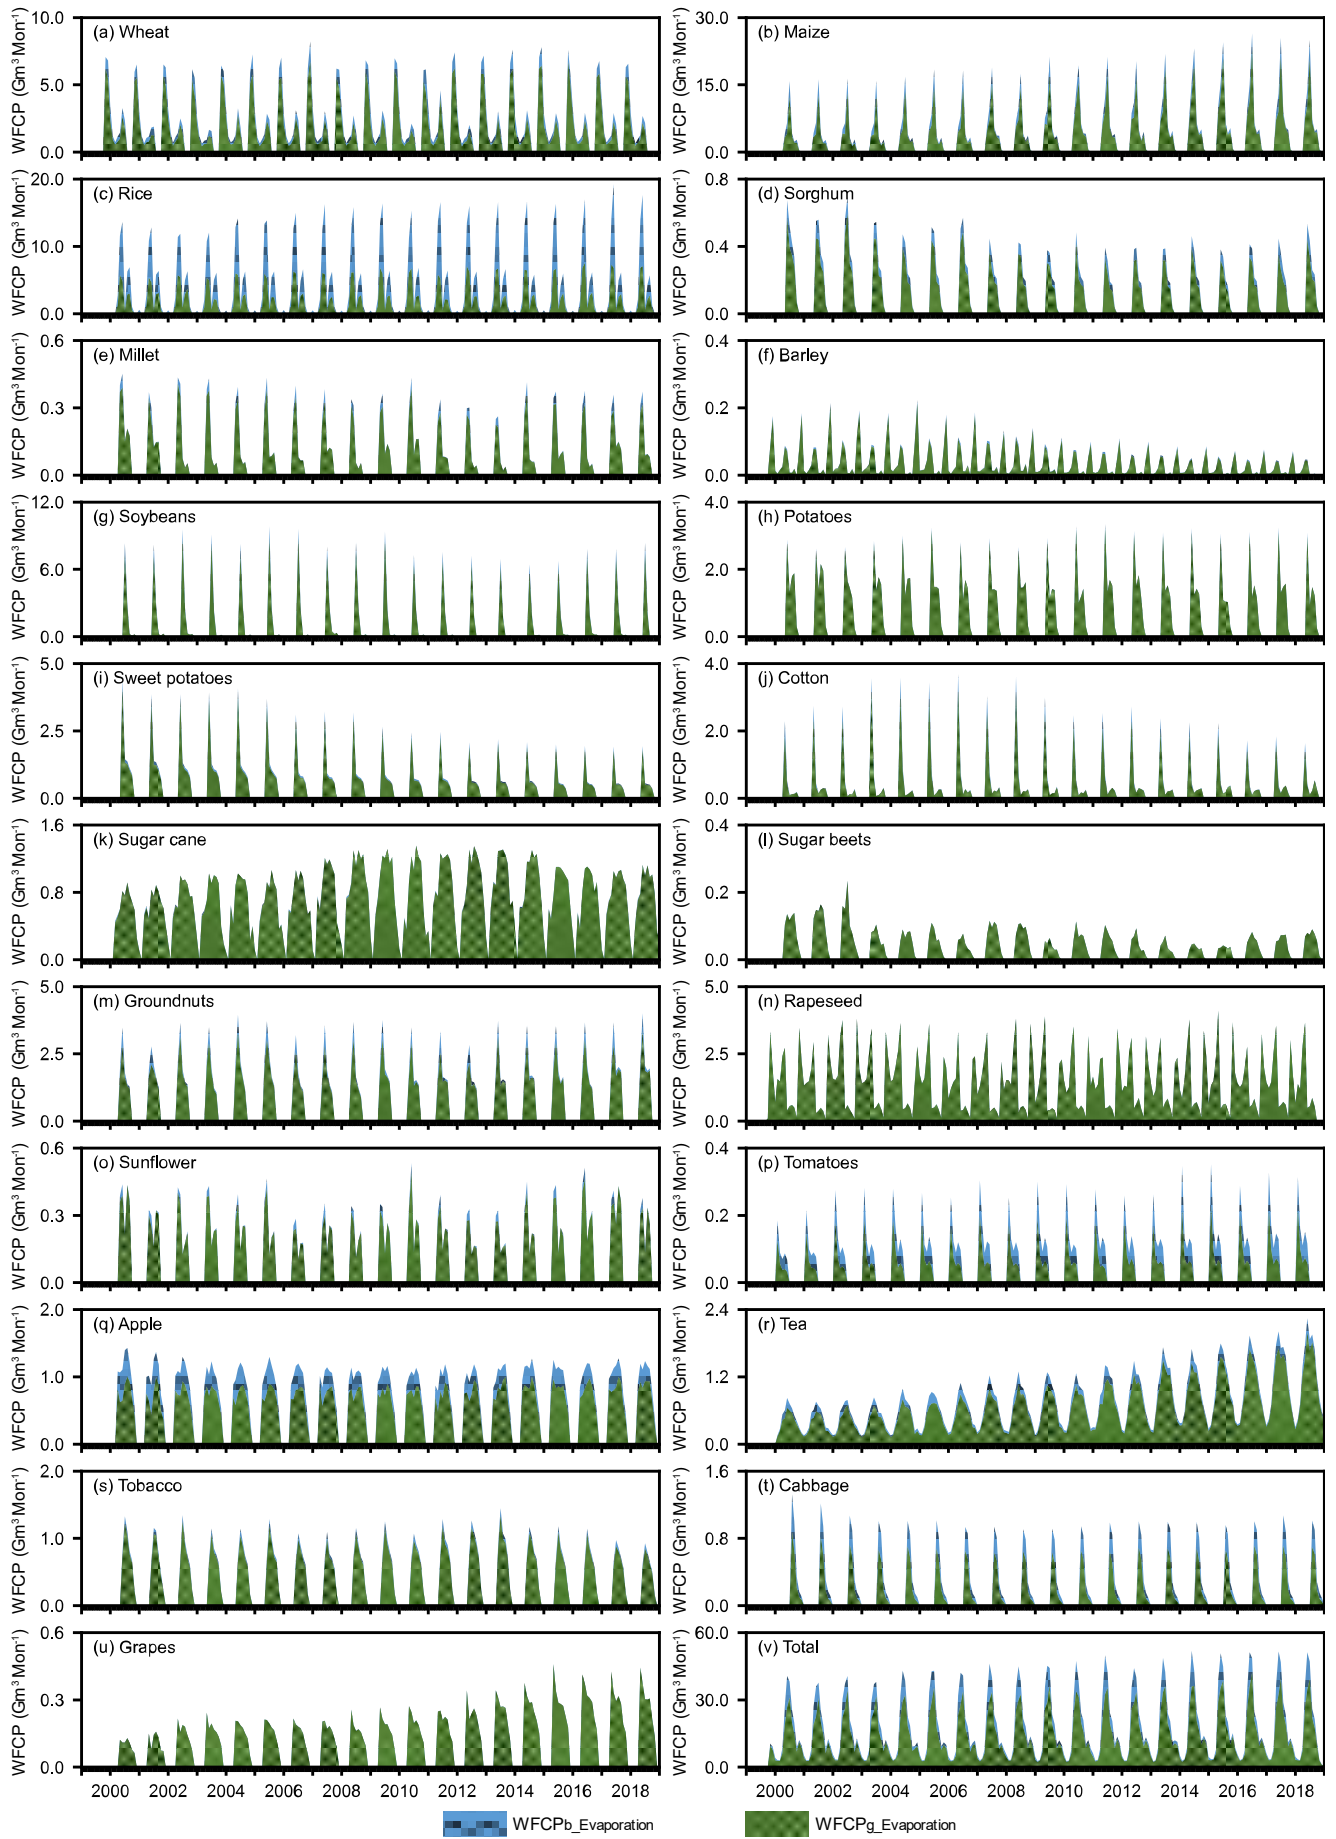

**Fig. S2 Total national monthly WFCPg and WFCPb in soil evaporation (cross filling represents WFCPg, dot filling indicates WFCPb).**

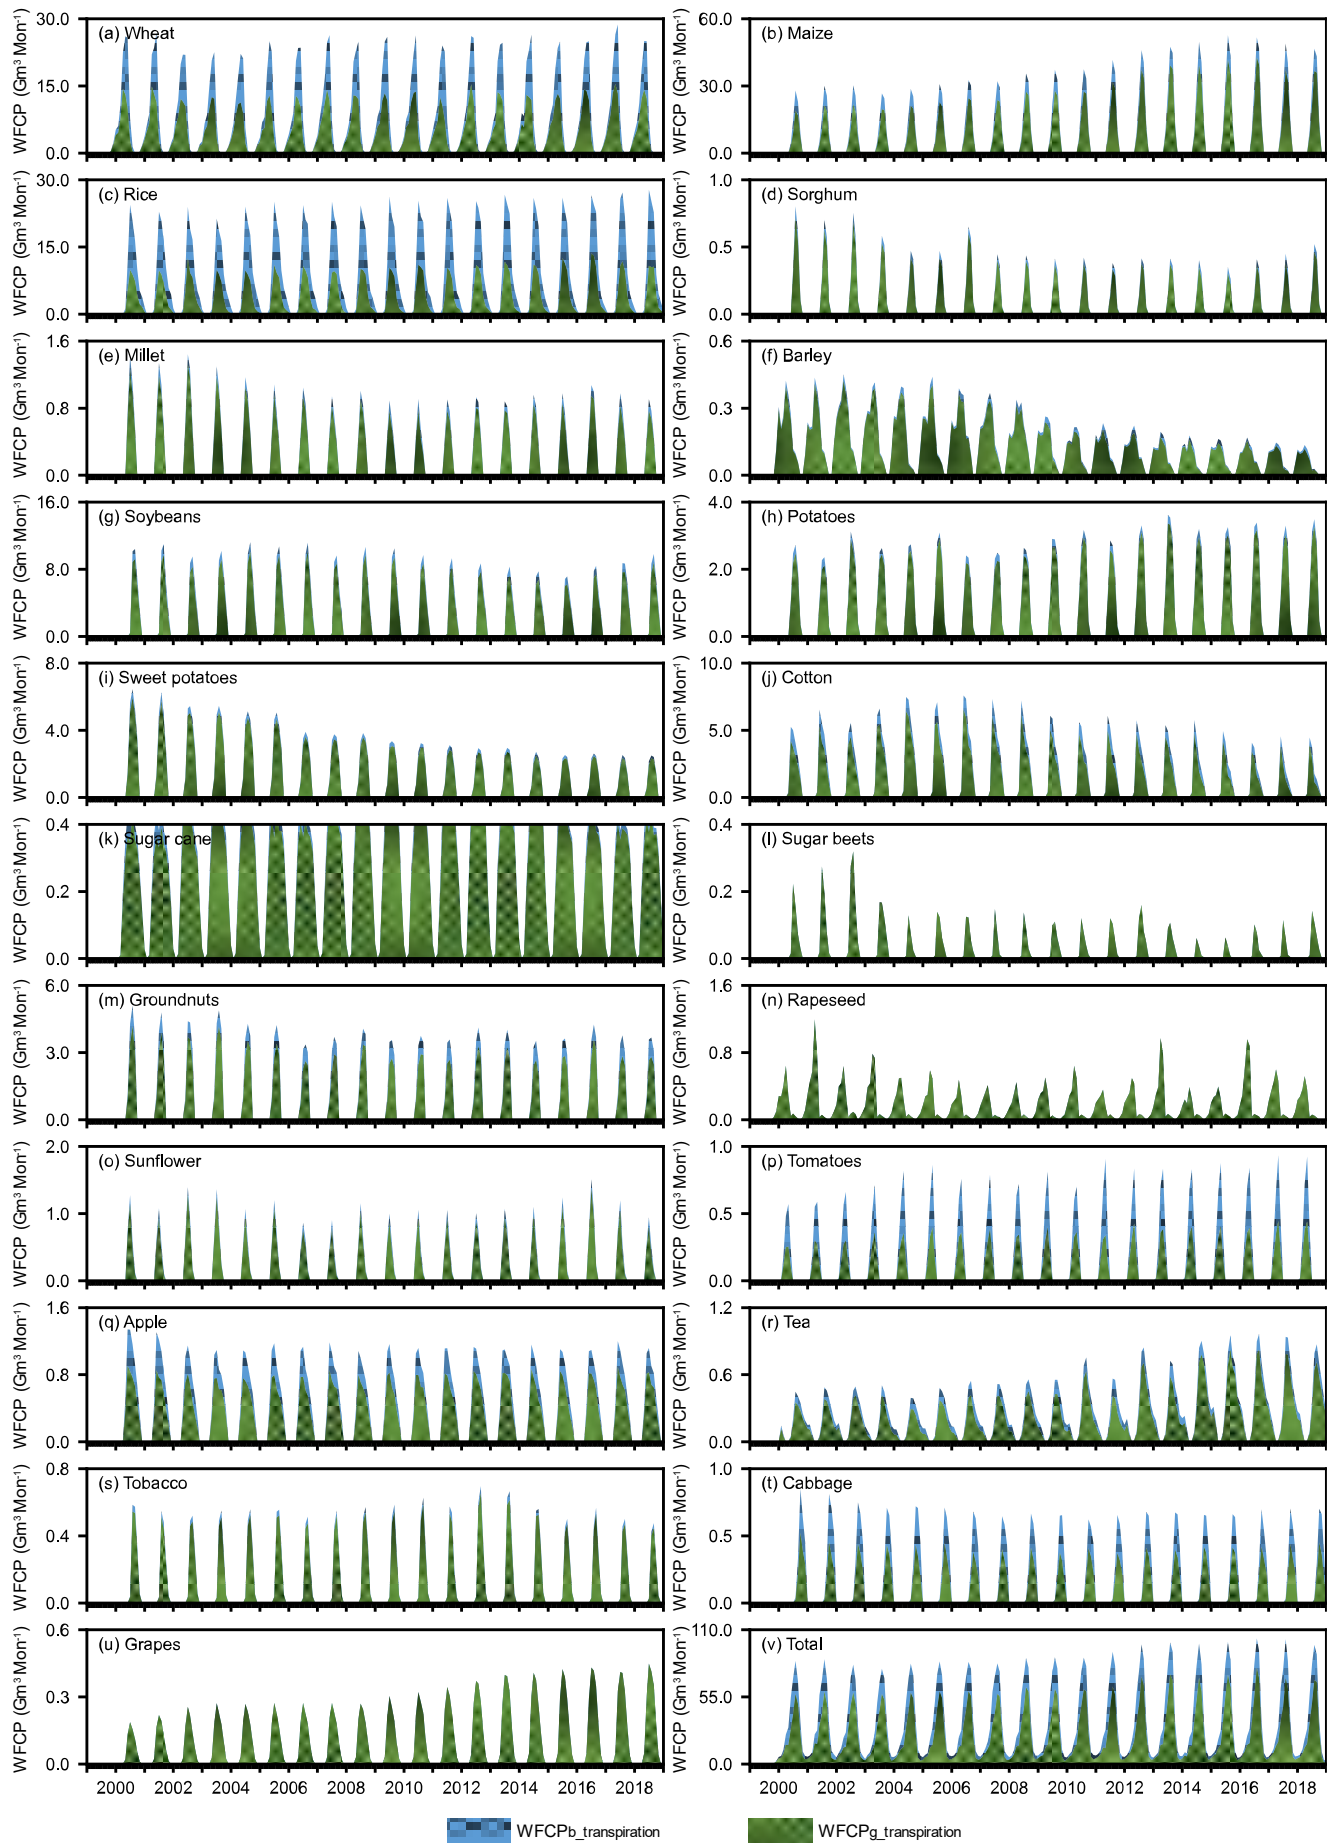

Fig. S3 Total national monthly WFCPg and WFCPb in crop transpiration (cross filling represents WFCPg, dot filling indicates WFCPb).



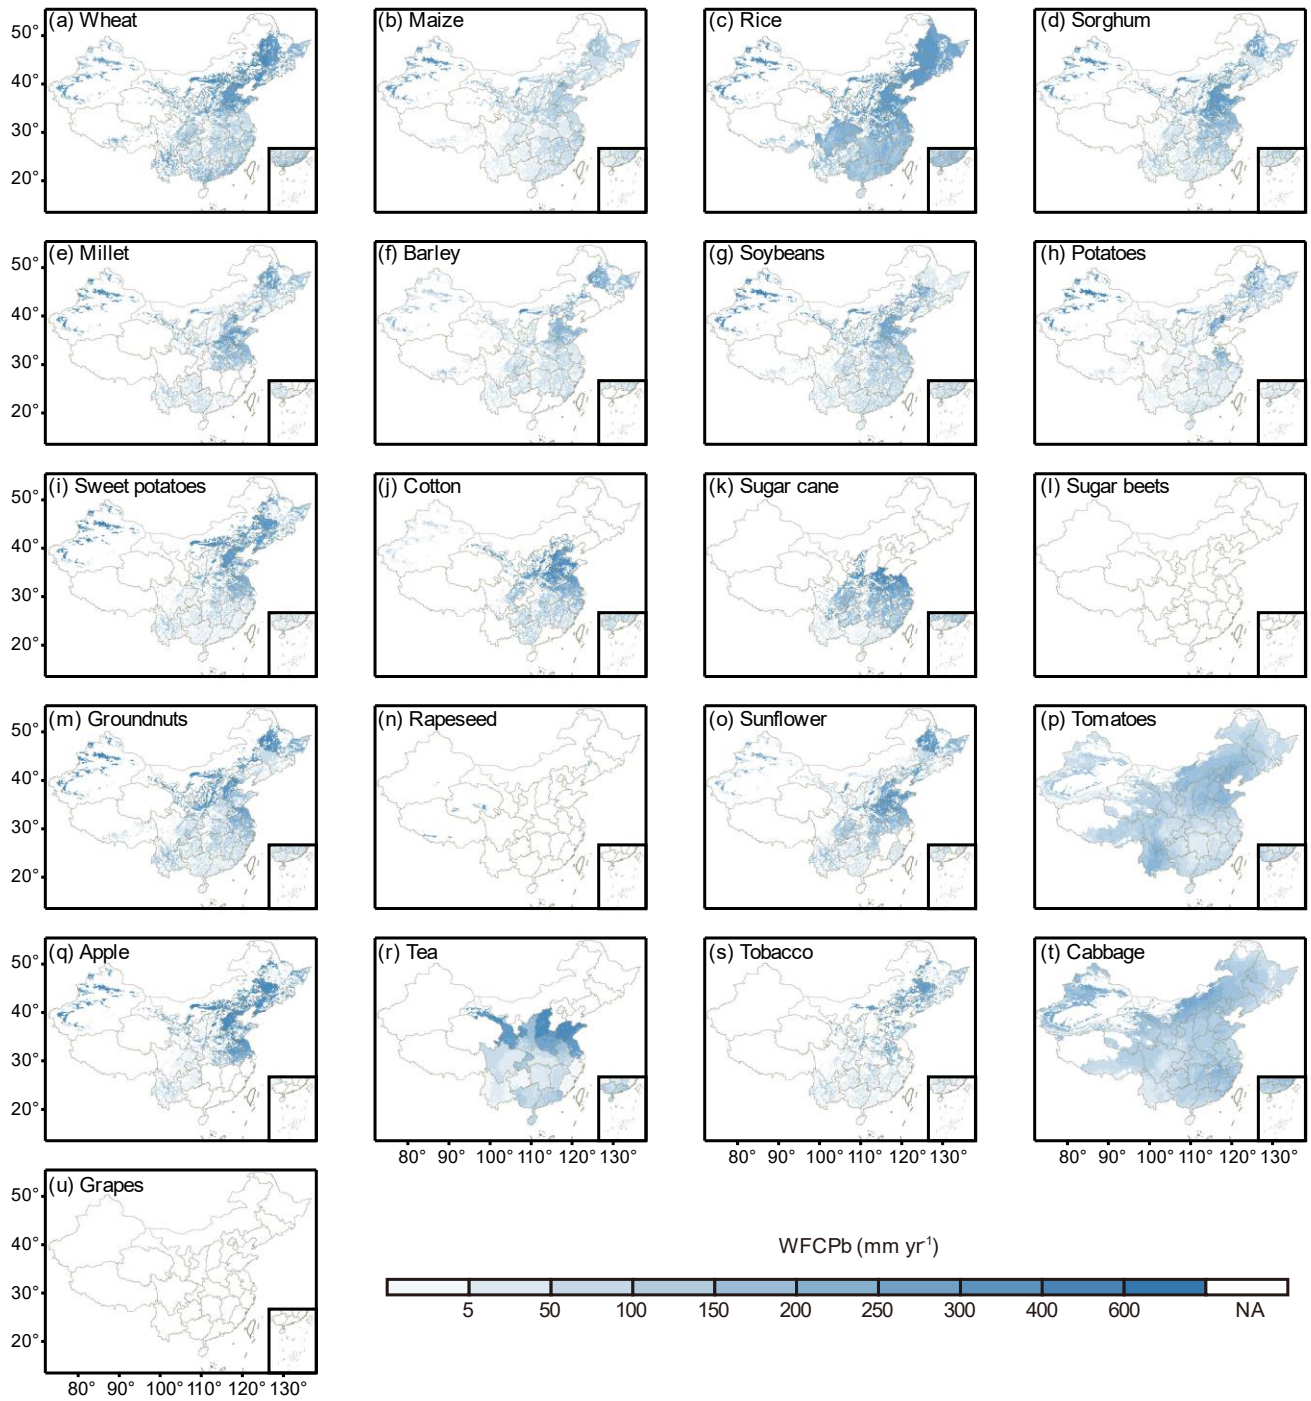

Fig. S4 Gridded WFCPb and WFCPg in 2017.

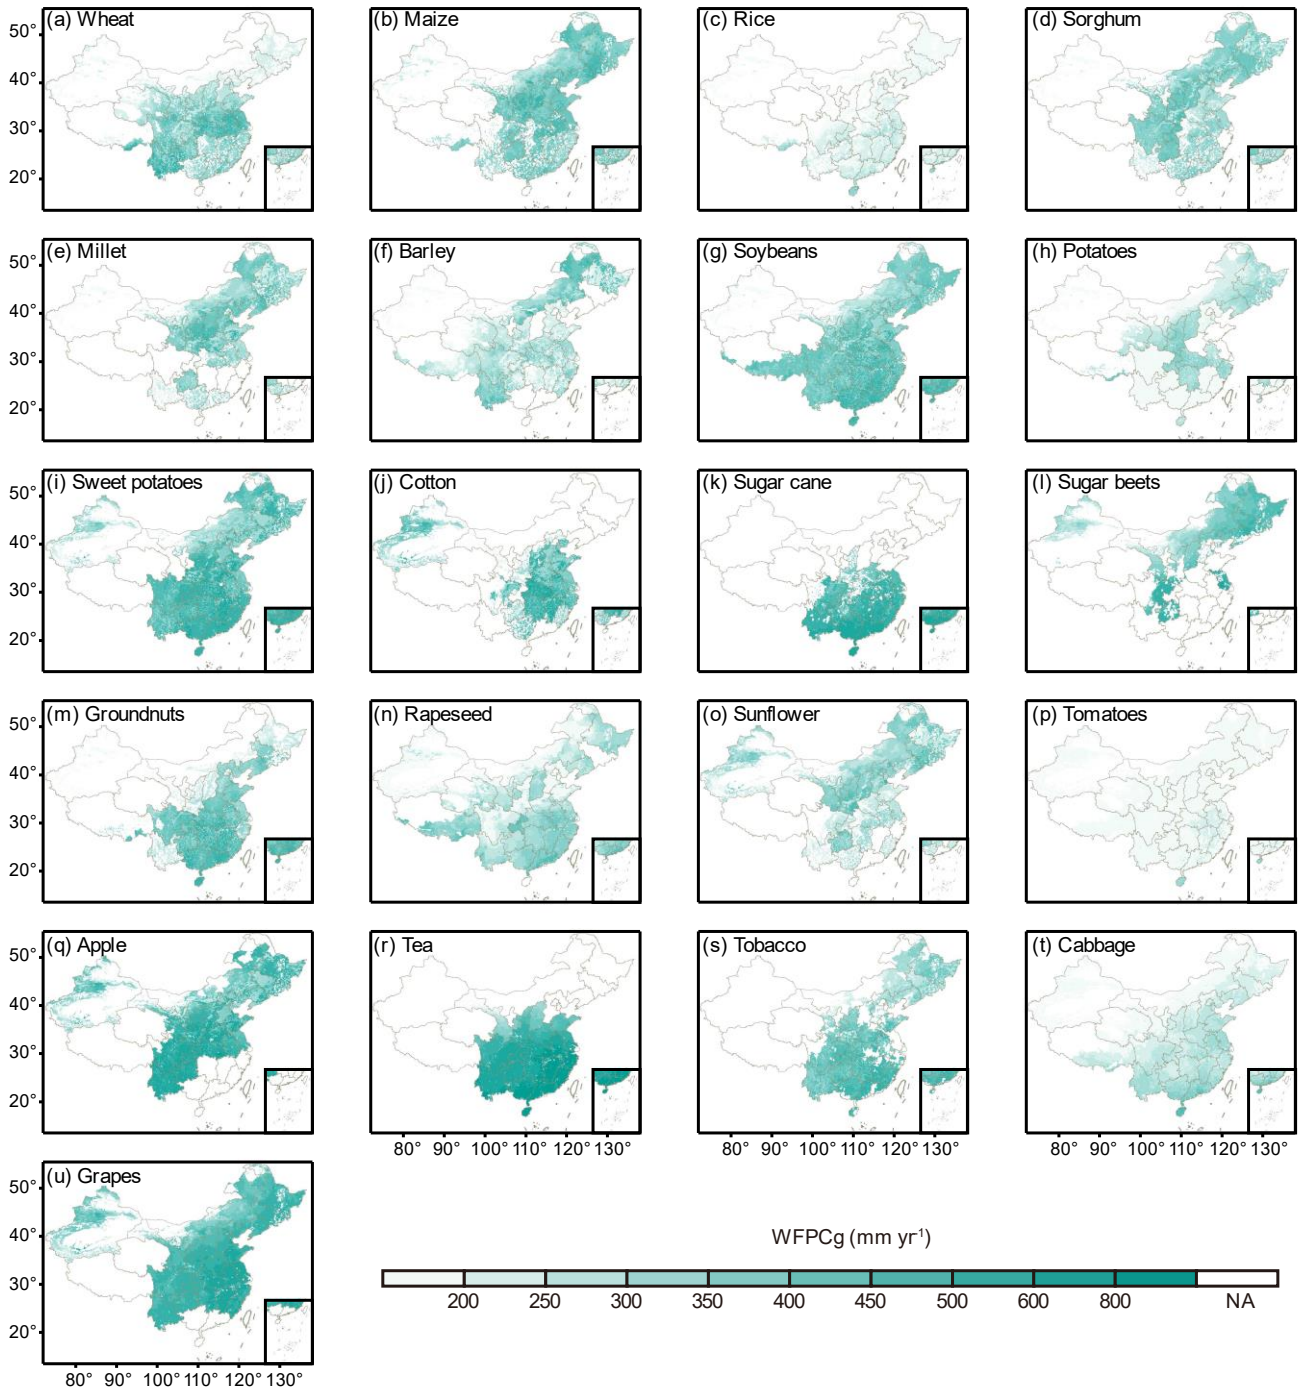

Fig. S5 Gridded WFCPg and WFCPg in 2017.

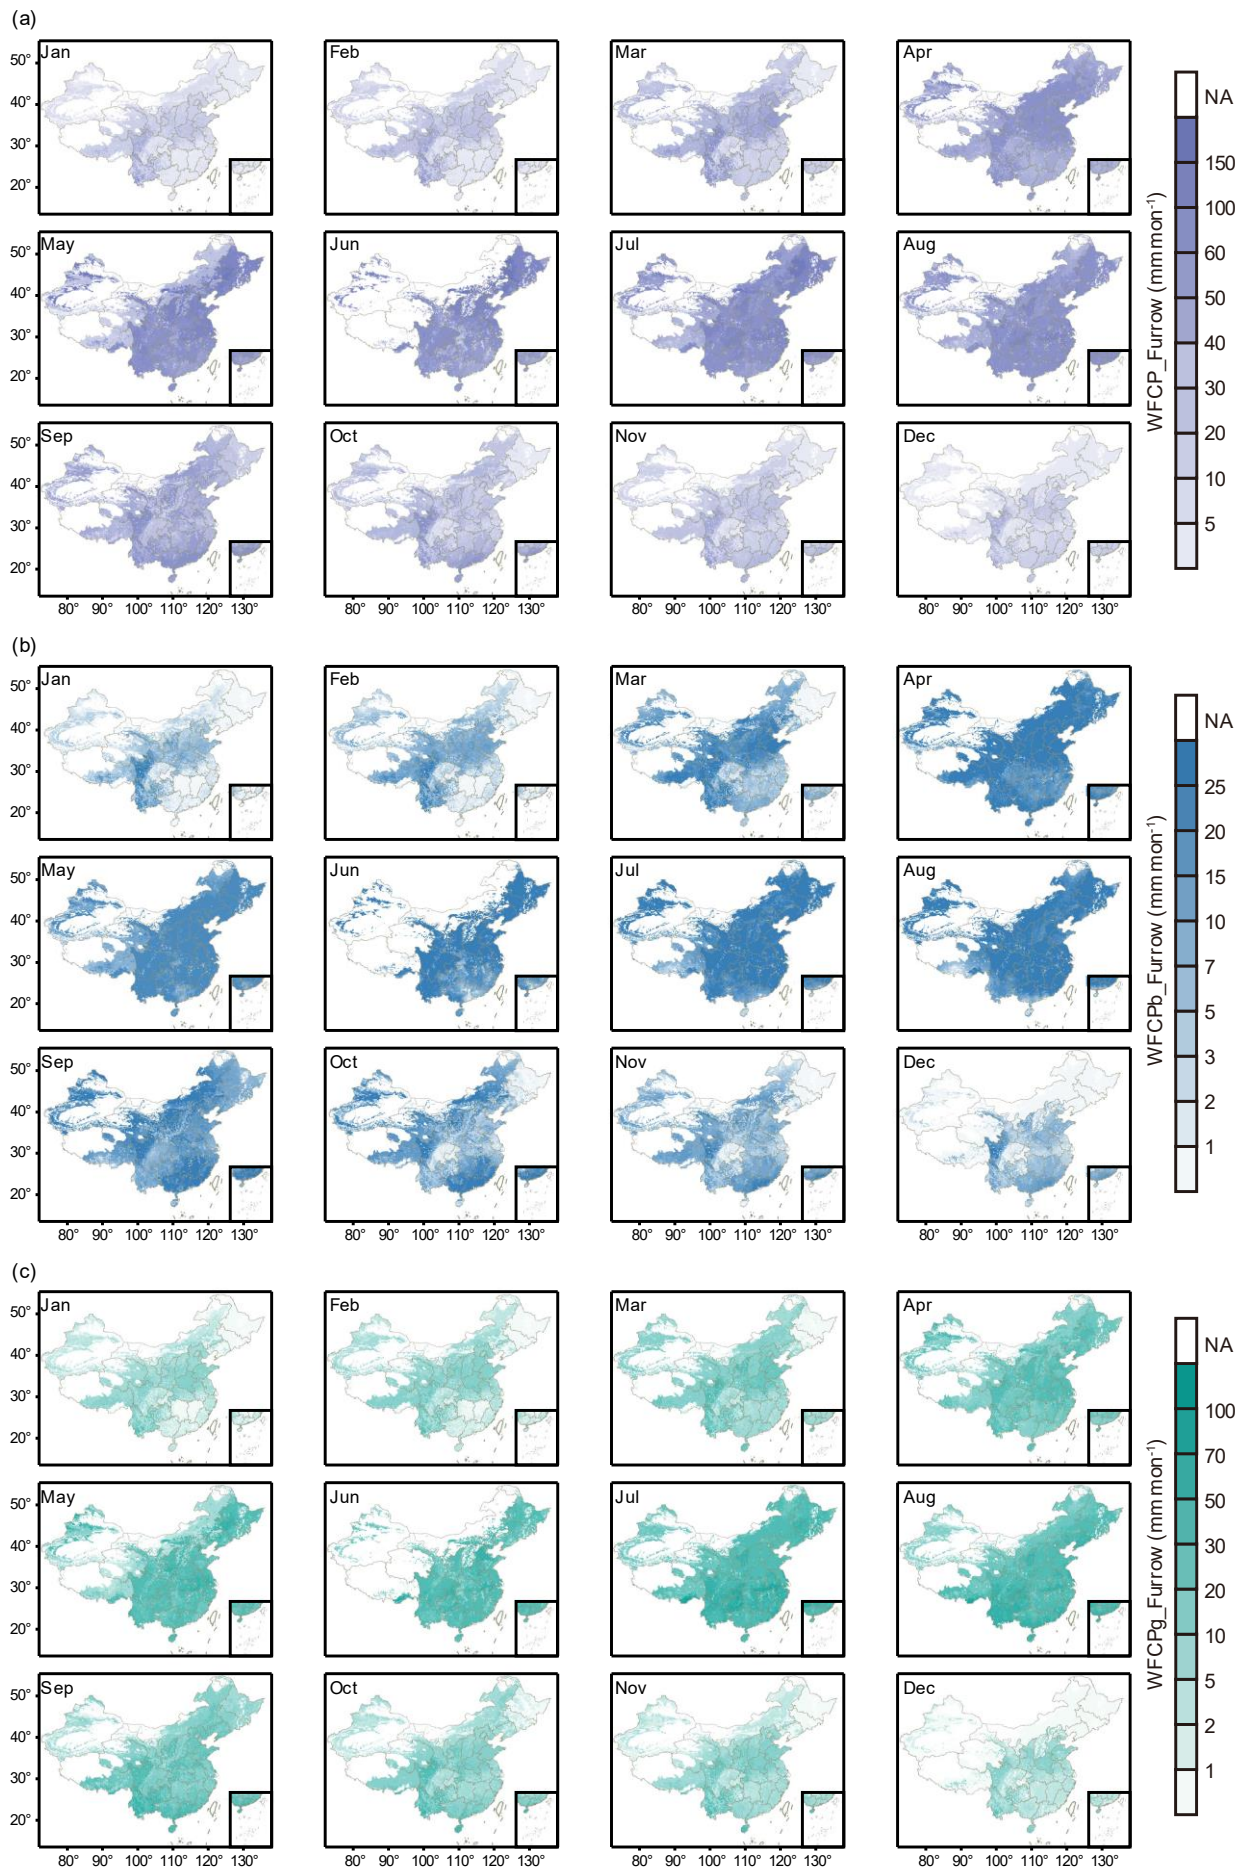

Fig. S6 Gridded monthly total WFCP (a), WFCPb (b) and WFCPg (c) of 21 crops in furrow irrigation in 2017.

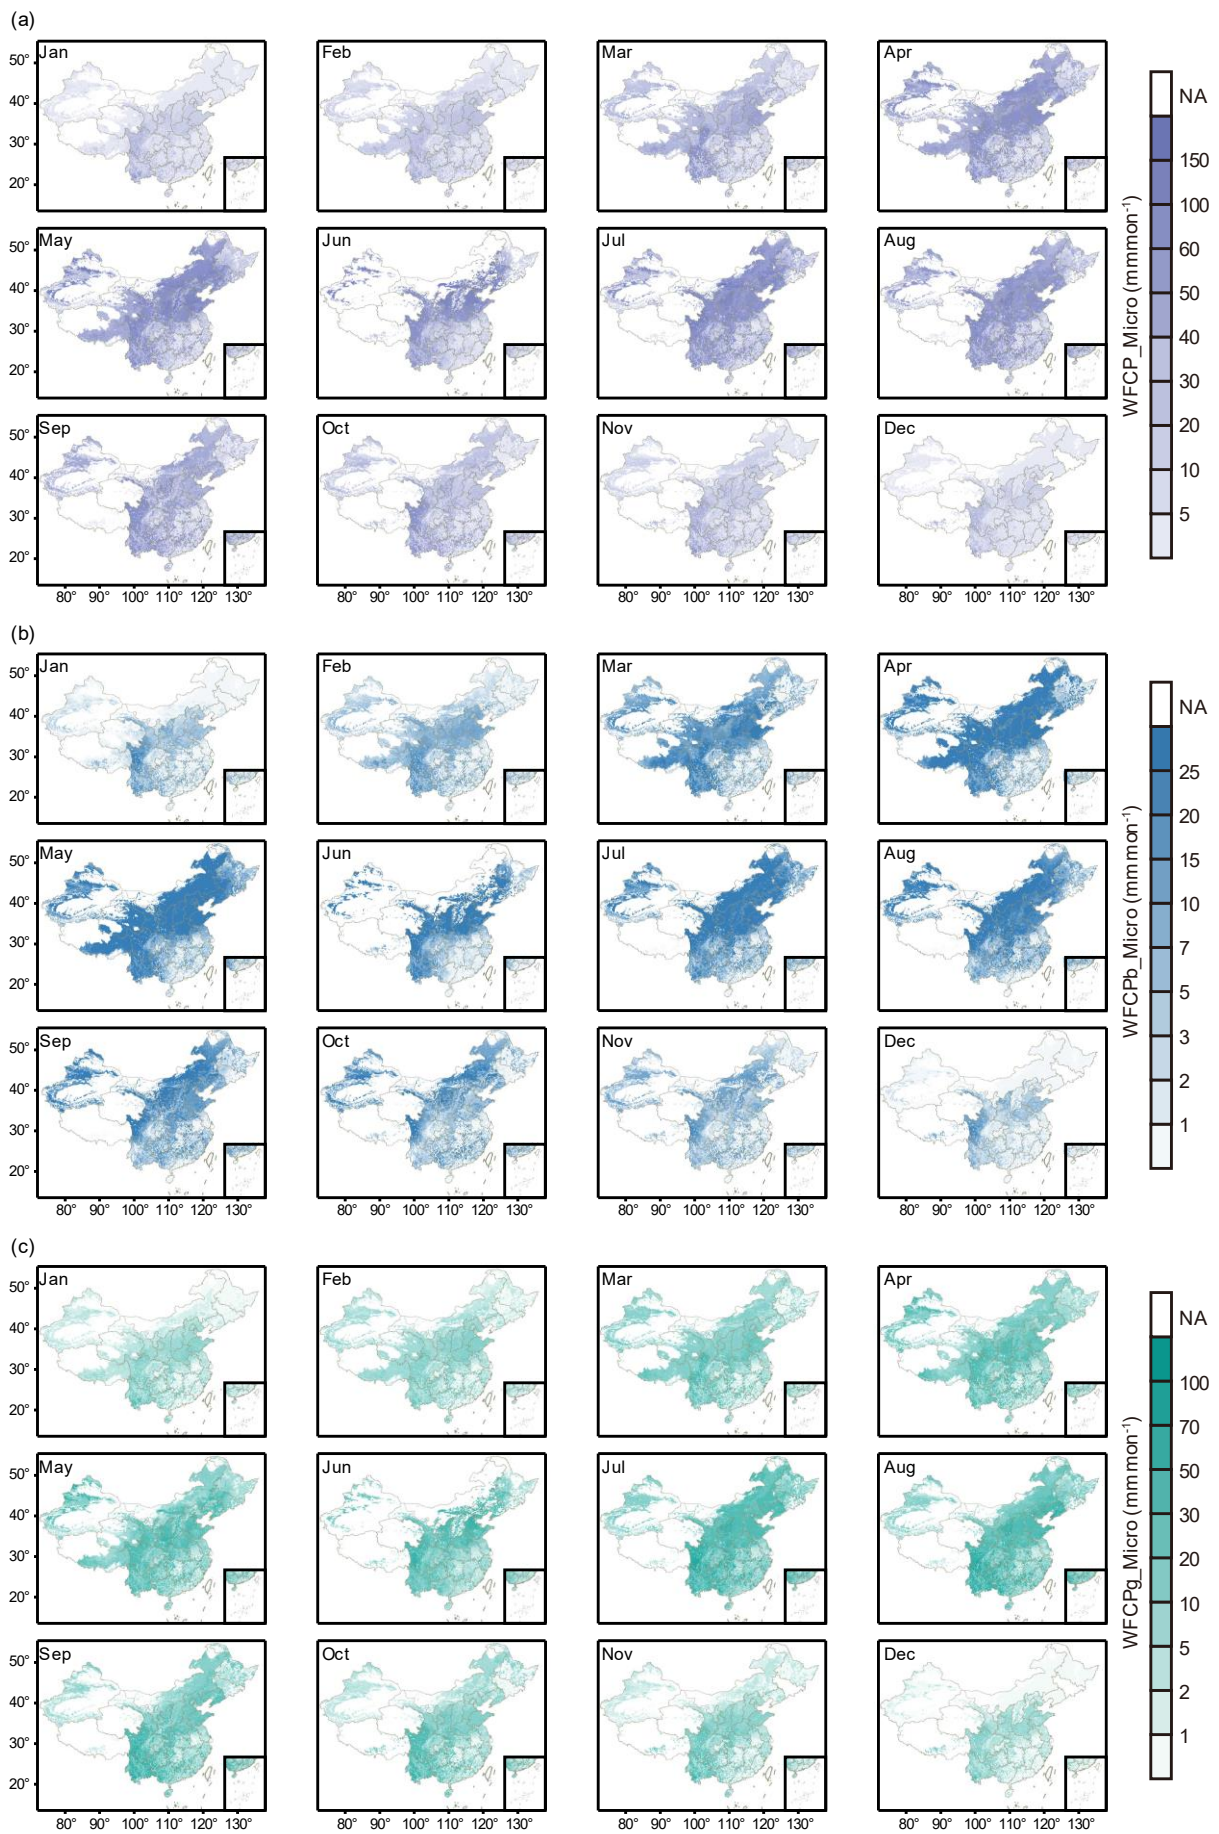

Fig. S7 Gridded monthly total WFCP (a), WFCPb (b) and WFCPg (c) of 21 crops in micro irrigation in 2017.

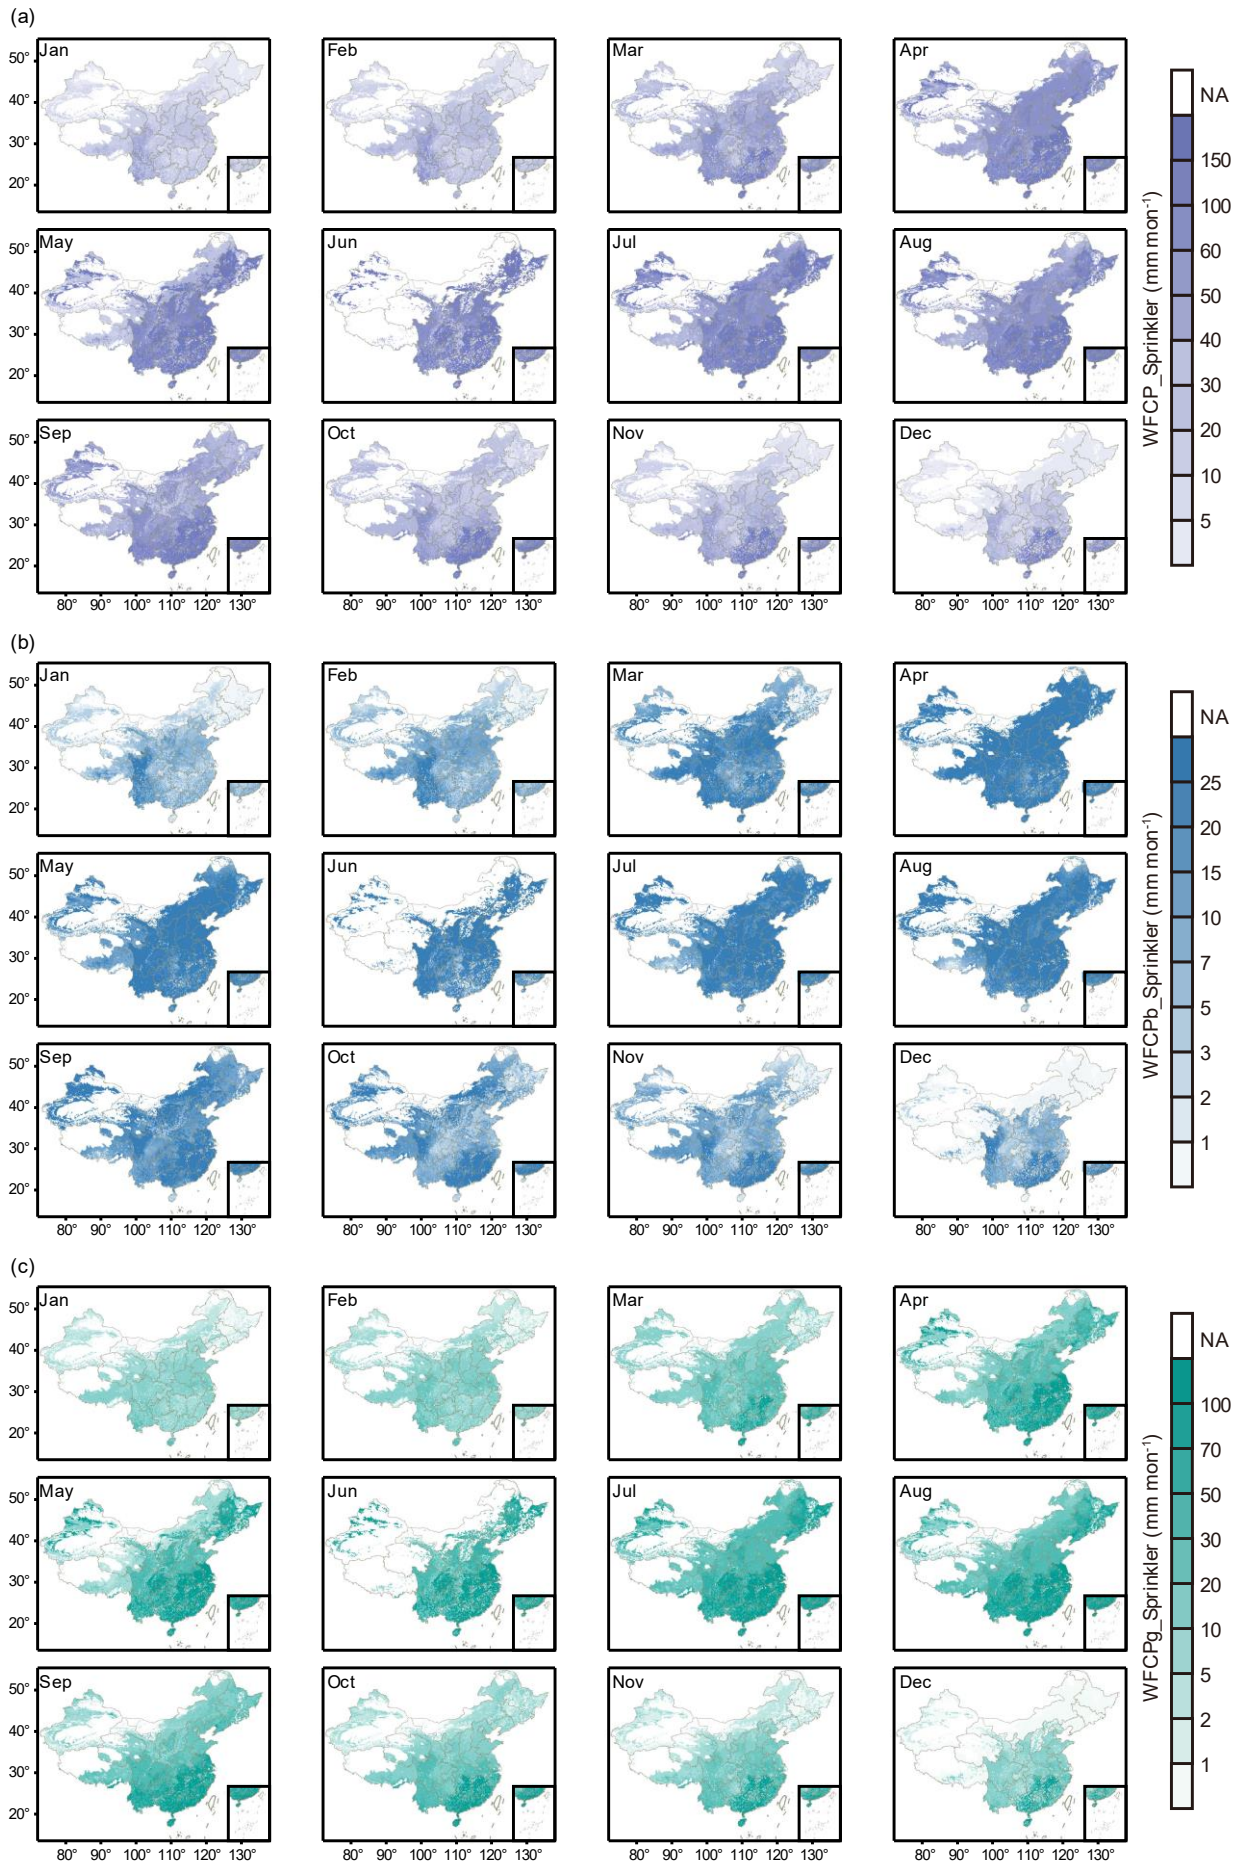

Fig. S8 Gridded monthly total WFCP (a), WFCPb (b) and WFCPg (c) of 21 crops in sprinkler irrigation in 2017.

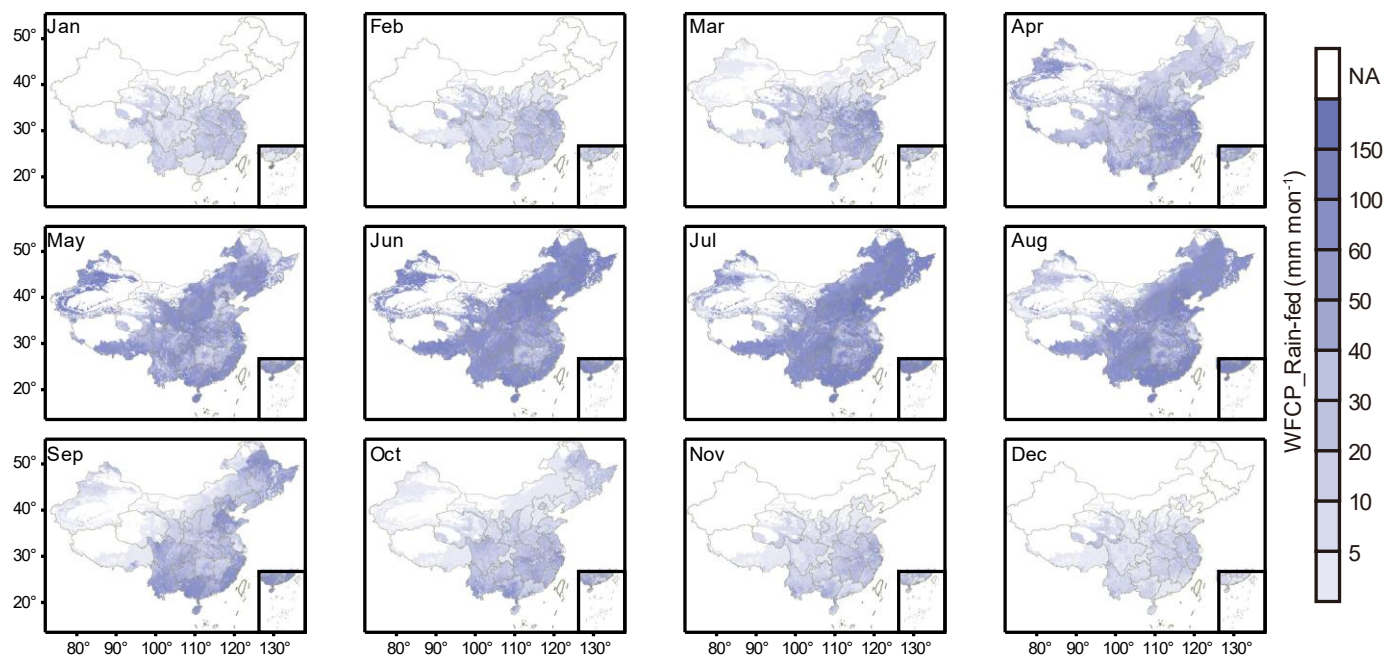

Fig. S9 Gridded monthly total WFCP in rain-fed conditions in 2017.

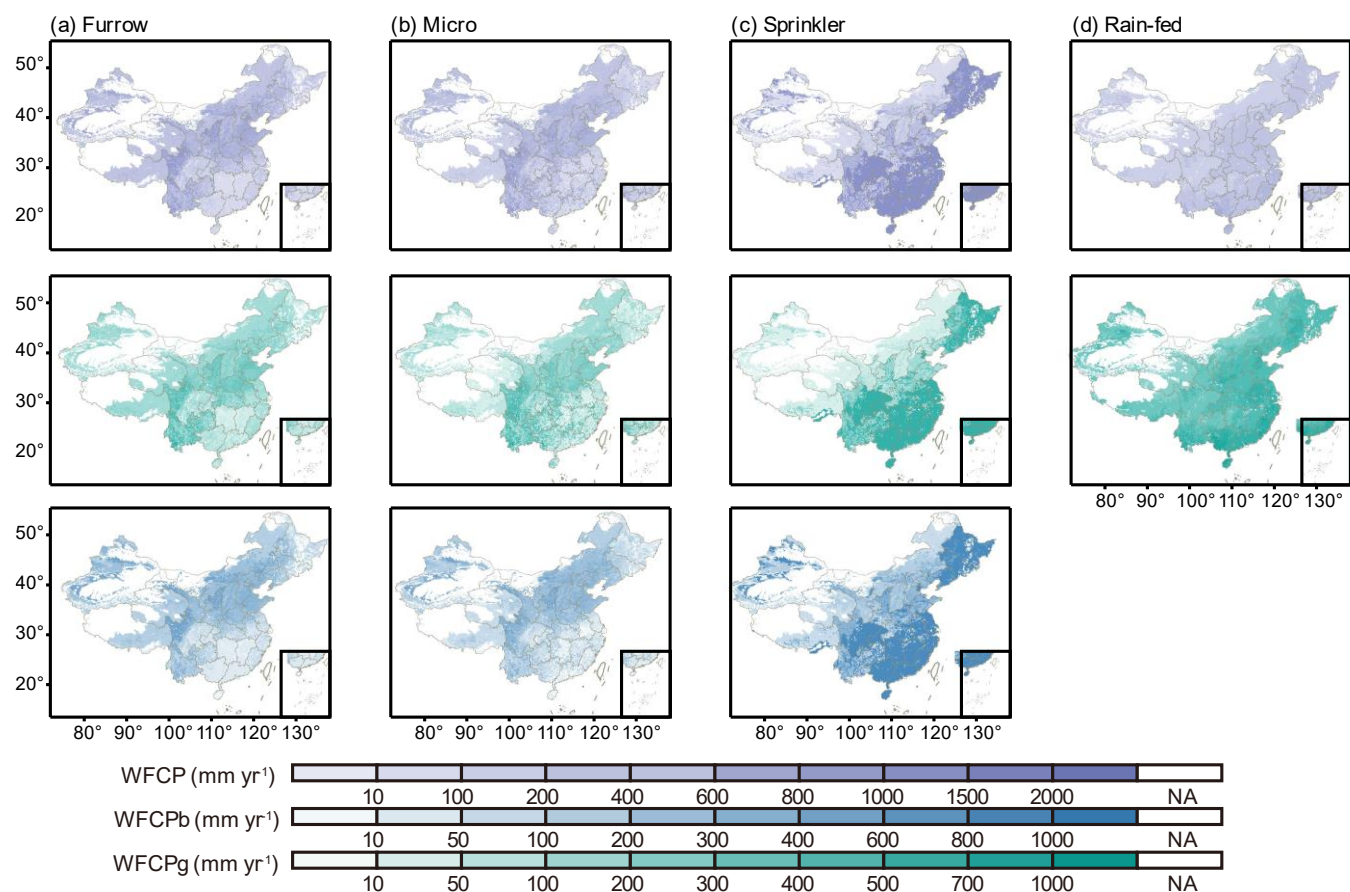

Fig. S10 Gridded monthly total WFCP, WFCPb and WFCPg in furrow irrigation (a), micro irrigation (b), sprinkler irrigation (c) and rain-fed conditions (d) in 2017.

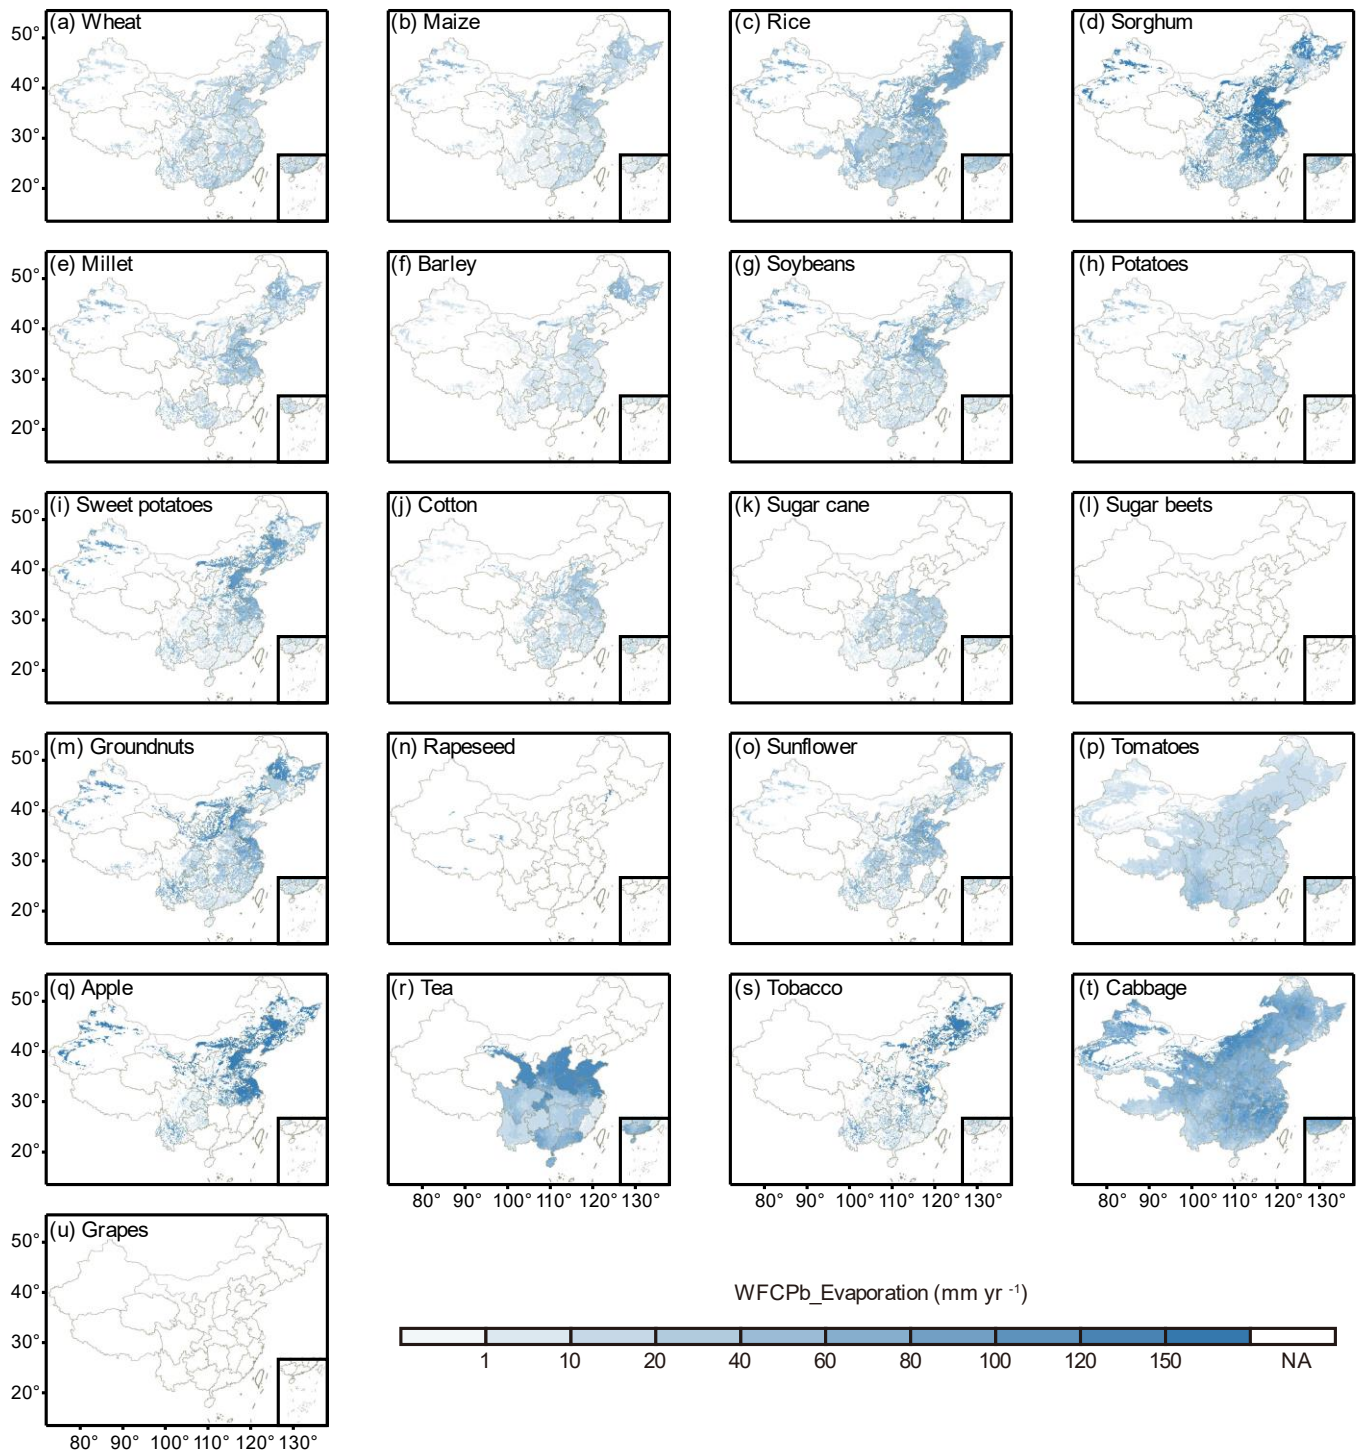

**Fig. S11 Gridded WFCPb in soil evaporation in 2017.**

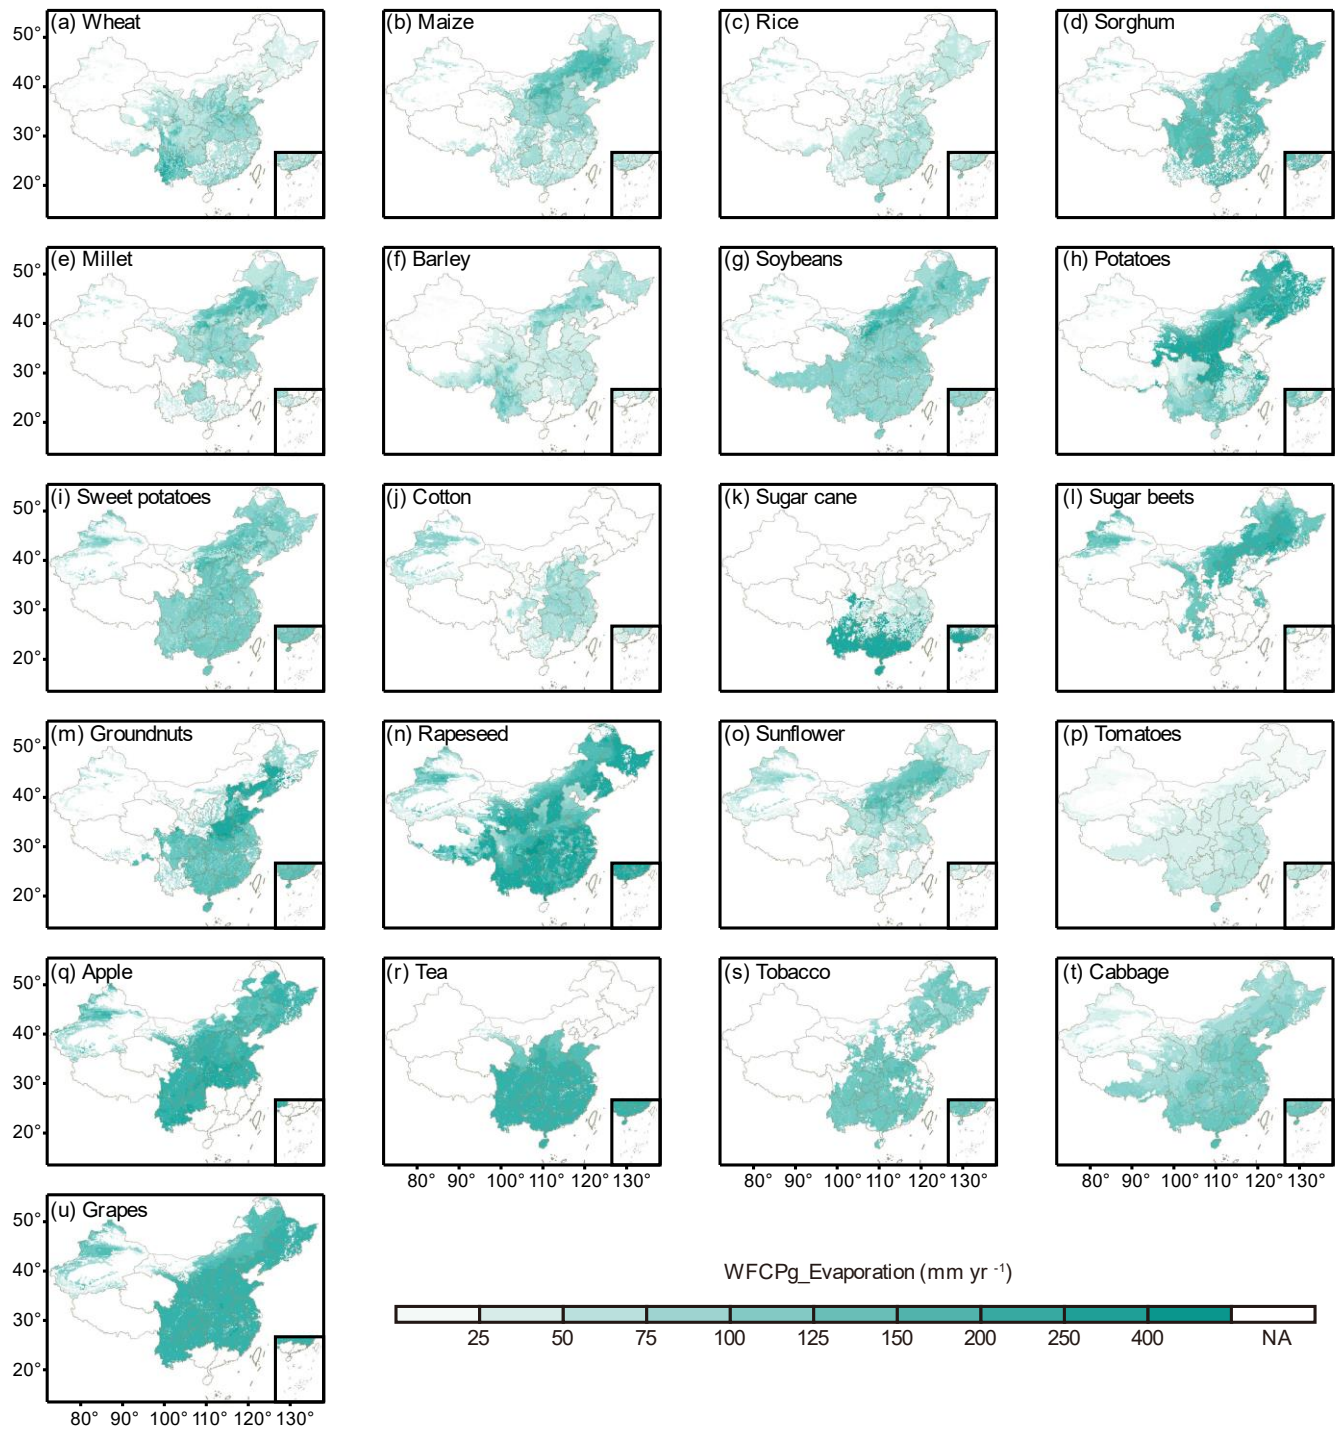

Fig. S12 Gridded WFCPg in soil evaporation in 2017.



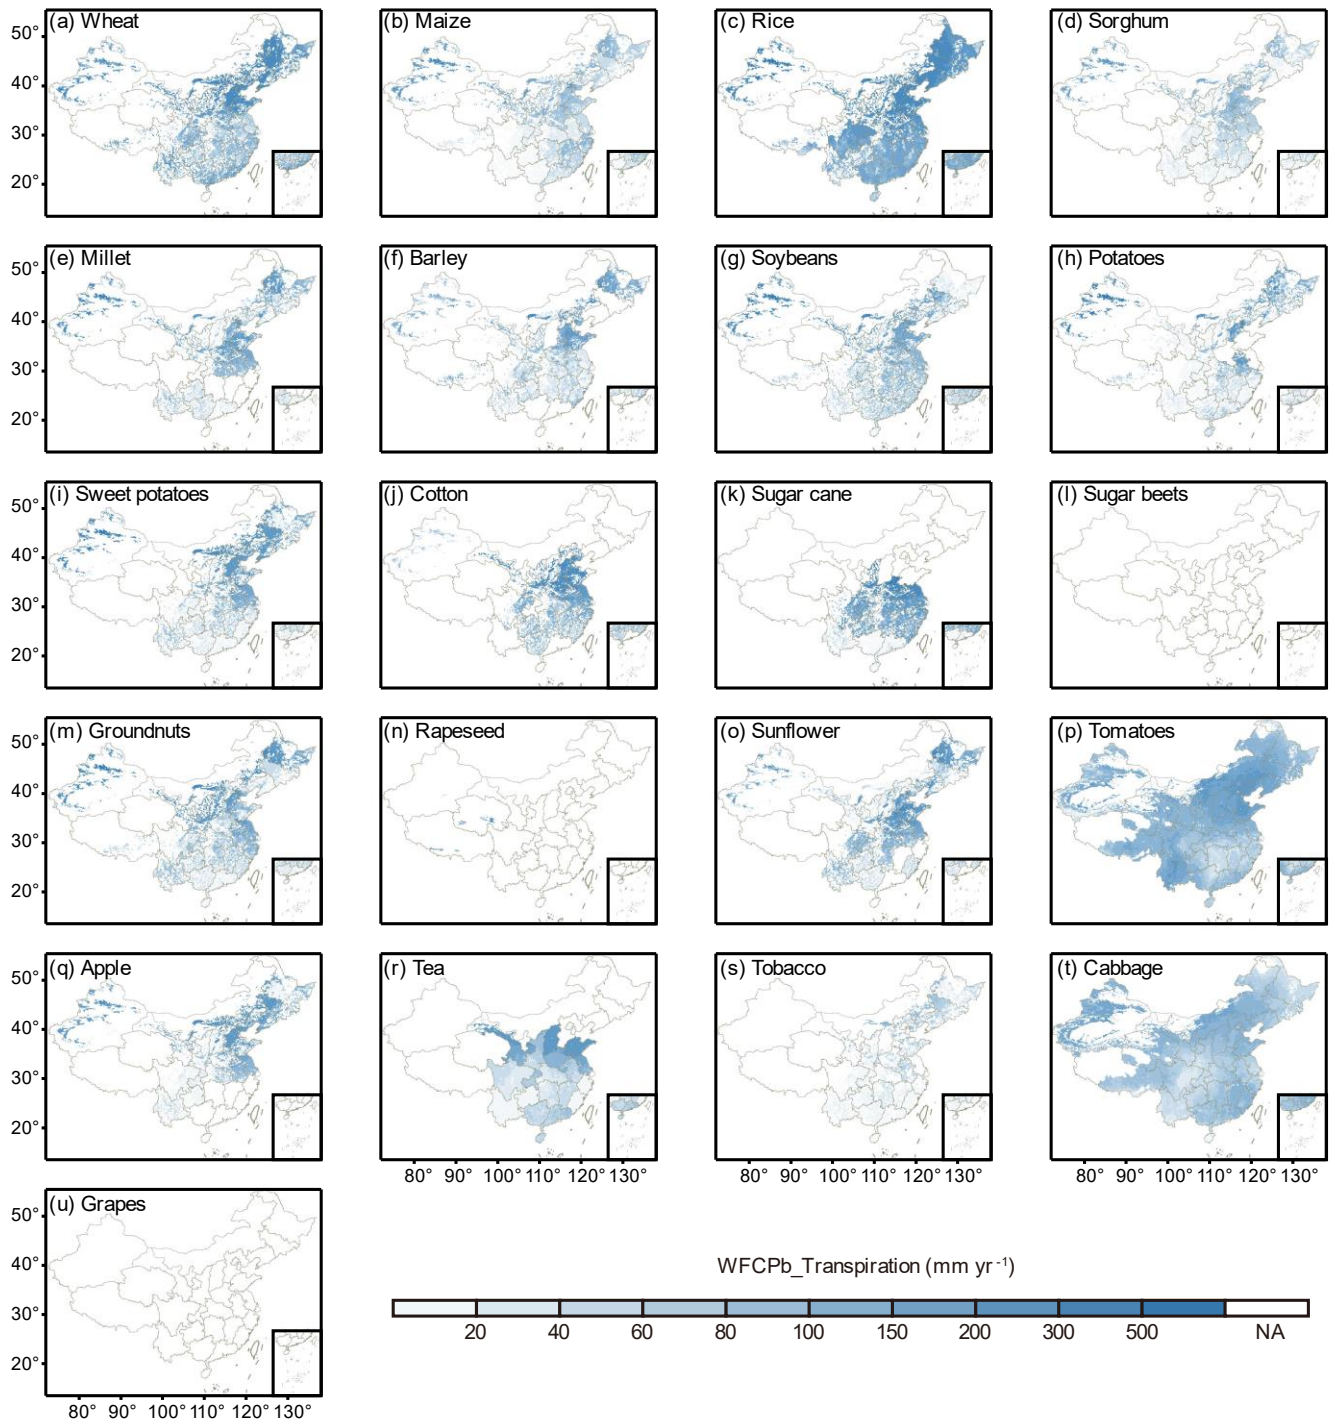

Fig. S13 Gridded WFCPb in soil crop transpiration in 2017.

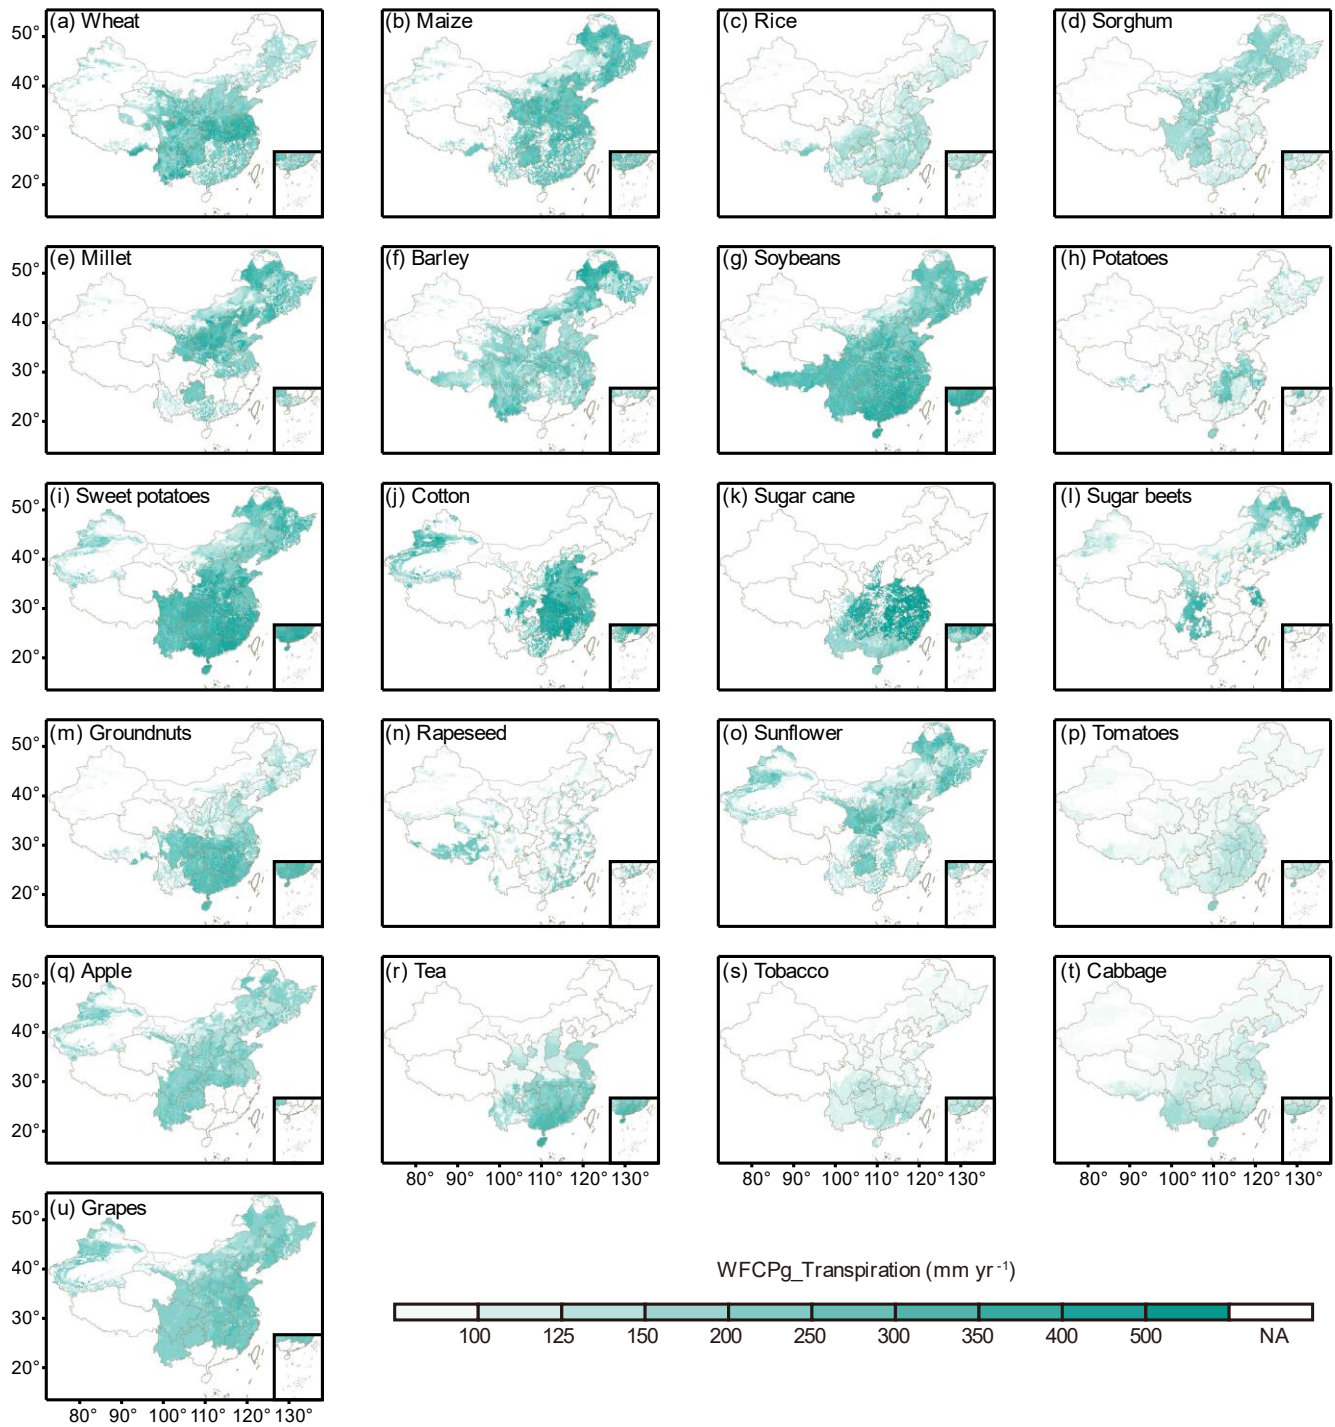

**Fig. S14 Gridded WFCPg in soil crop transpiration in 2017.**

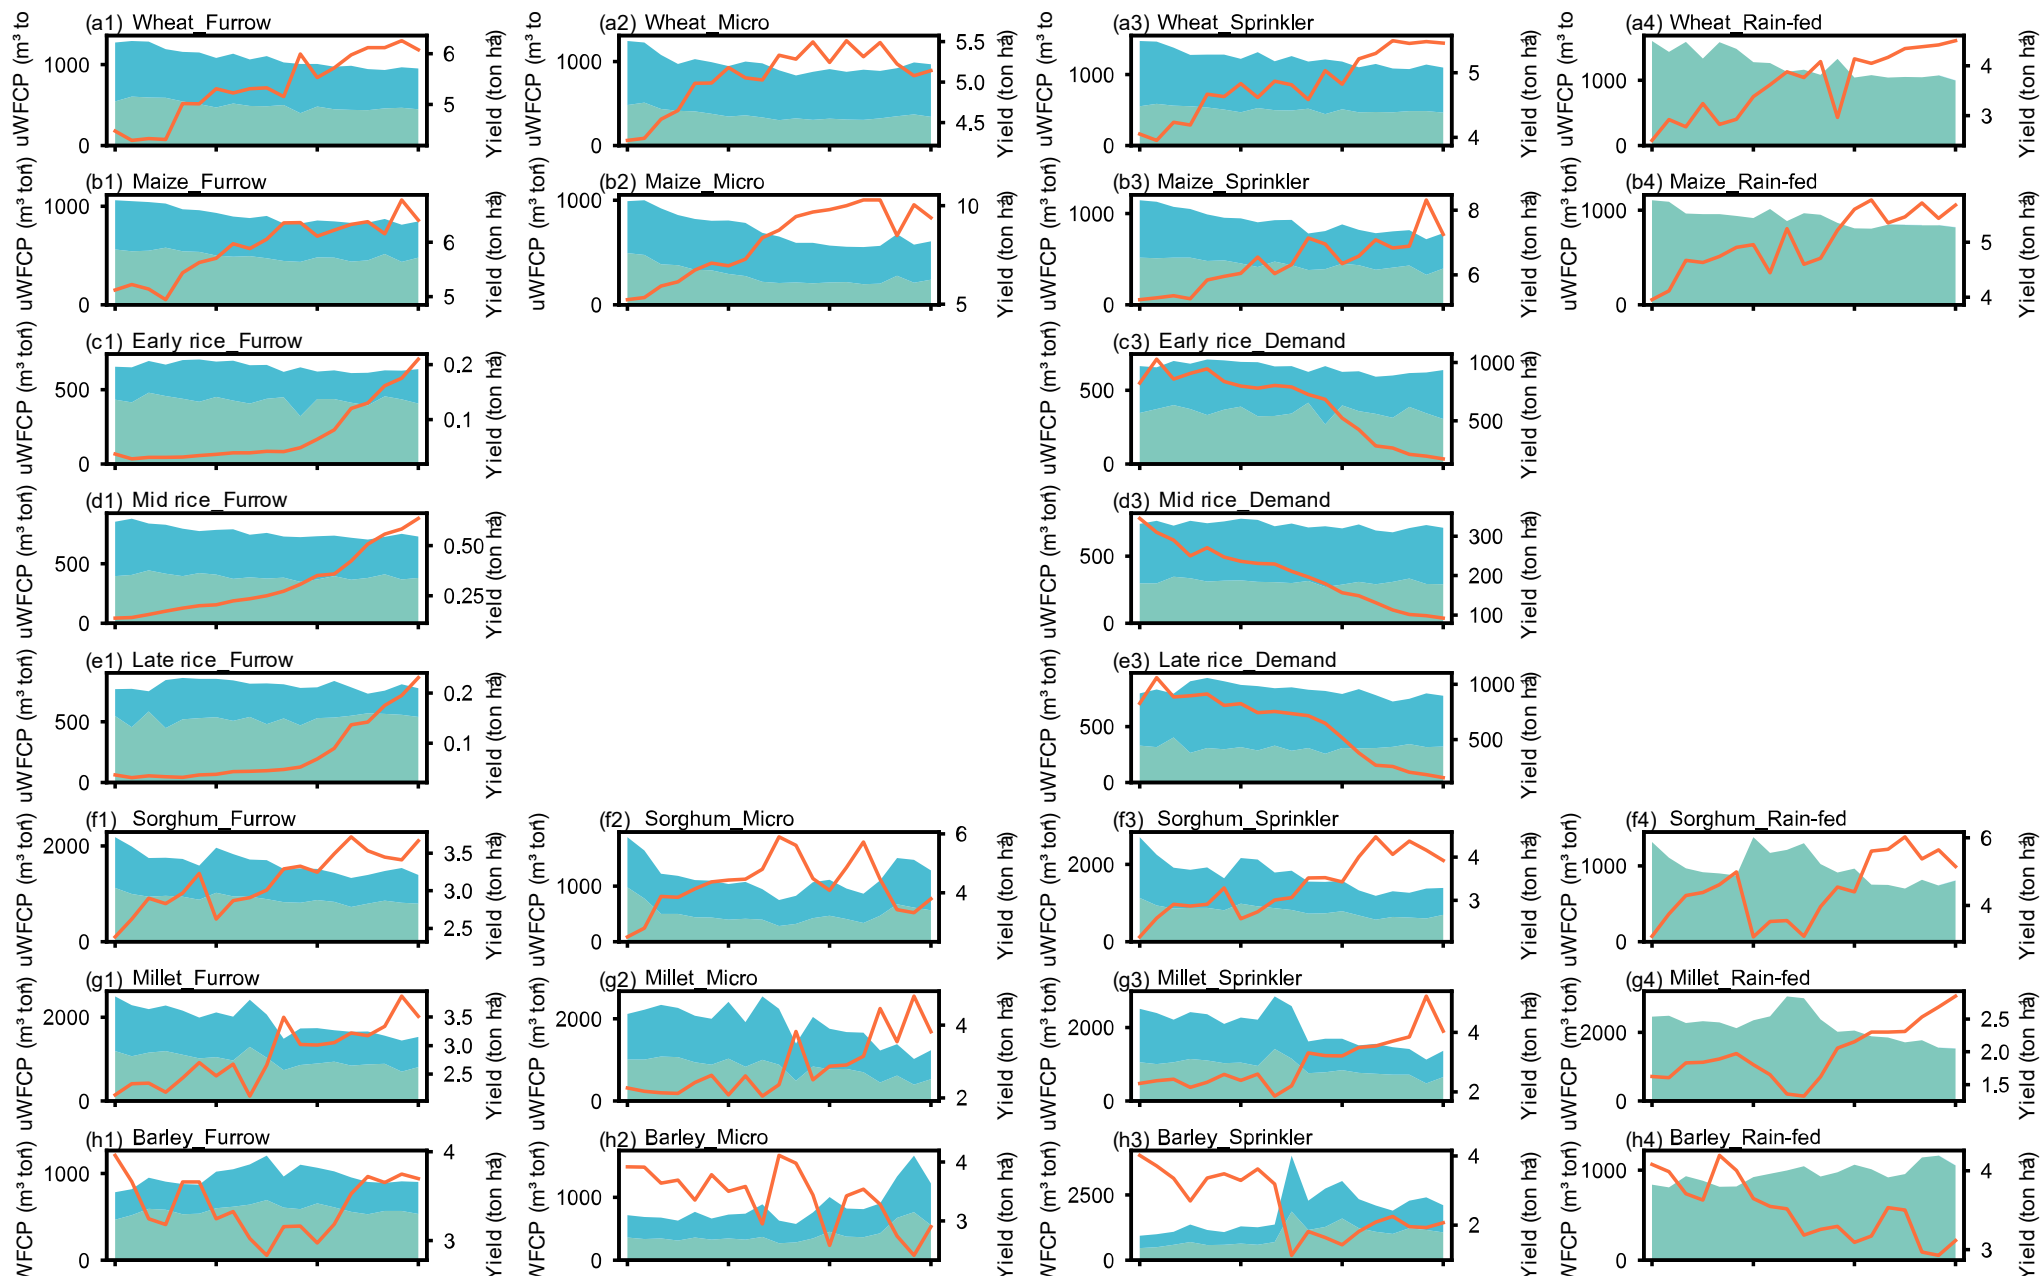

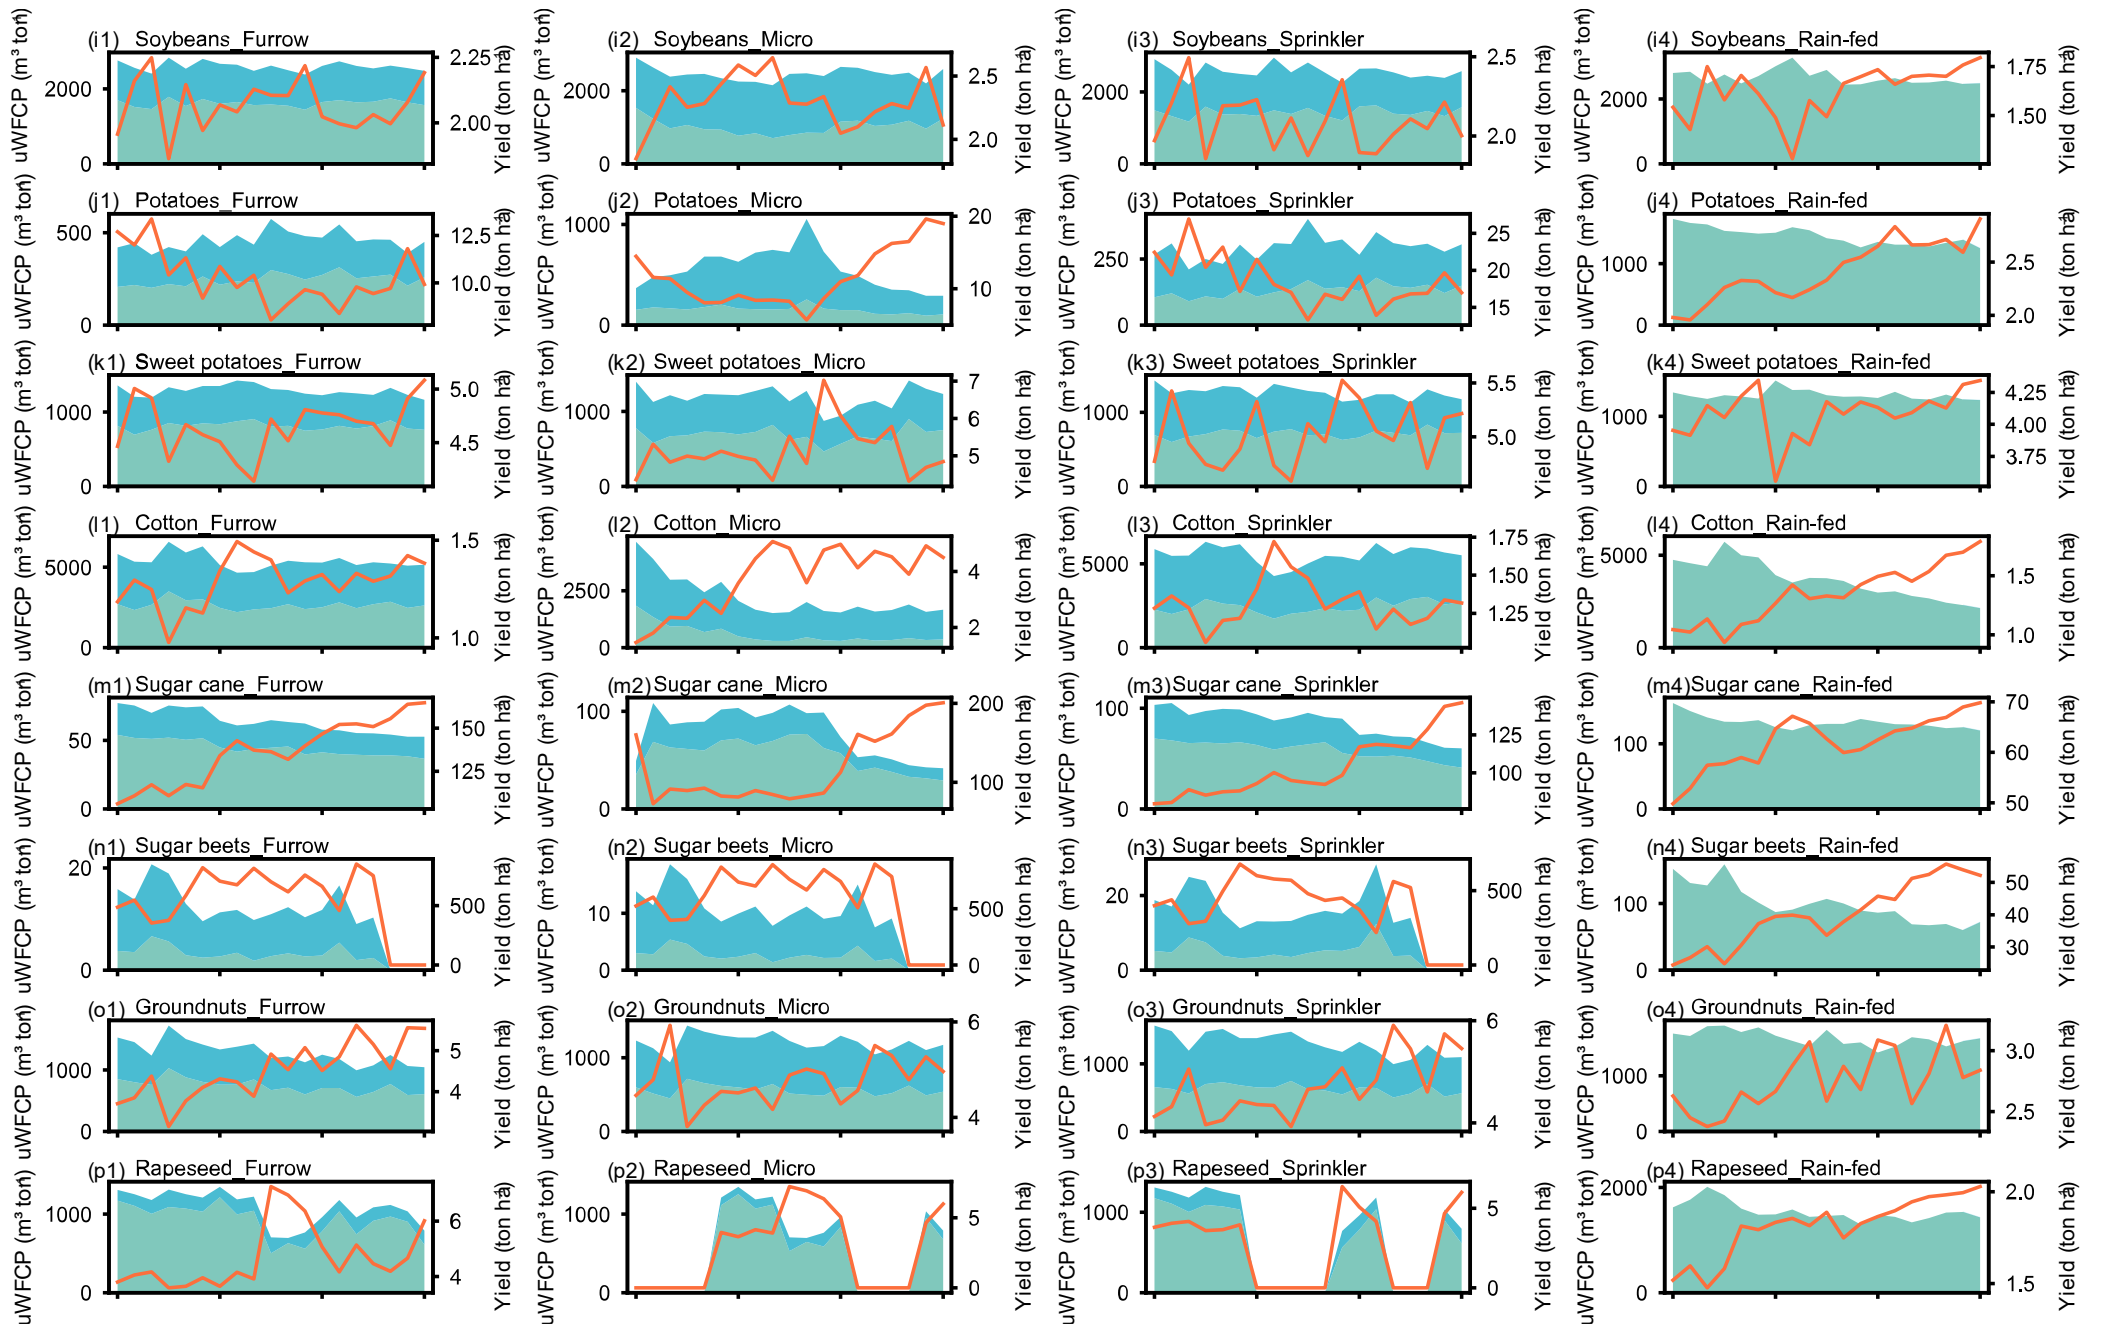

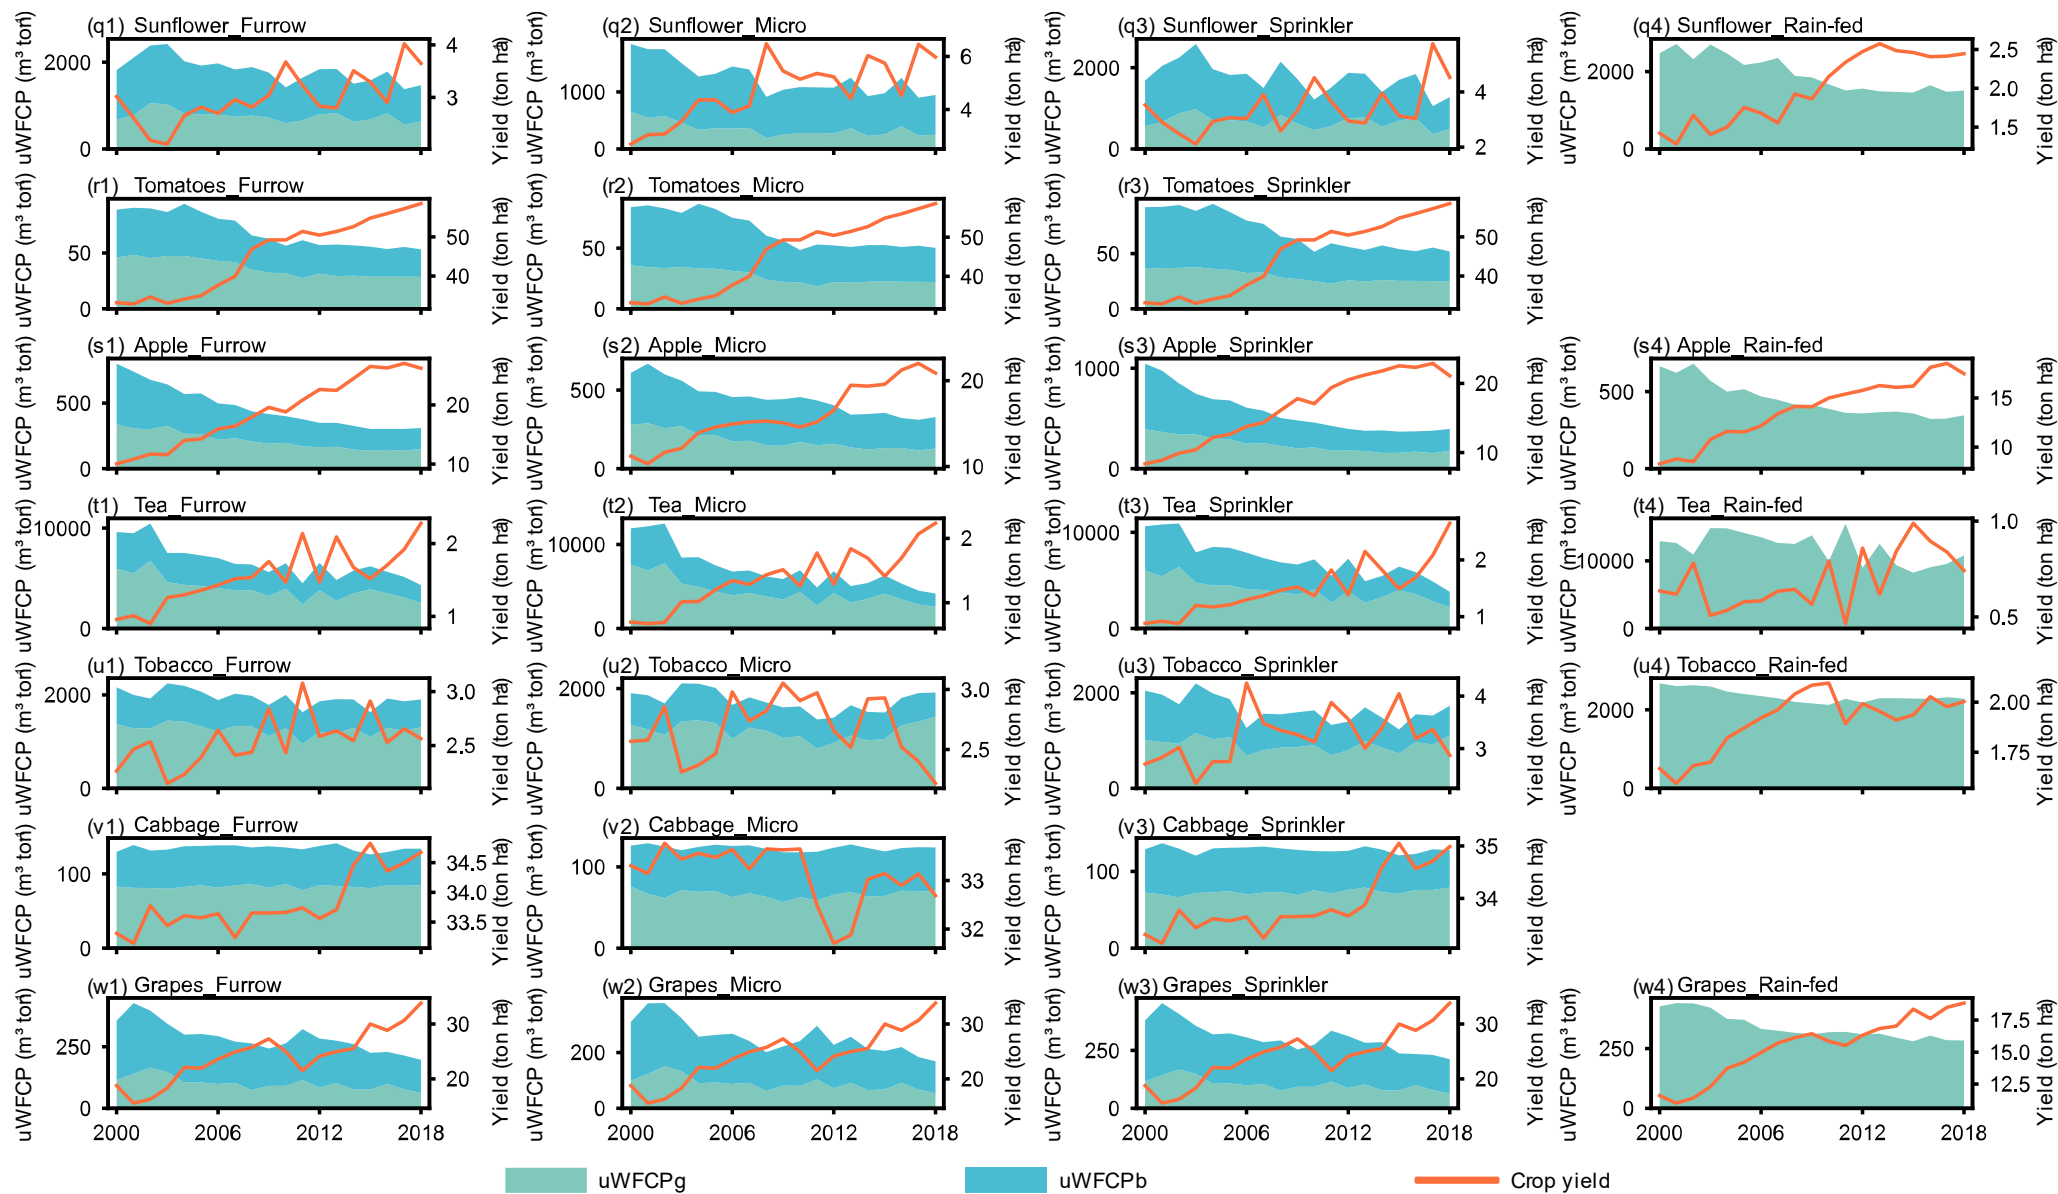

Fig. S15 Interannual variation in uWFCPb, uWFCPg and yield under different water supply and irrigation practices over 2000-2018.

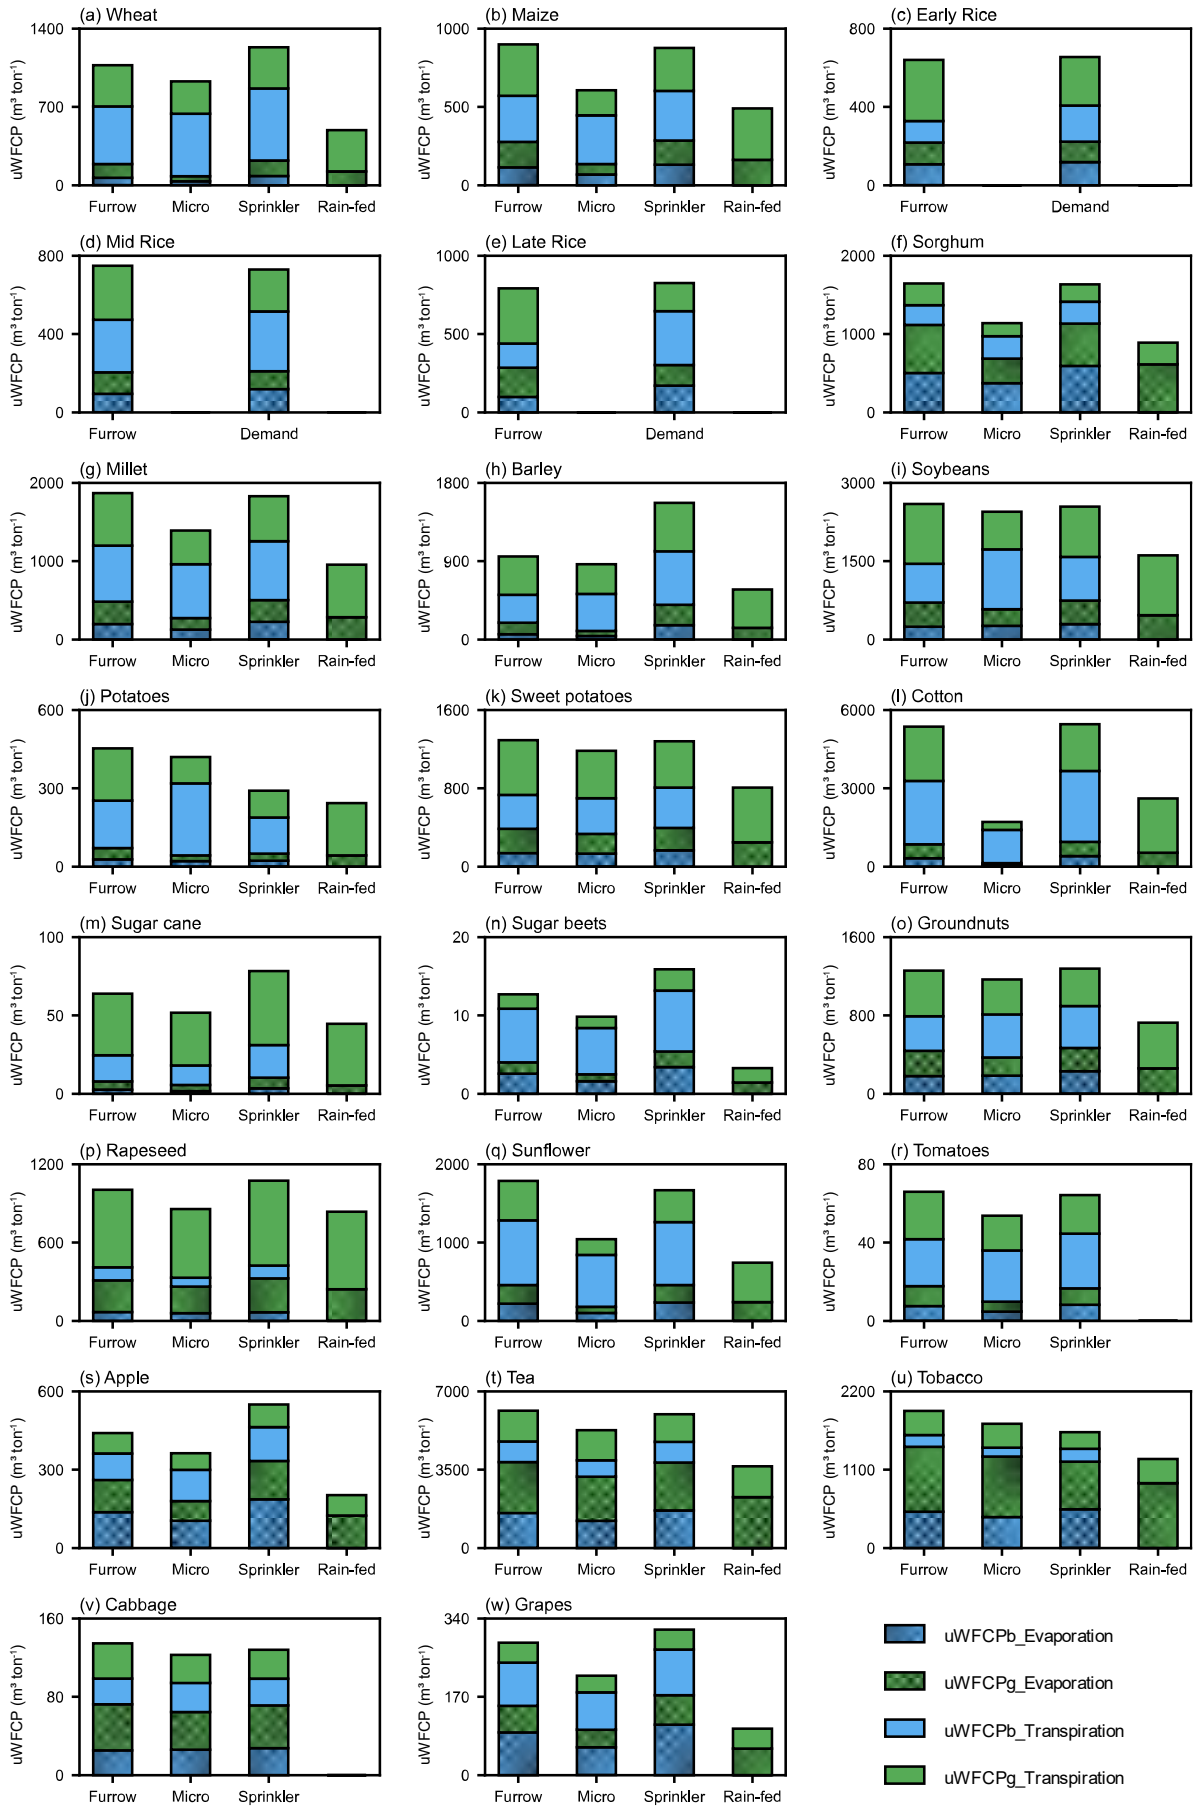

**Fig. S16** Proportion of blue and green water consumption for soil evaporation and crop transpiration under different water supply and irrigation practices.

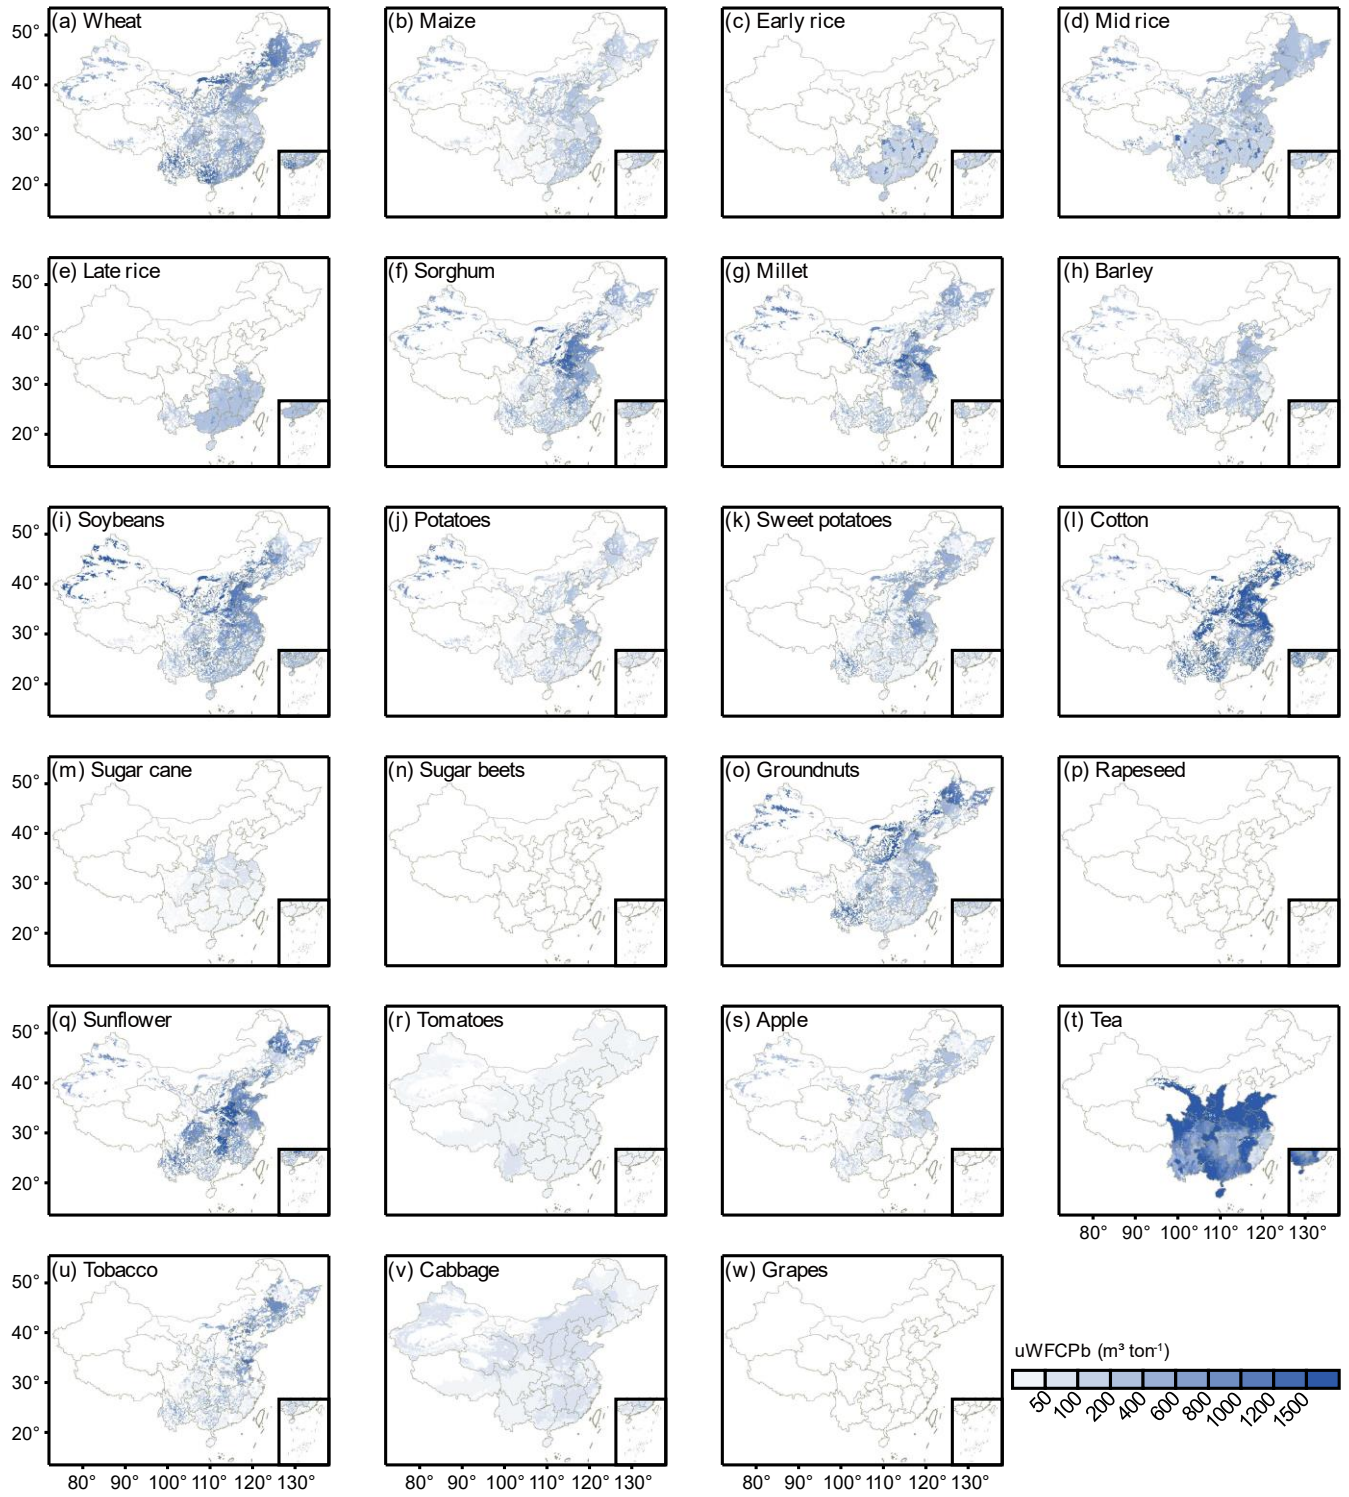

**Fig. S17 Gridded uWFCPb (annual average for 2010-2018).**

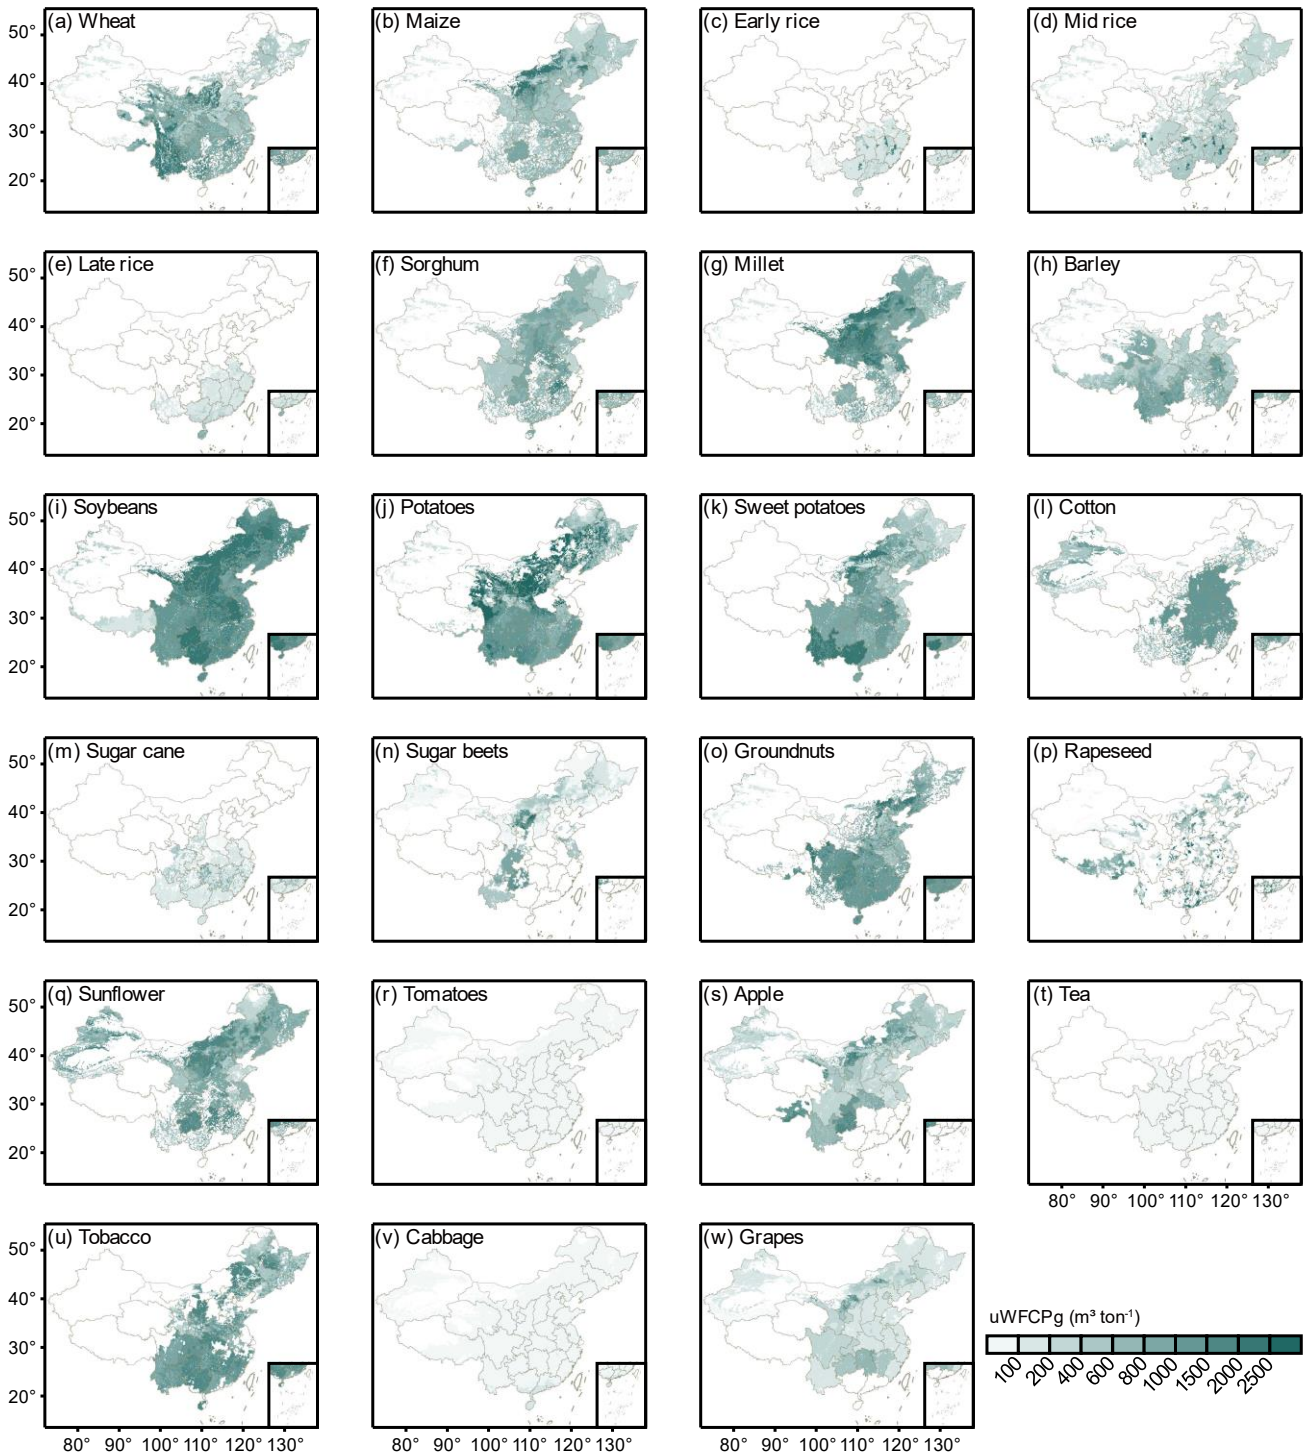

**Fig. S18 Gridded uWFCPg (annual average for 2010-2018).**



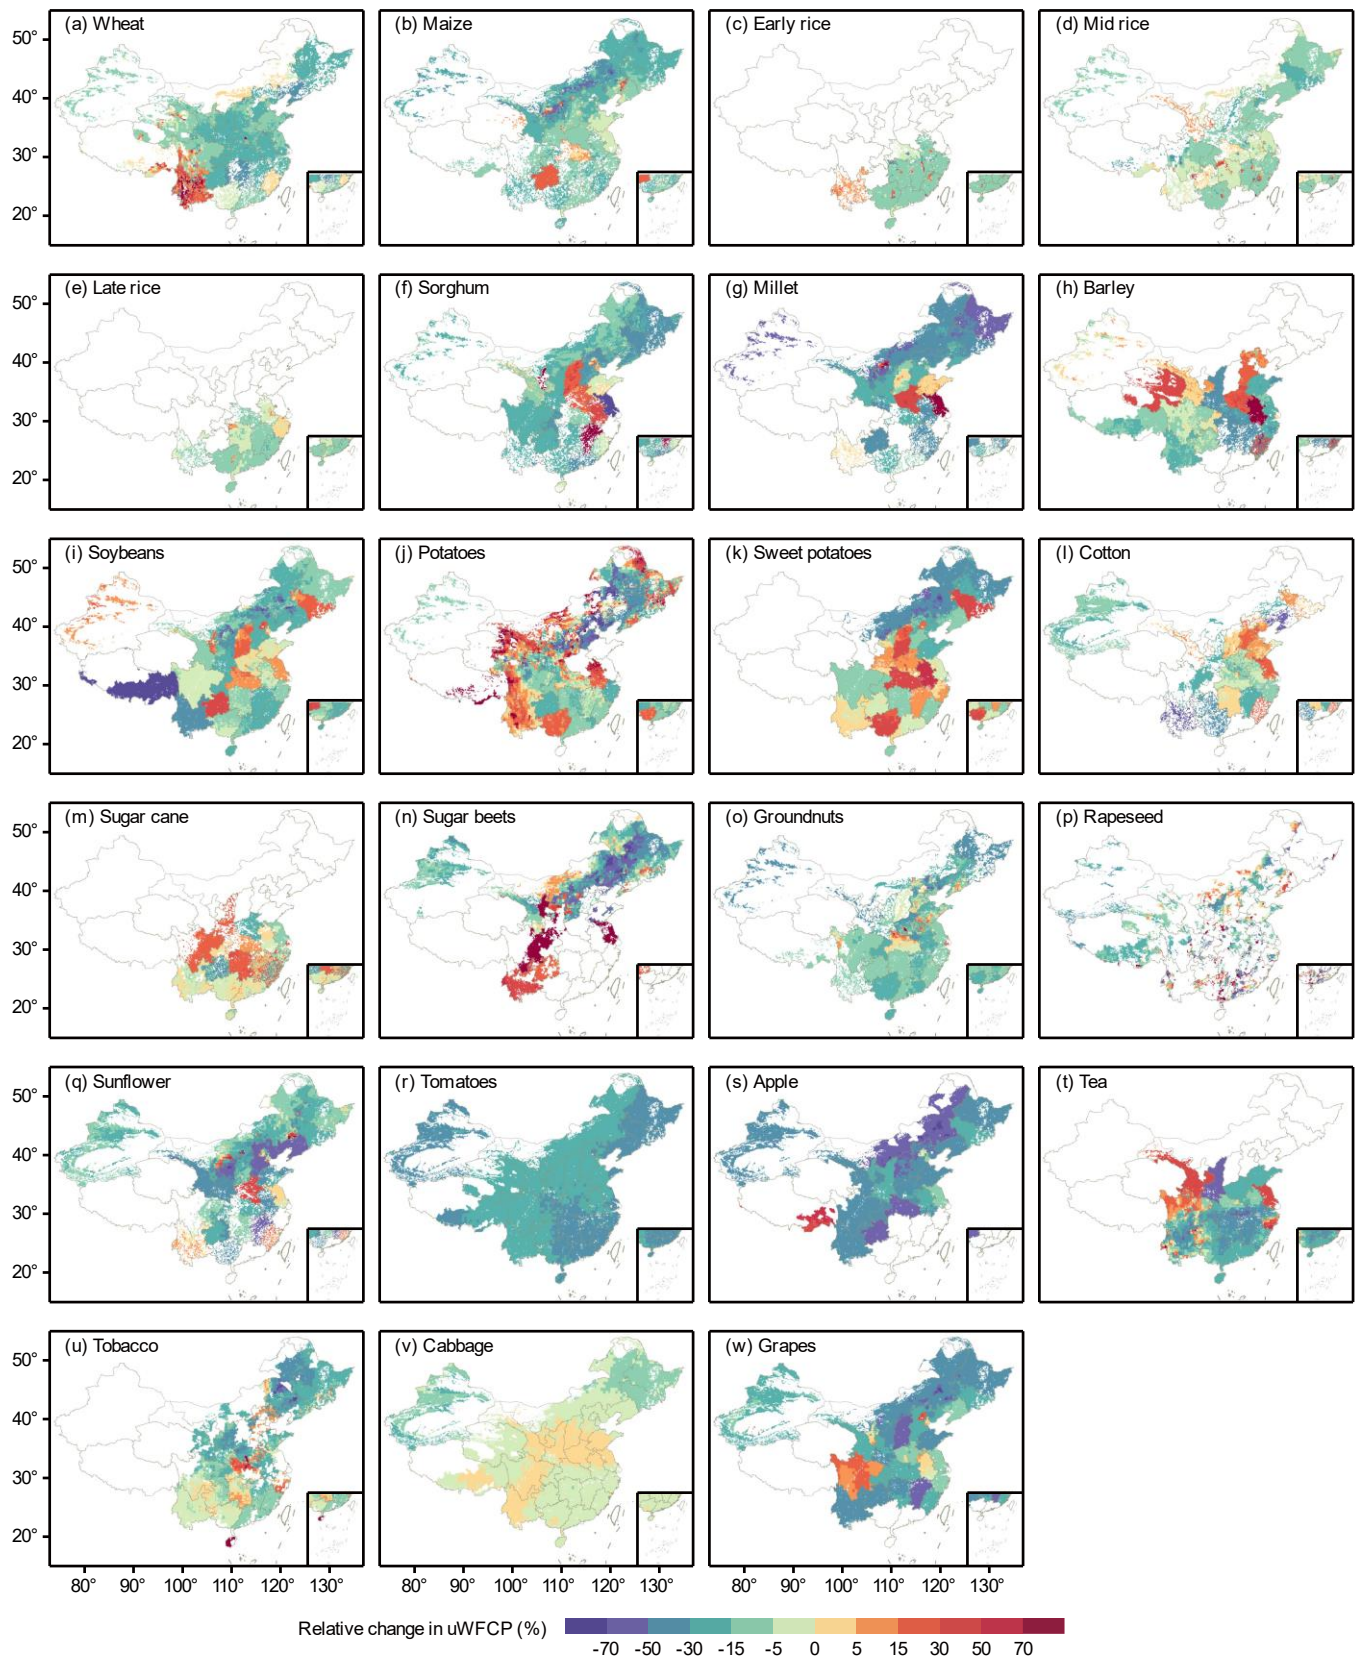

Fig. S19 Relative changes of the average gridded uWFCP for 2000-2009 to that for 2010-2018.

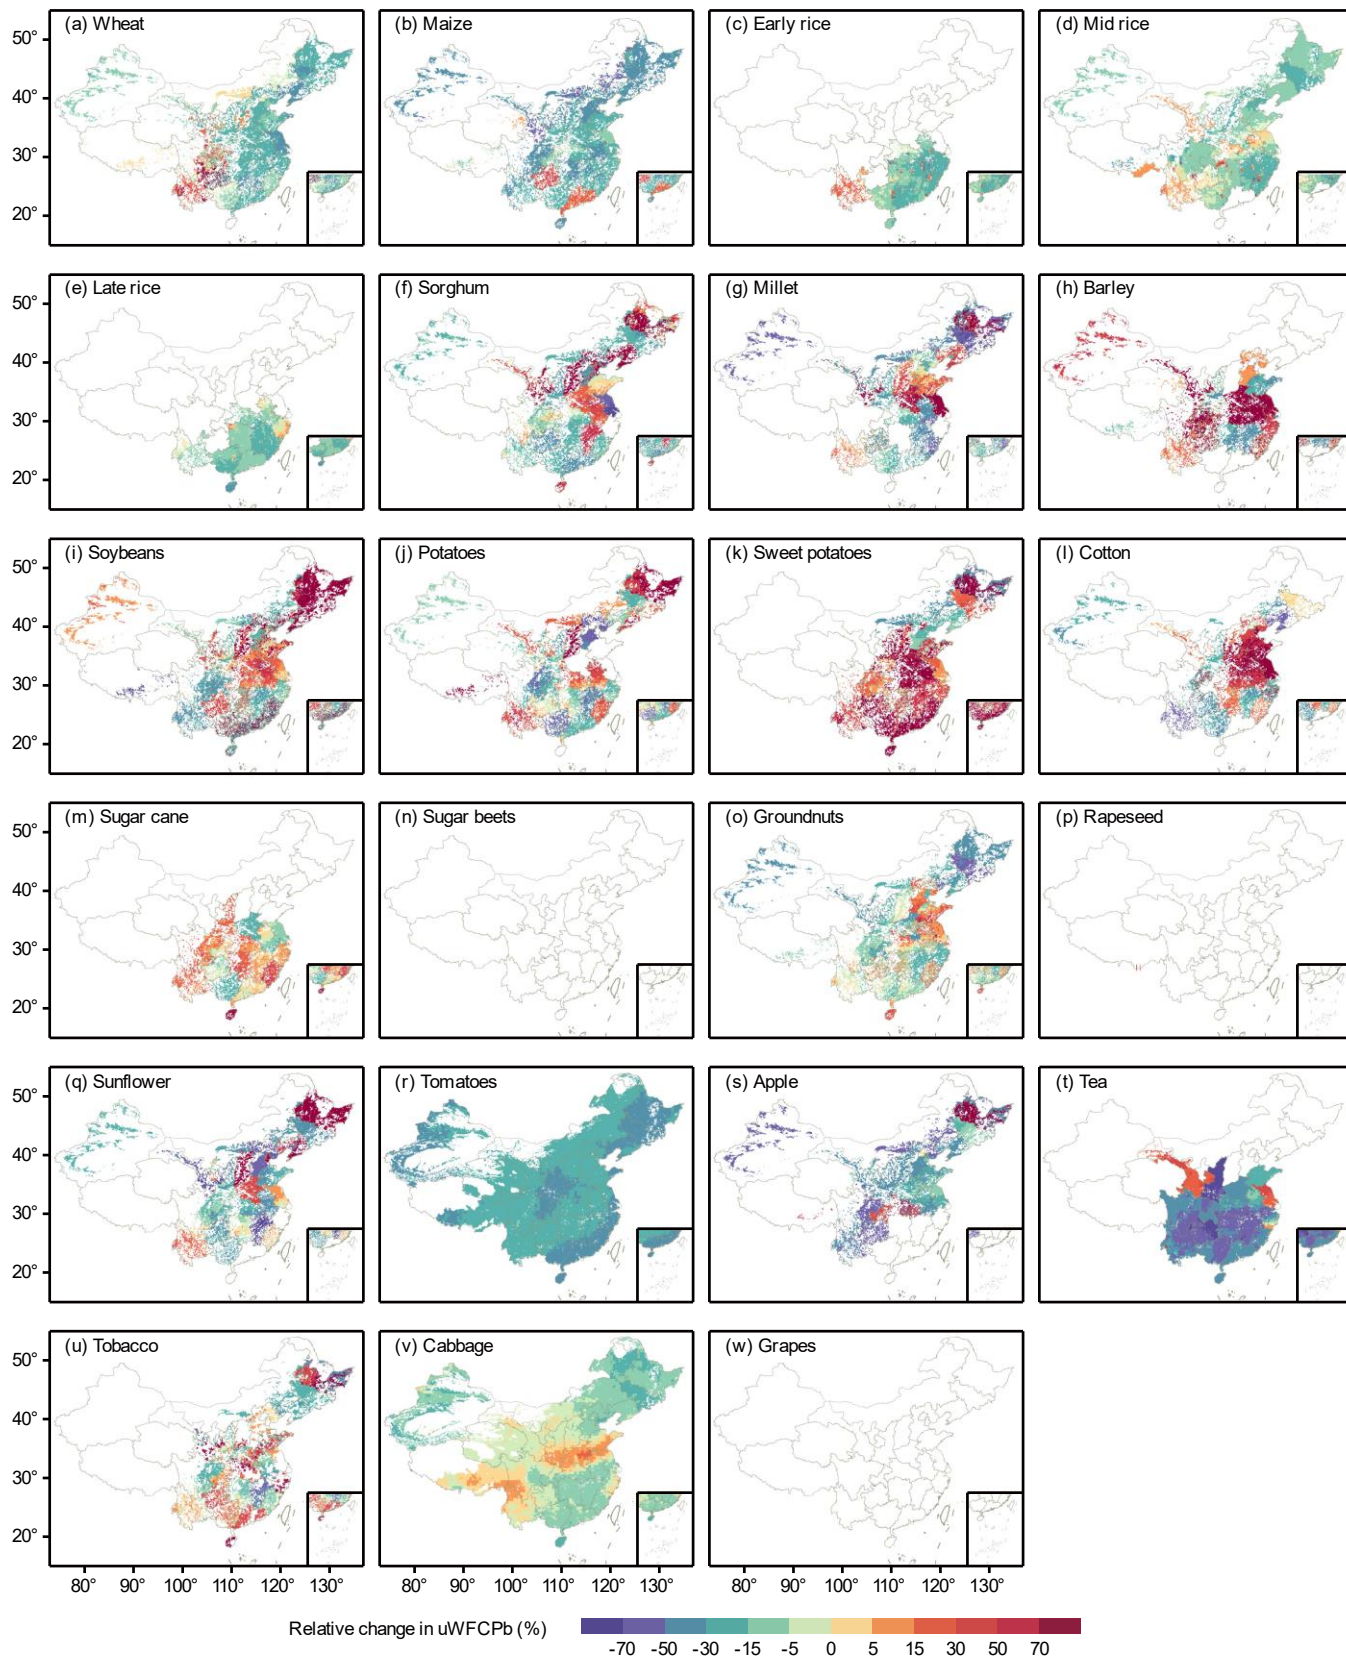

Fig. S20 Relative changes of the average gridded uWFCPb for 2000-2009 to that for 2010-2018.

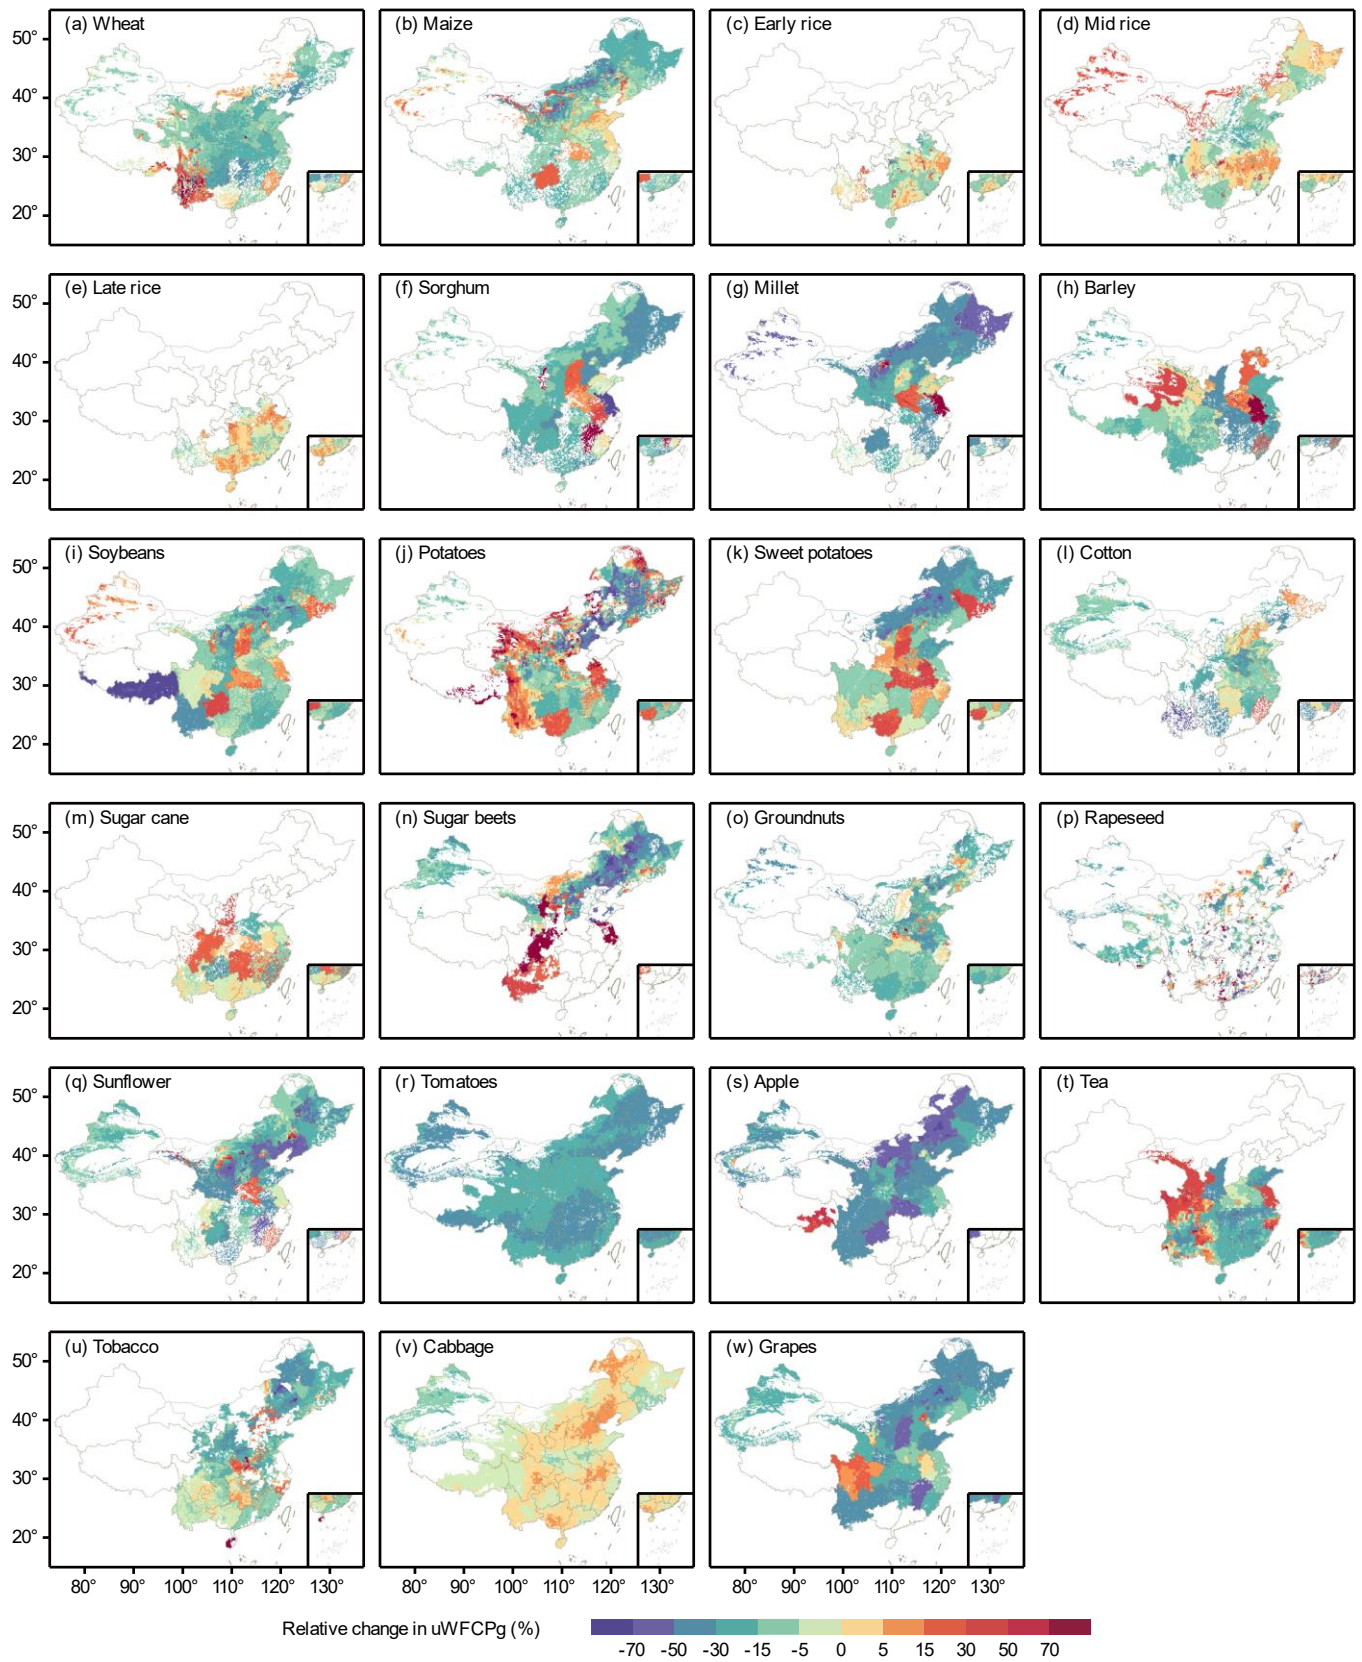

**Fig. S21** Relative changes of the average gridded uWFCPg for 2000-2009 to that for 2010-2018.

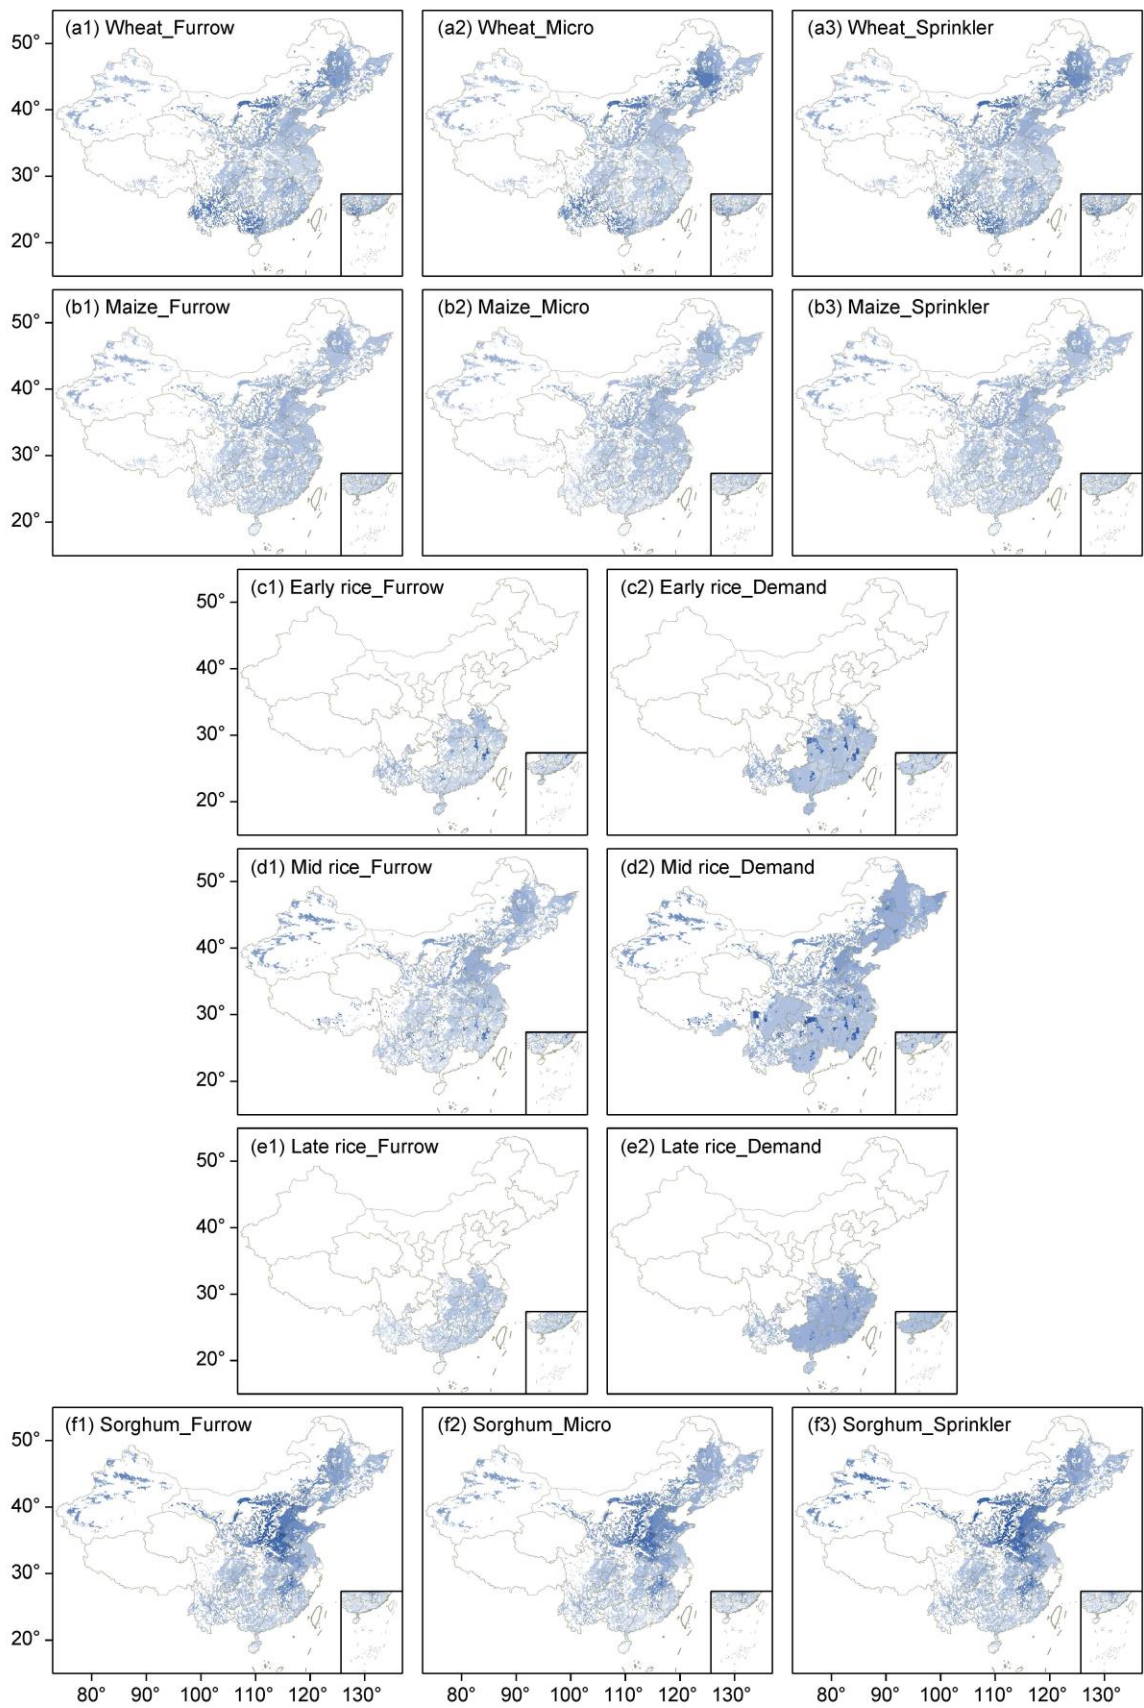

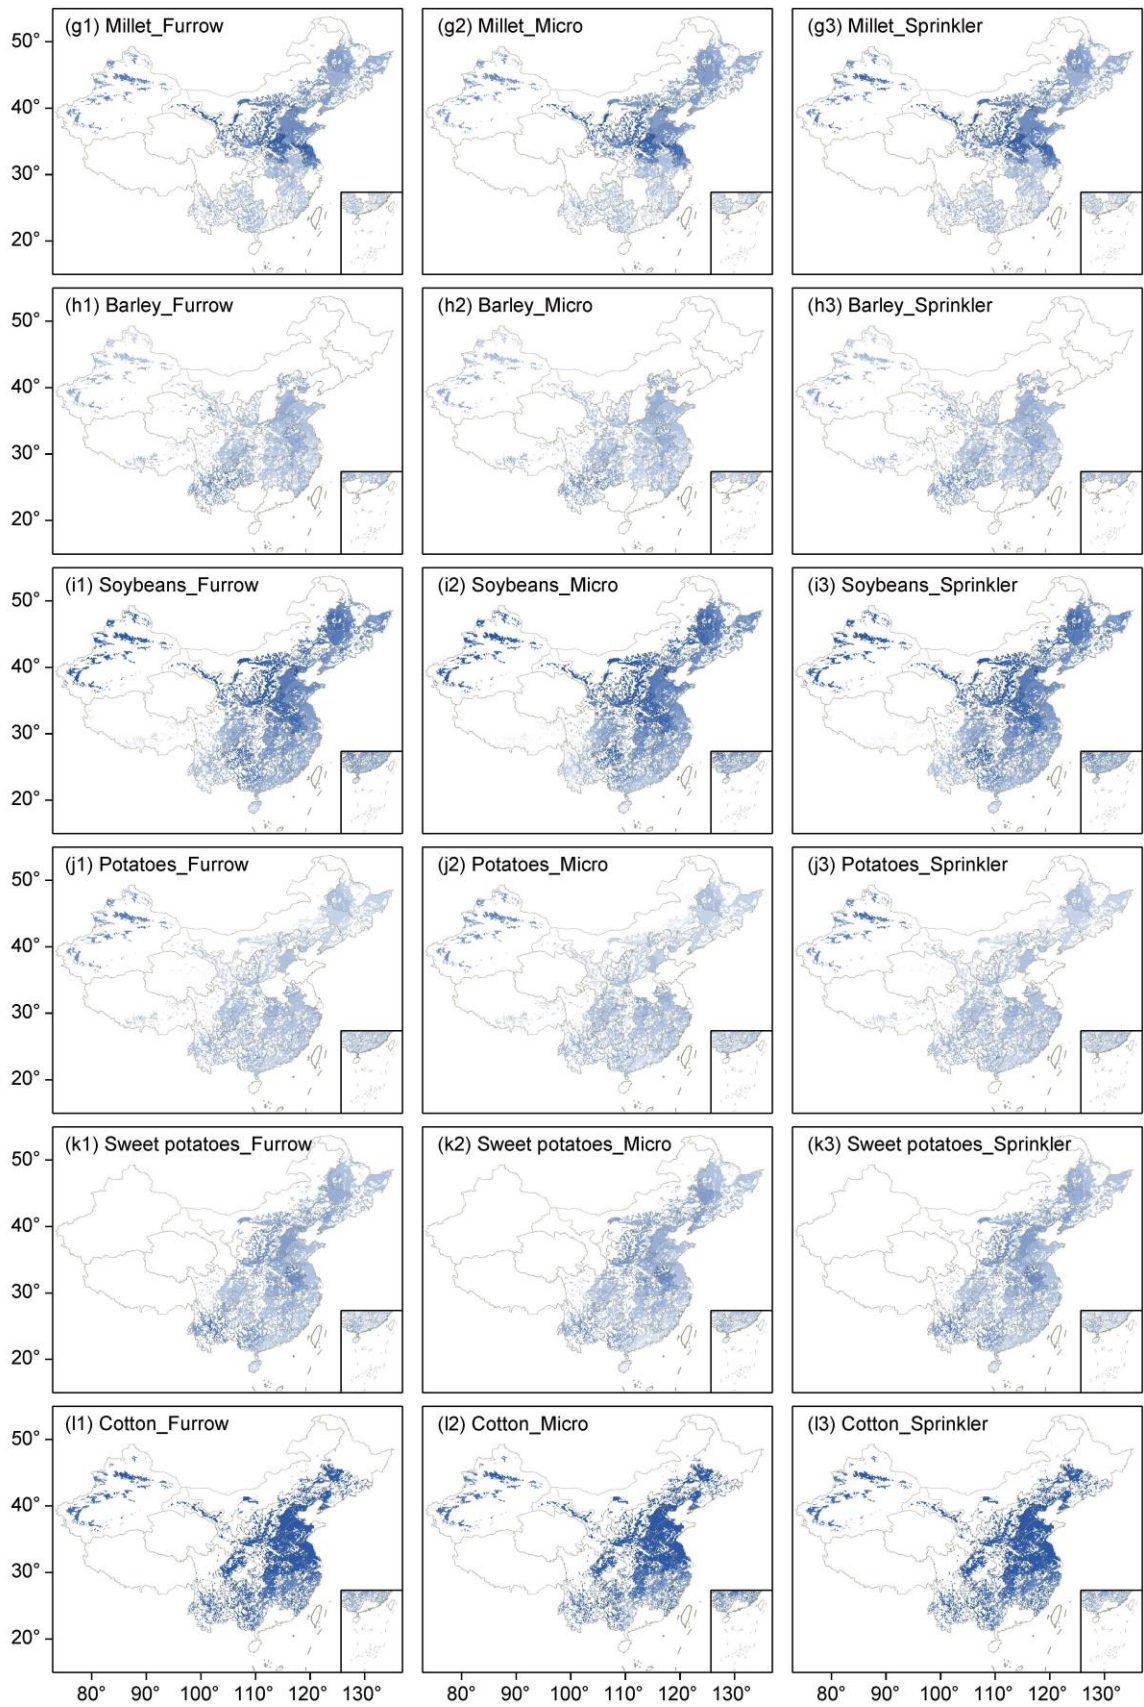

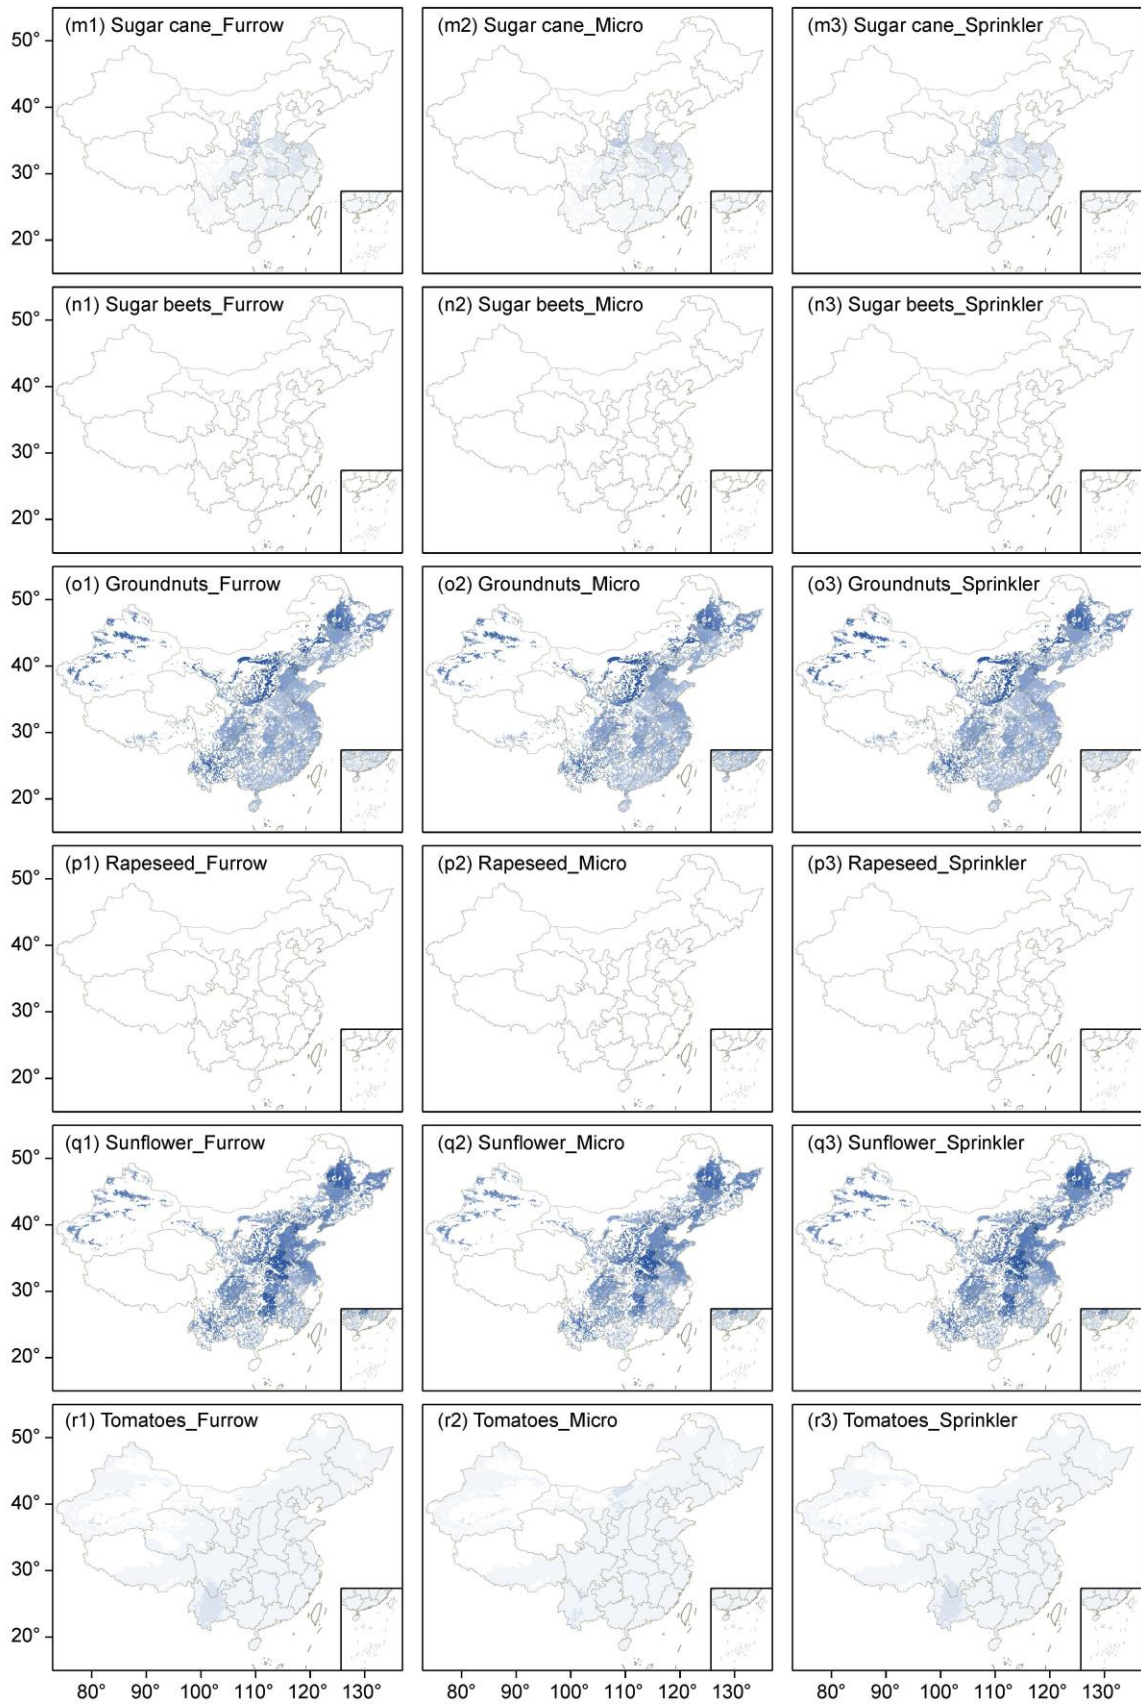

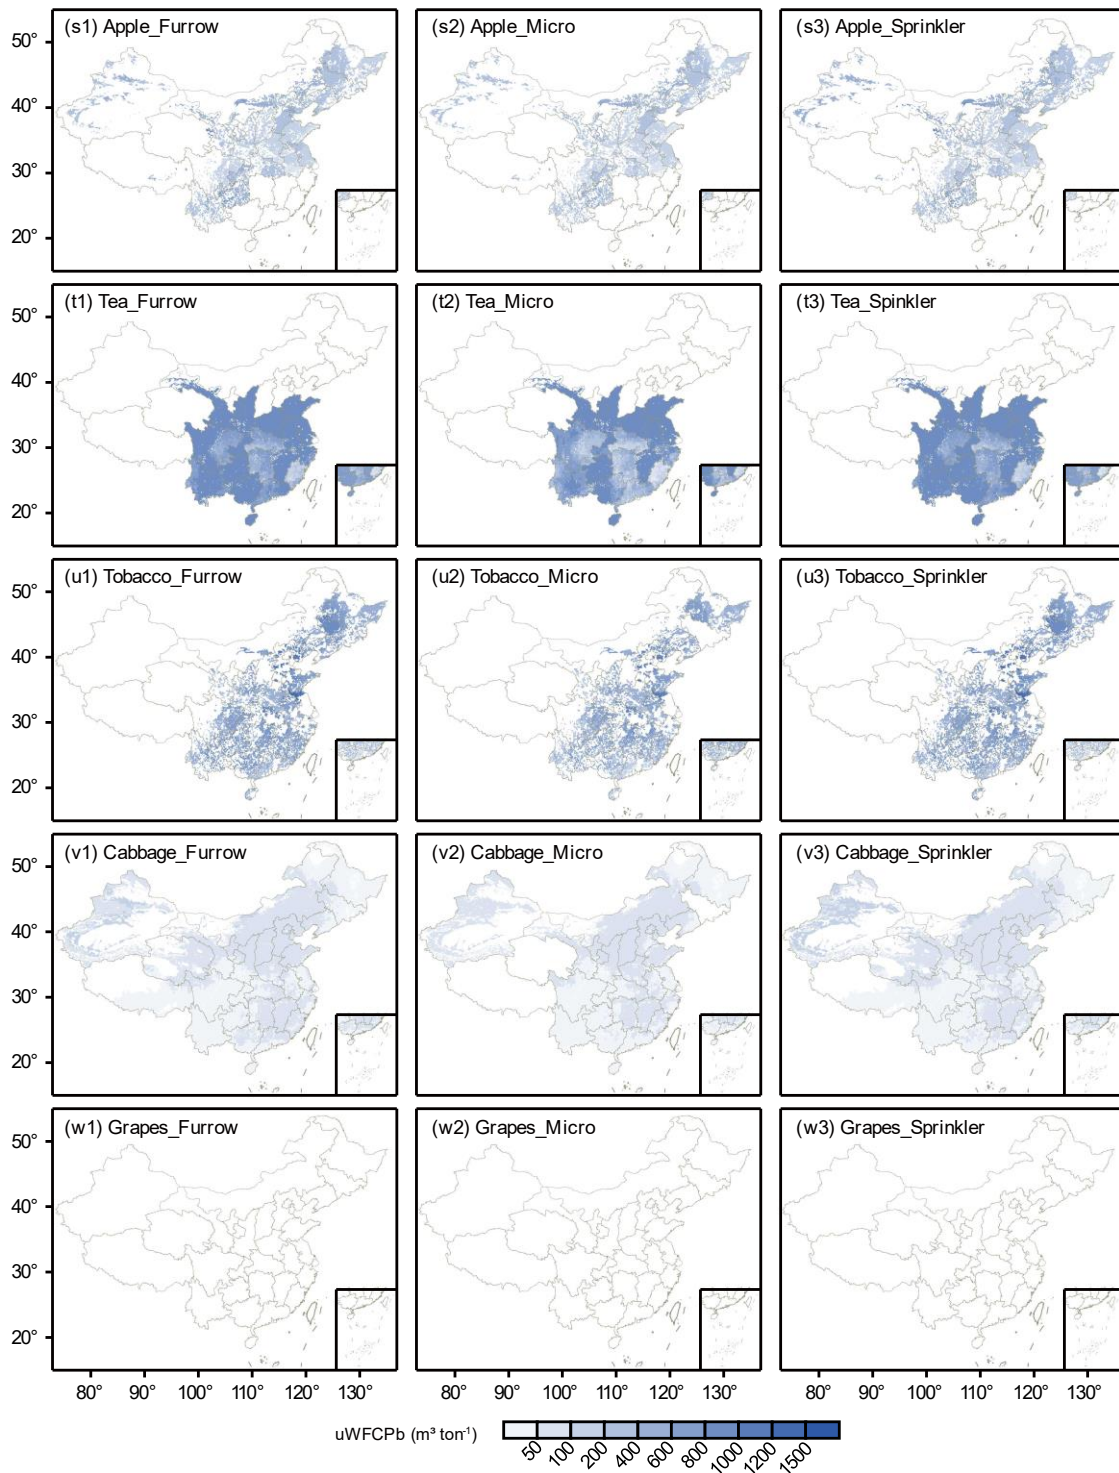

Fig. S22 Gridded uWFCPb (annual average for 2010-2018).

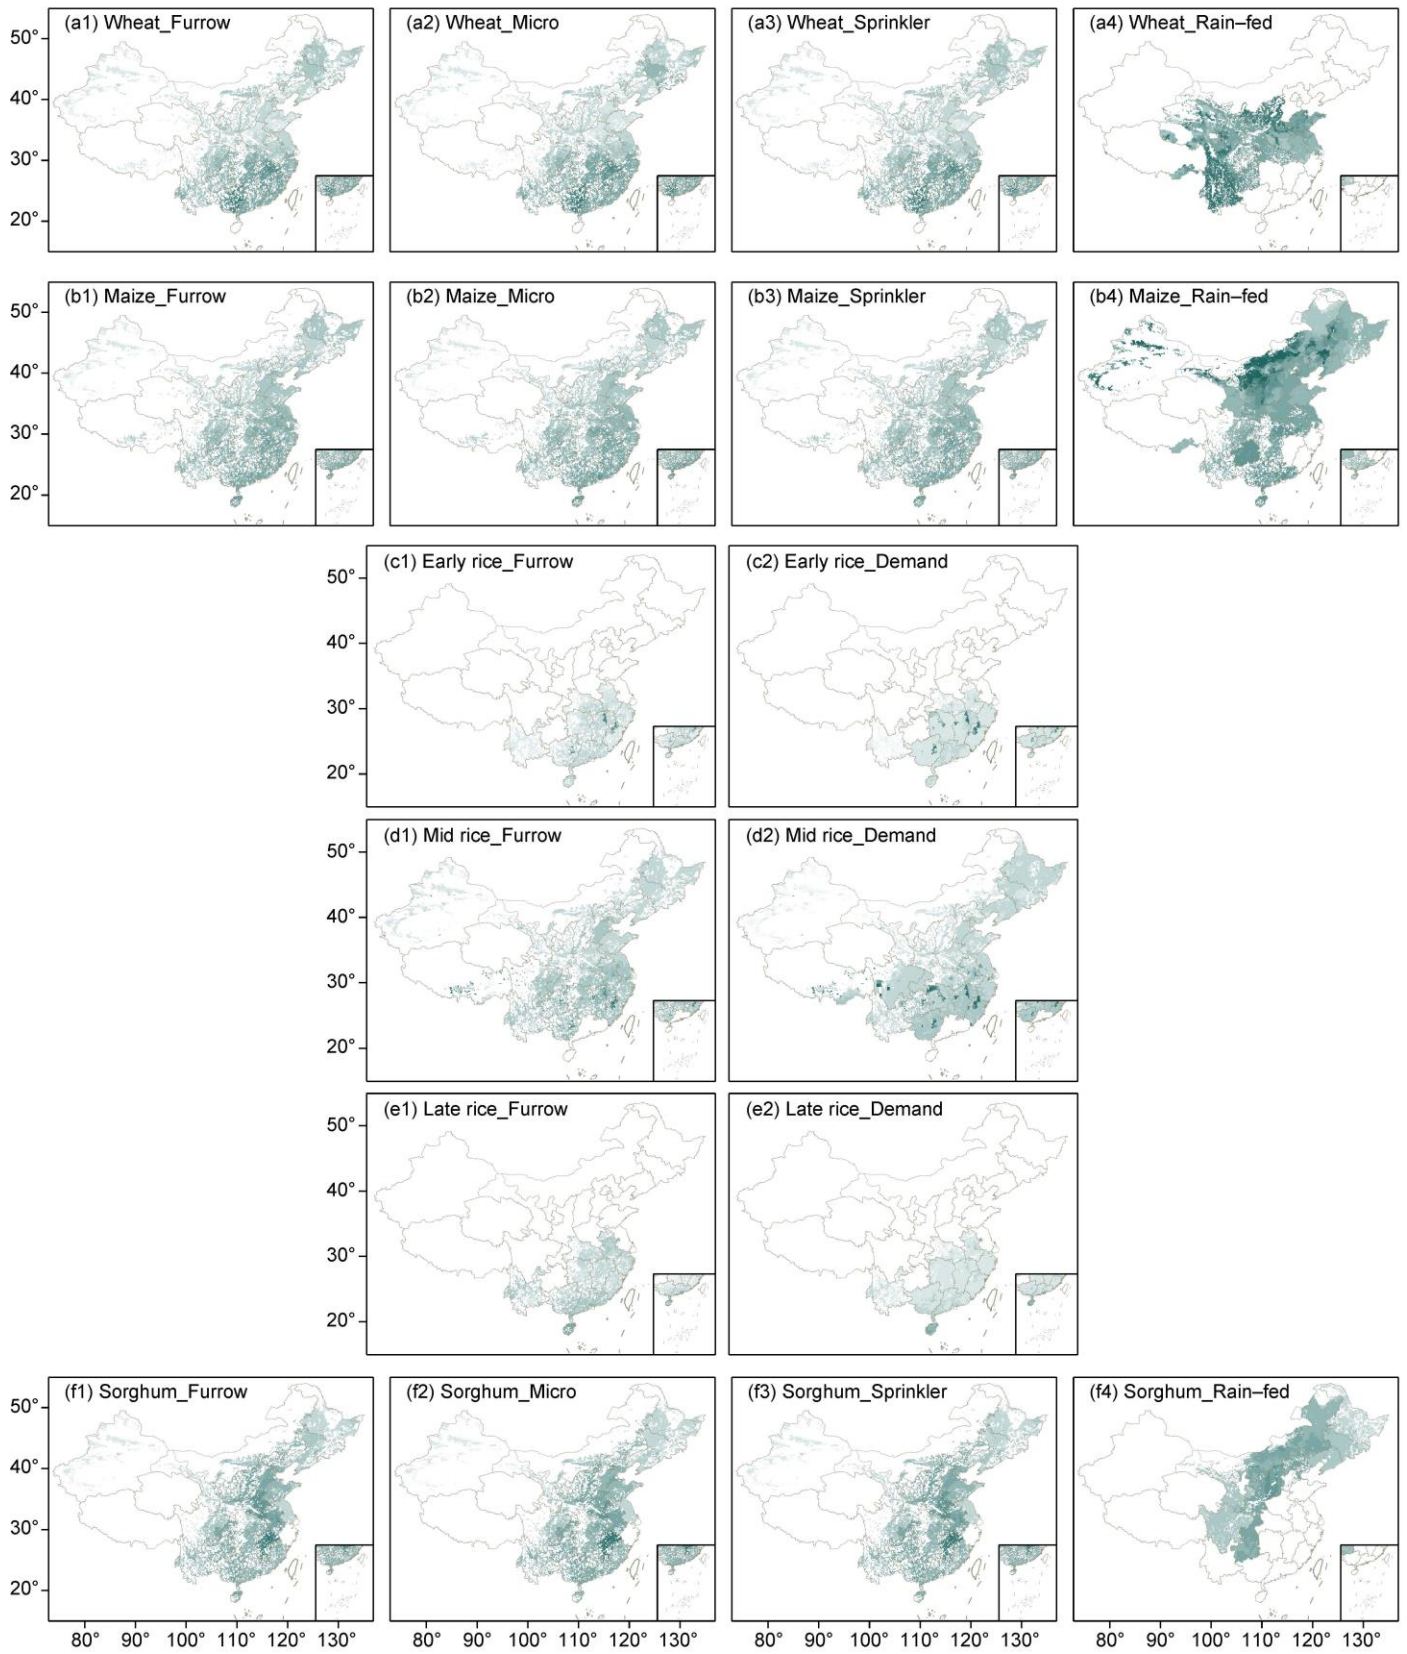



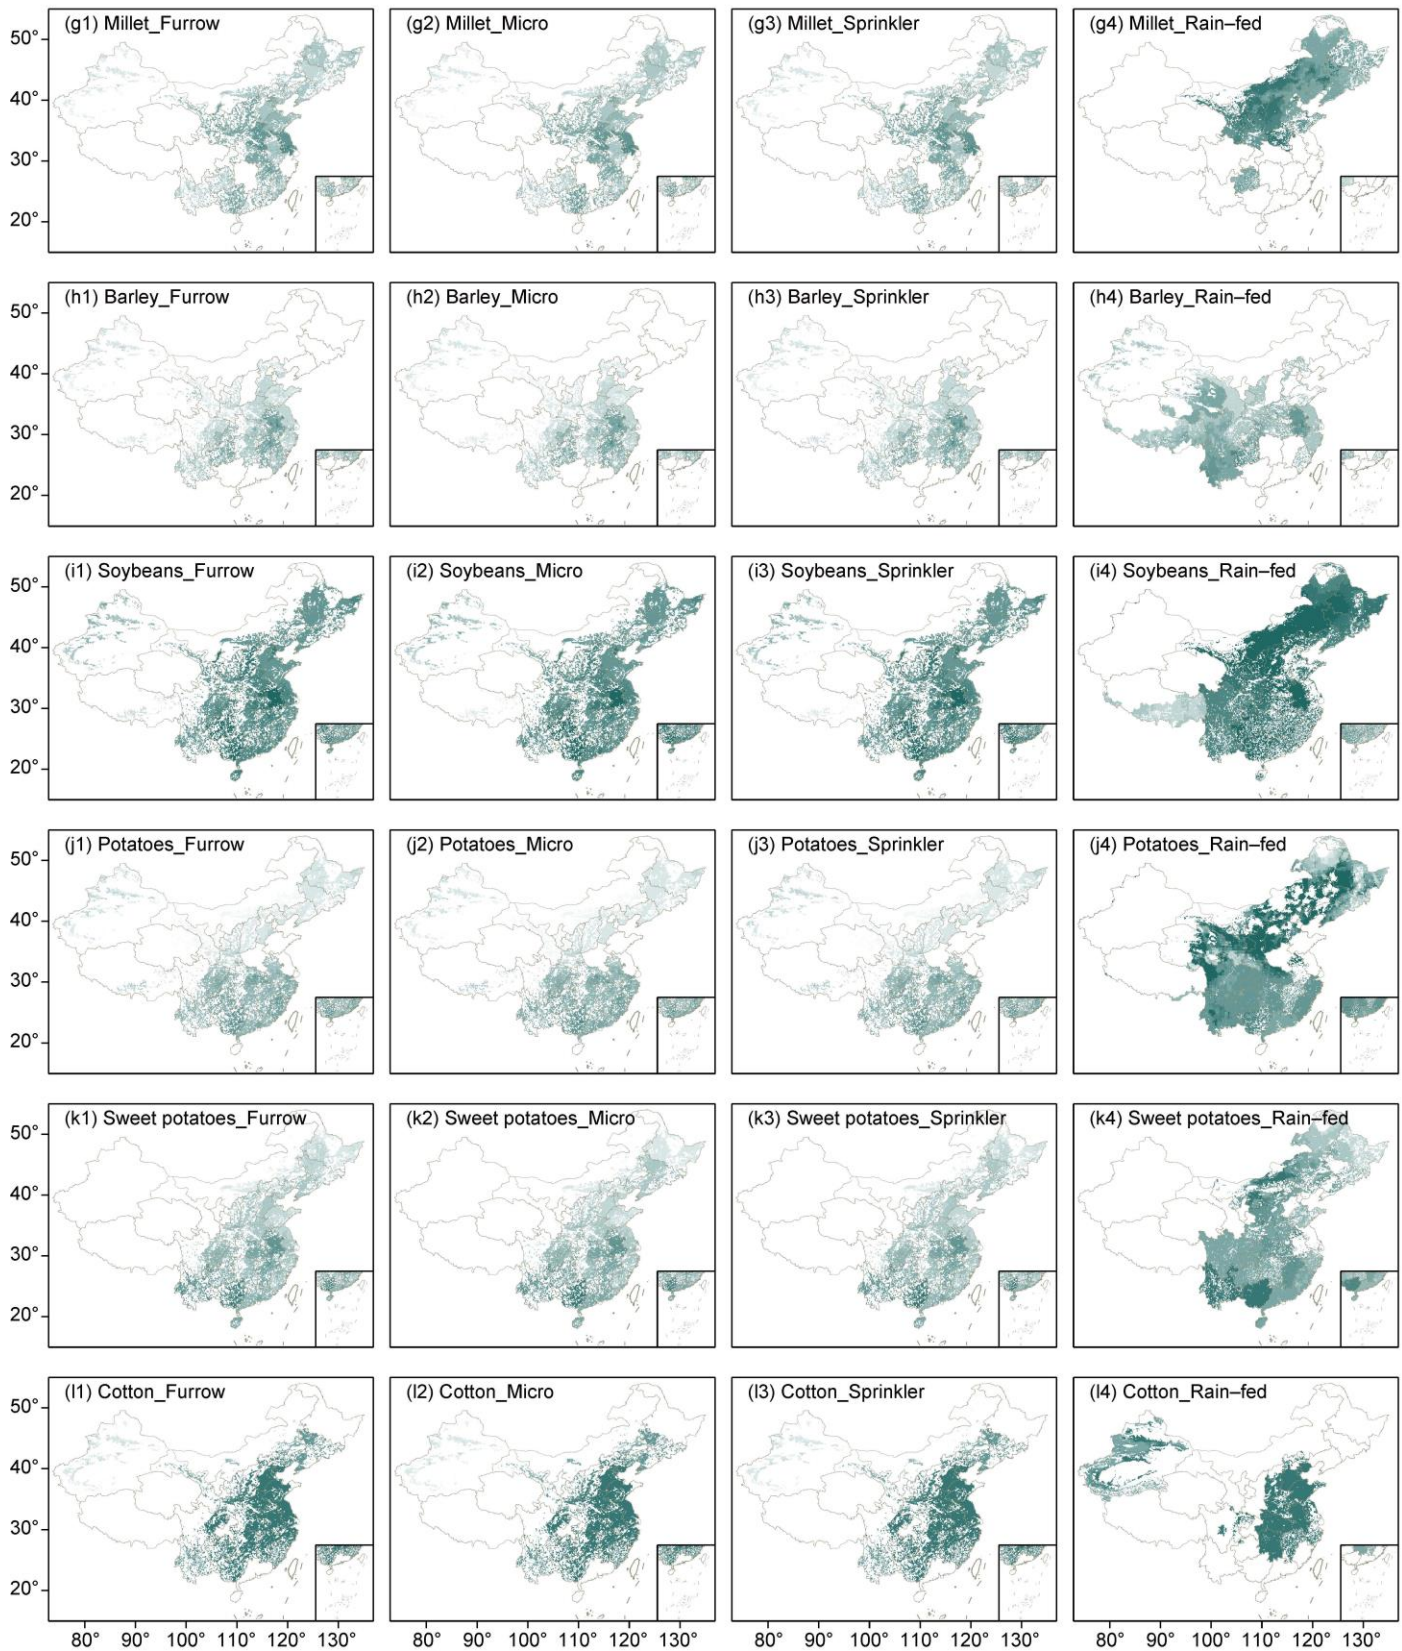

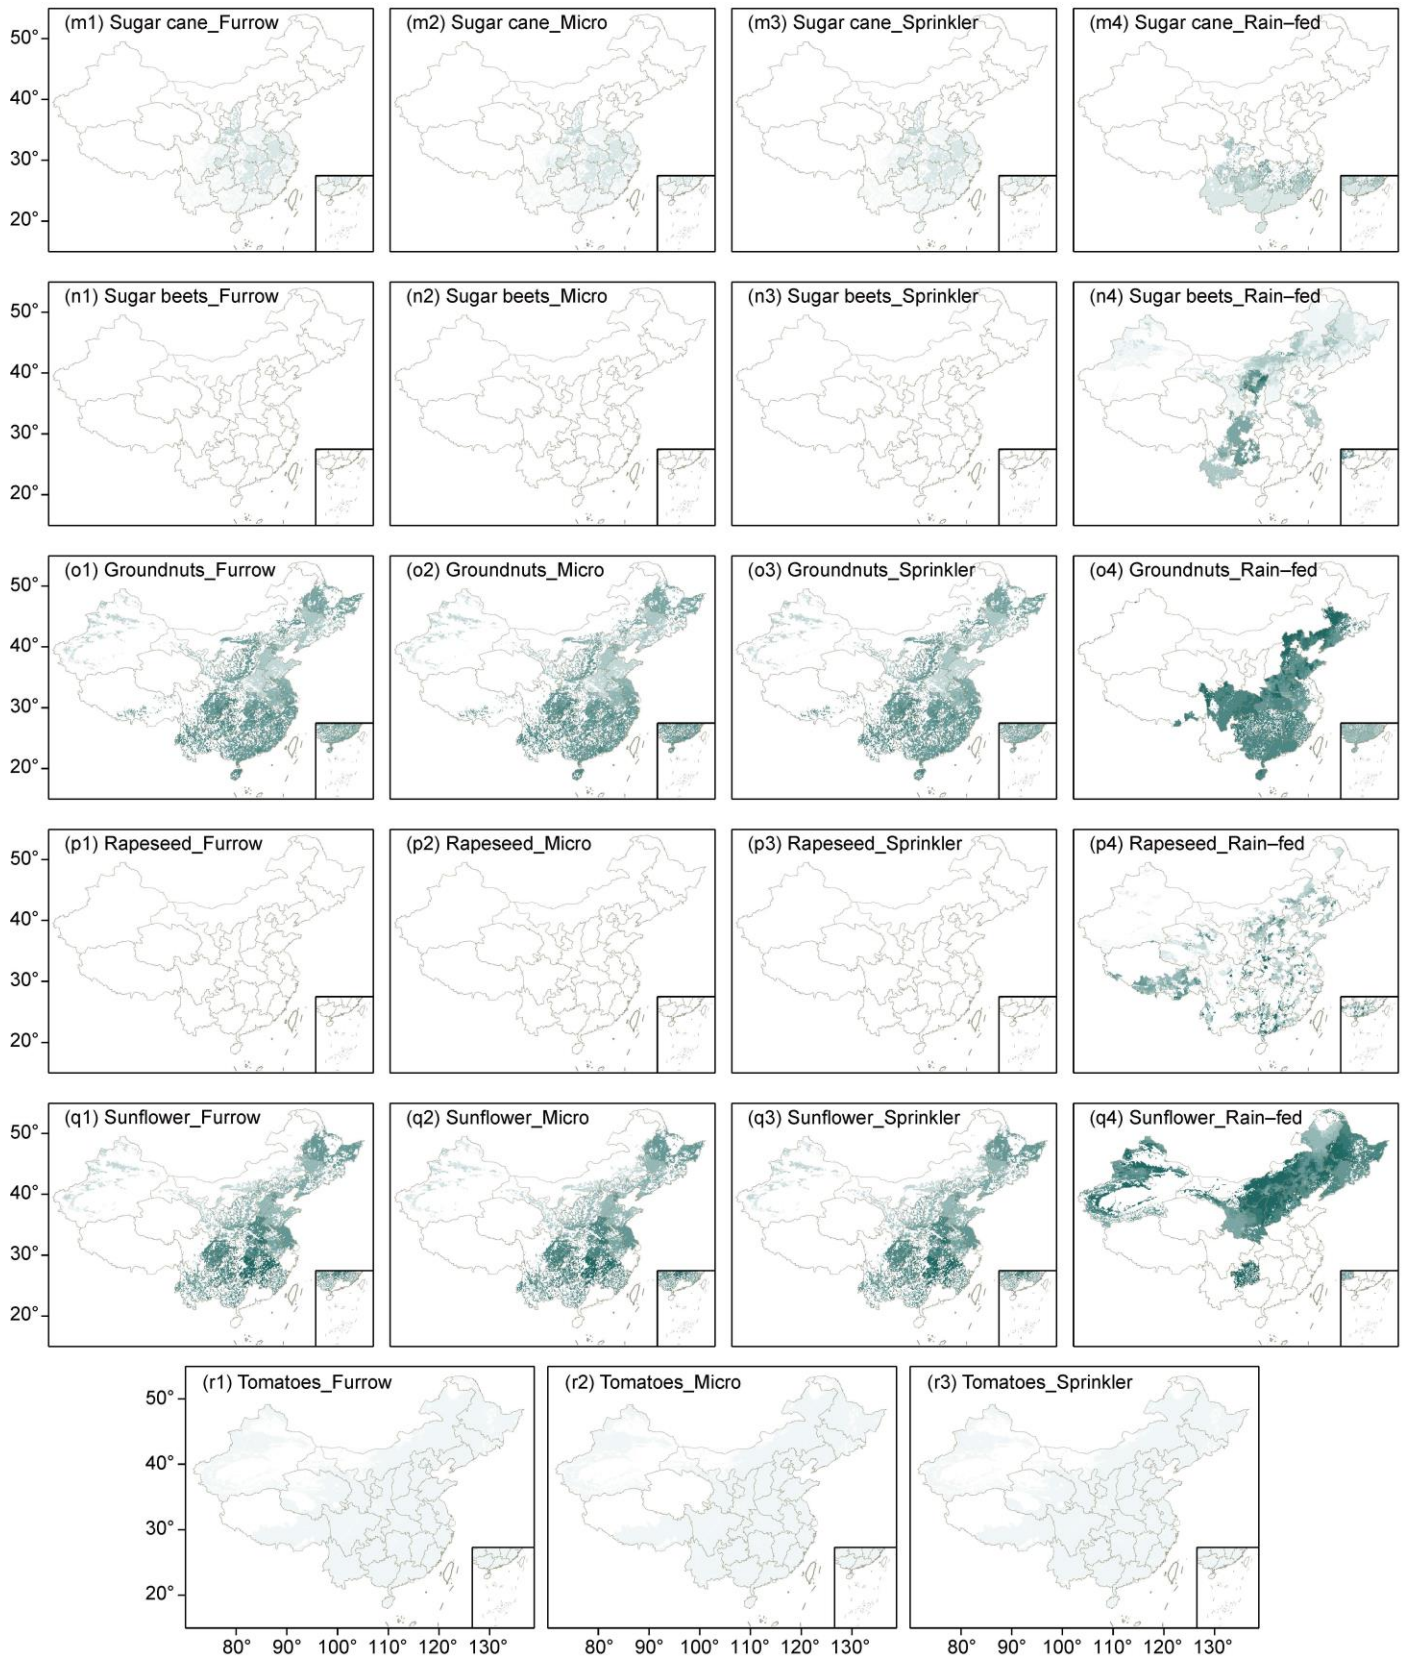

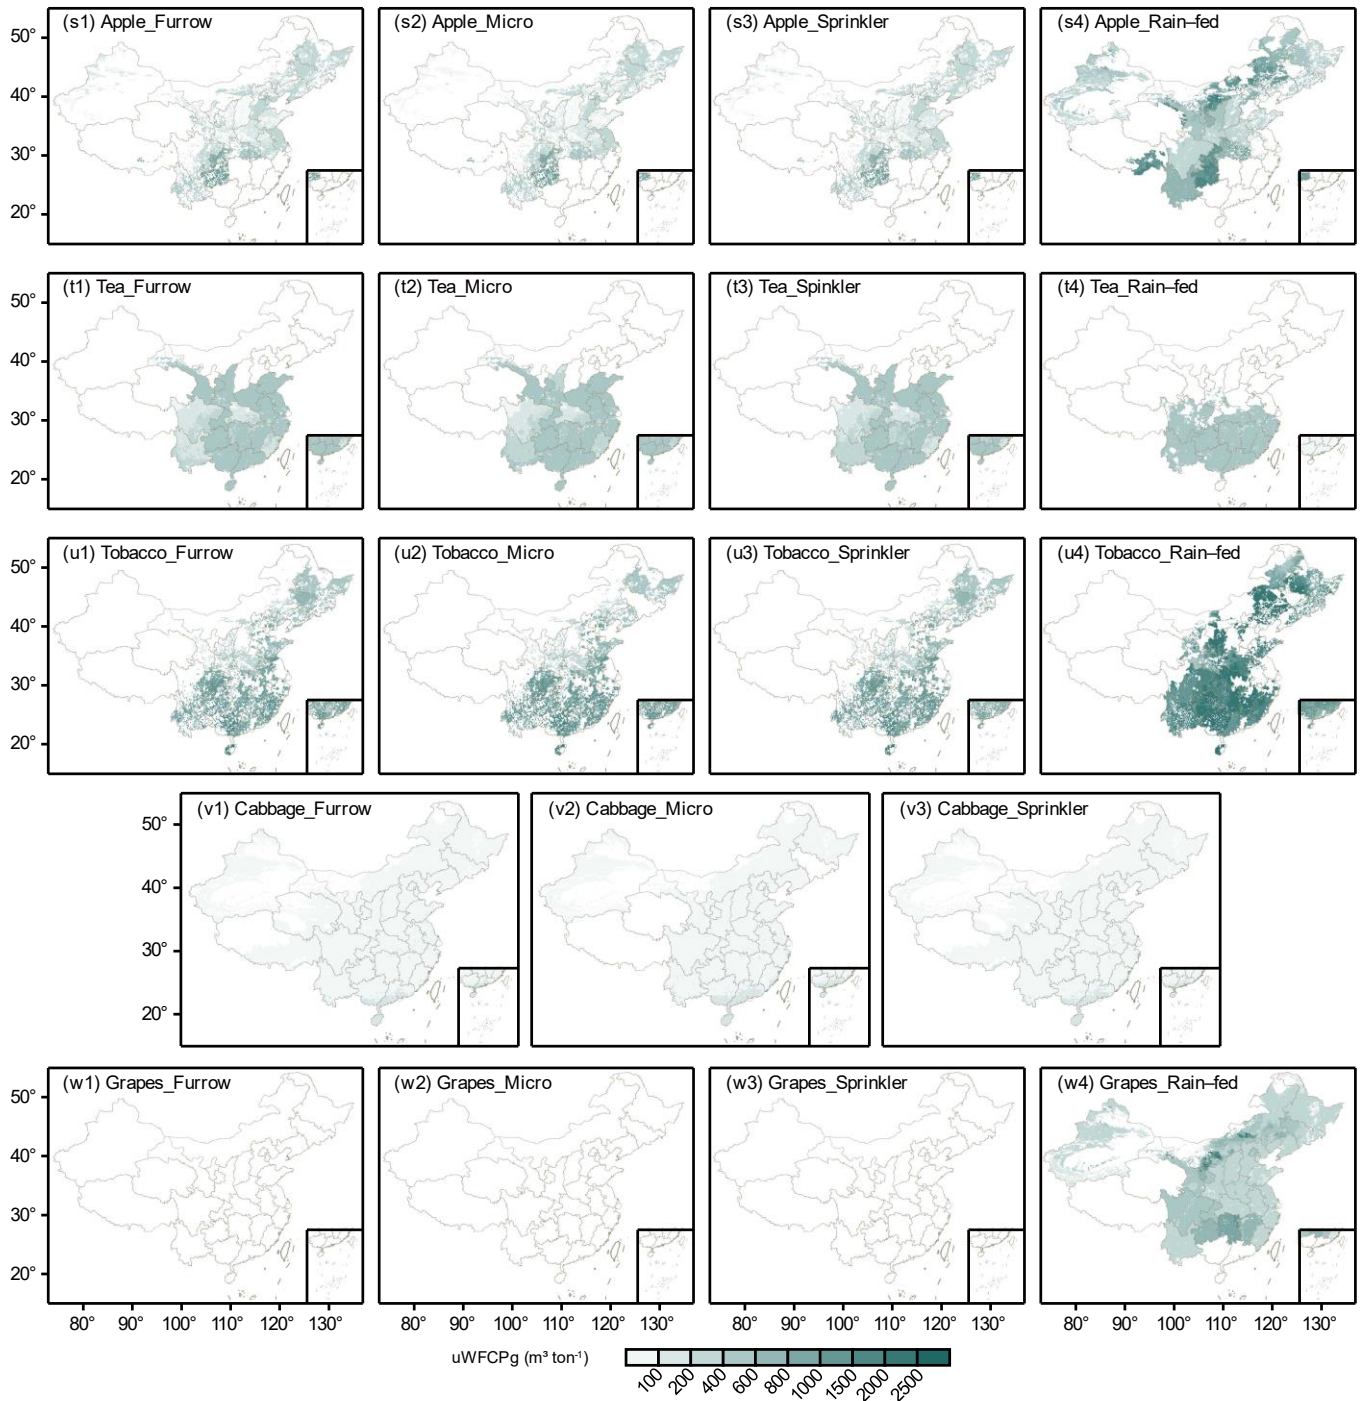

**Fig. S23 Gridded uWFCPg (annual average for 2010-2018).**

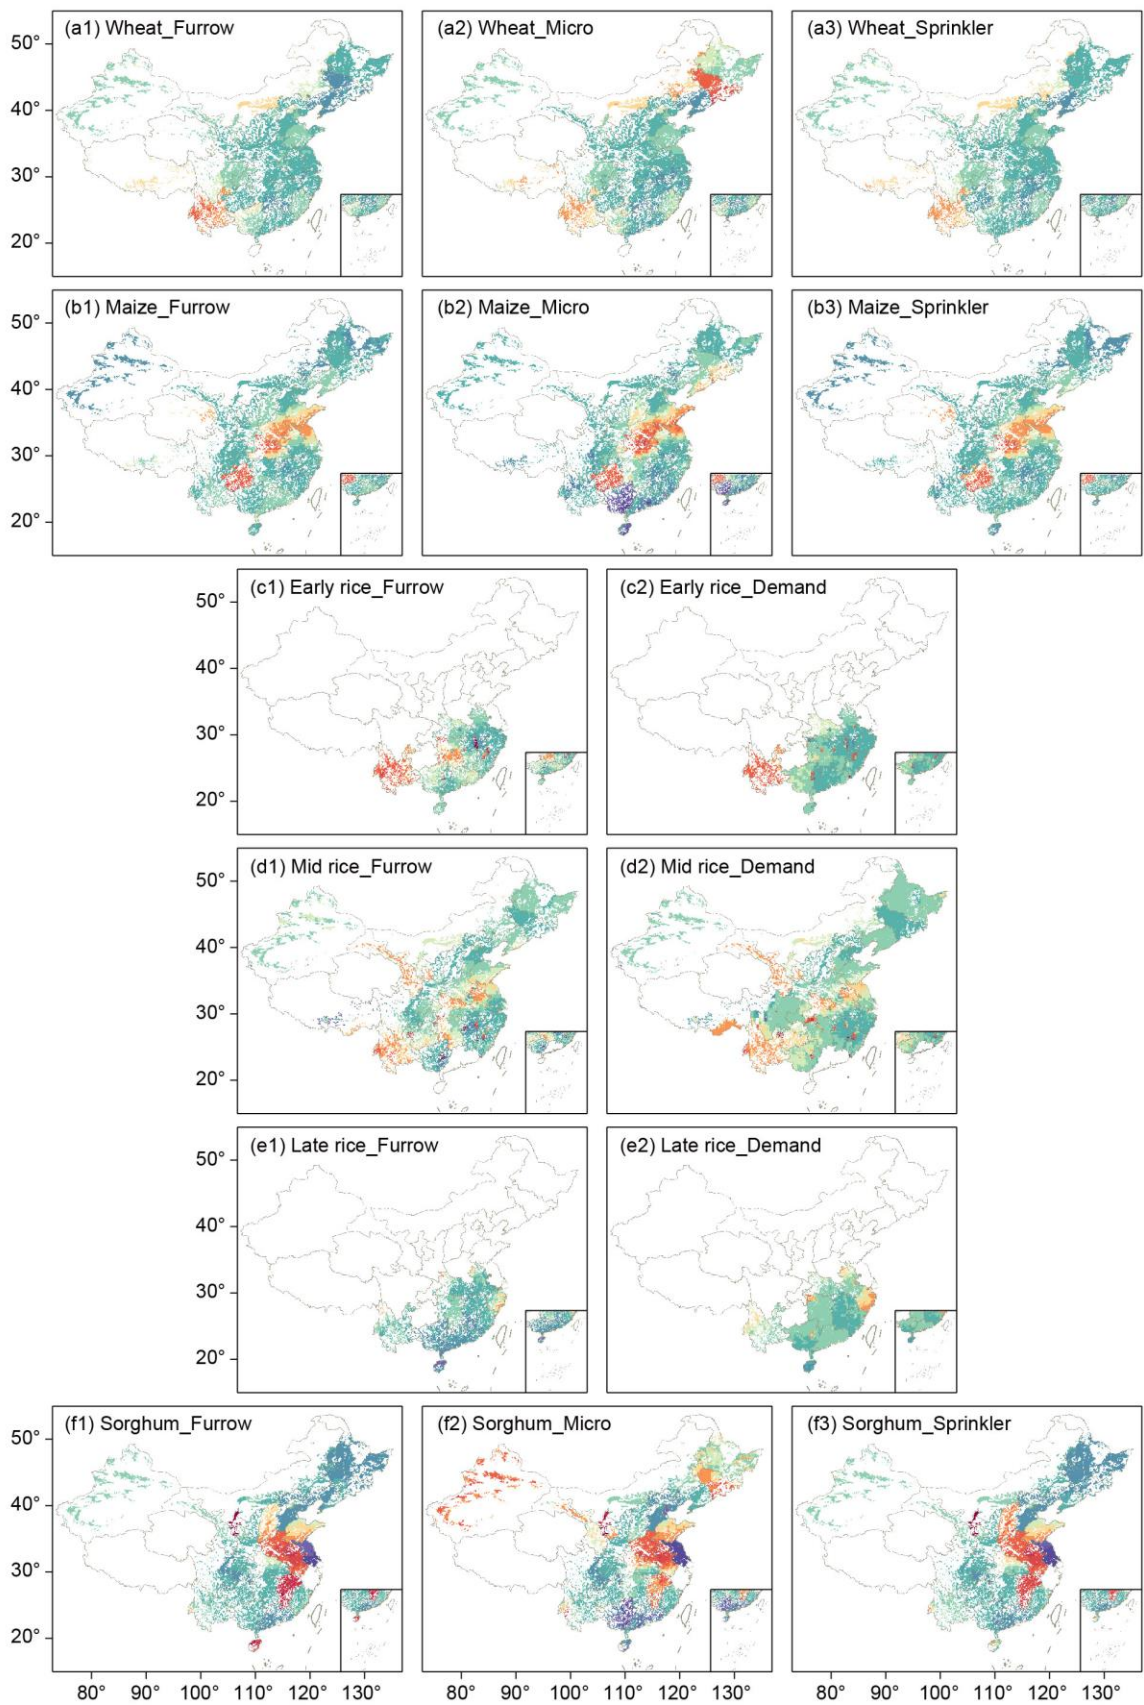

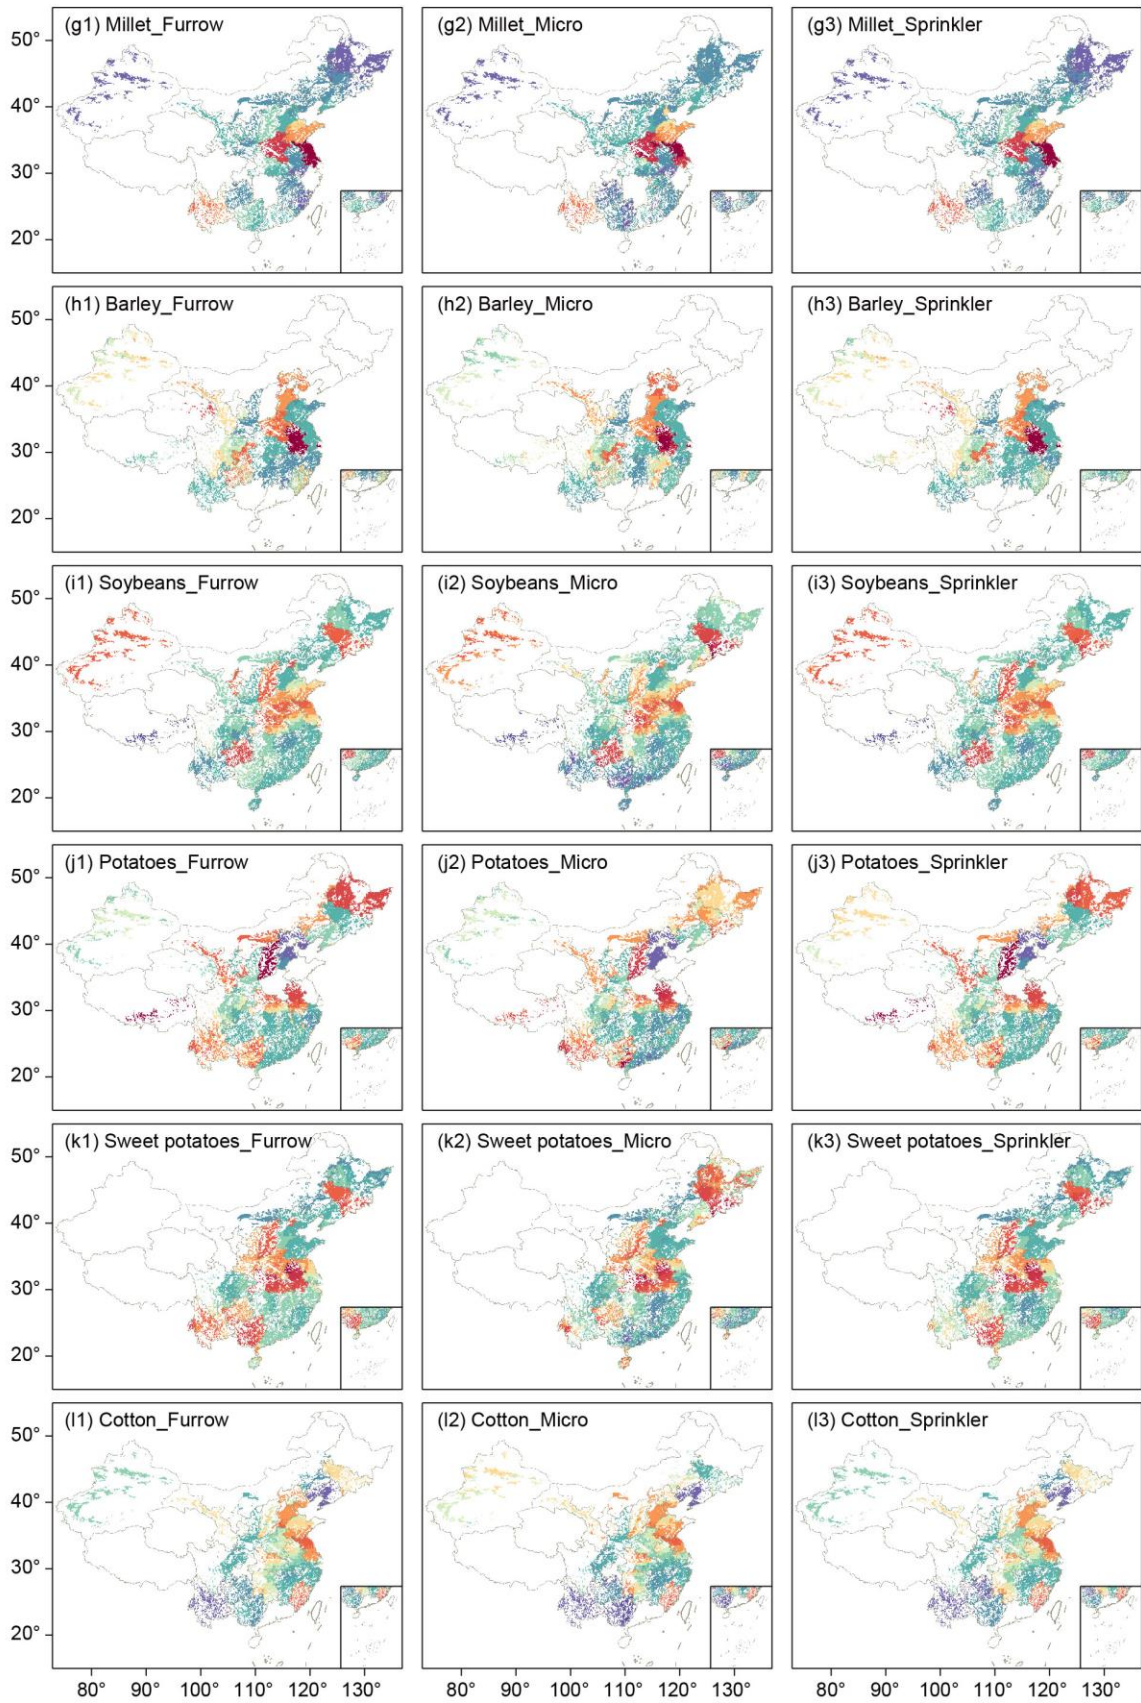

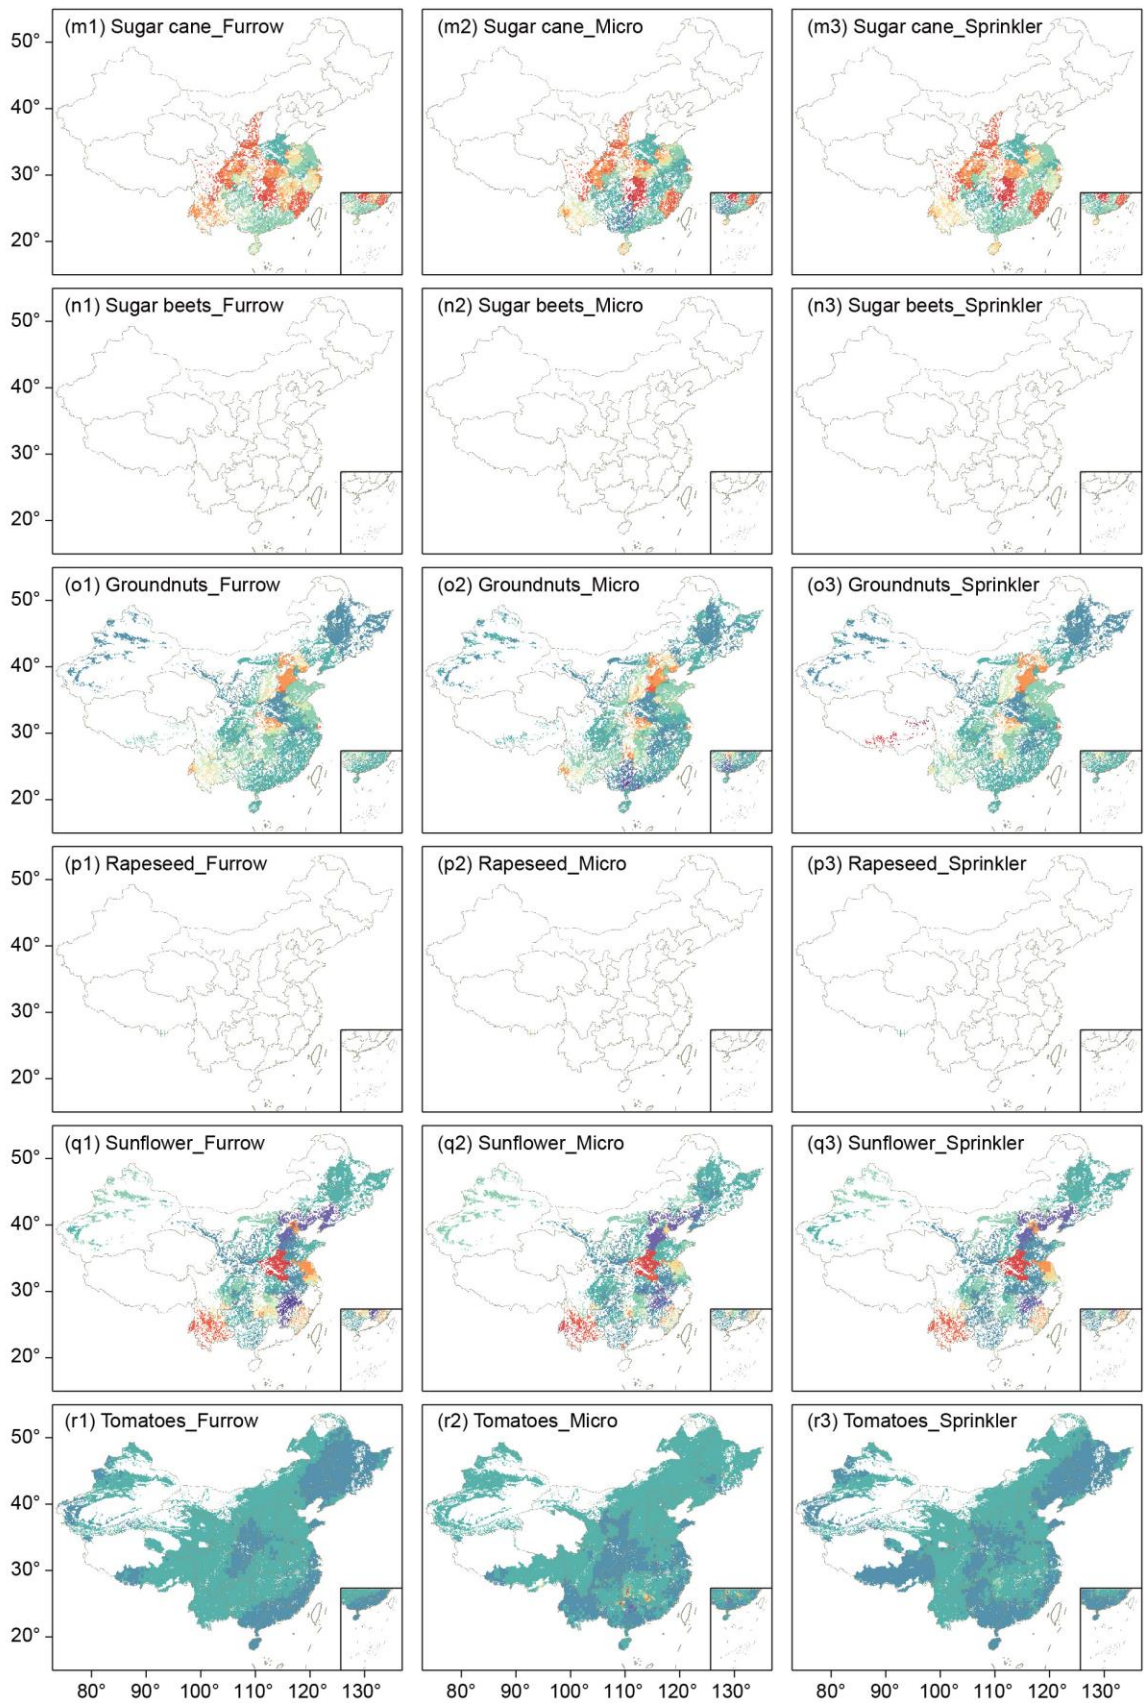

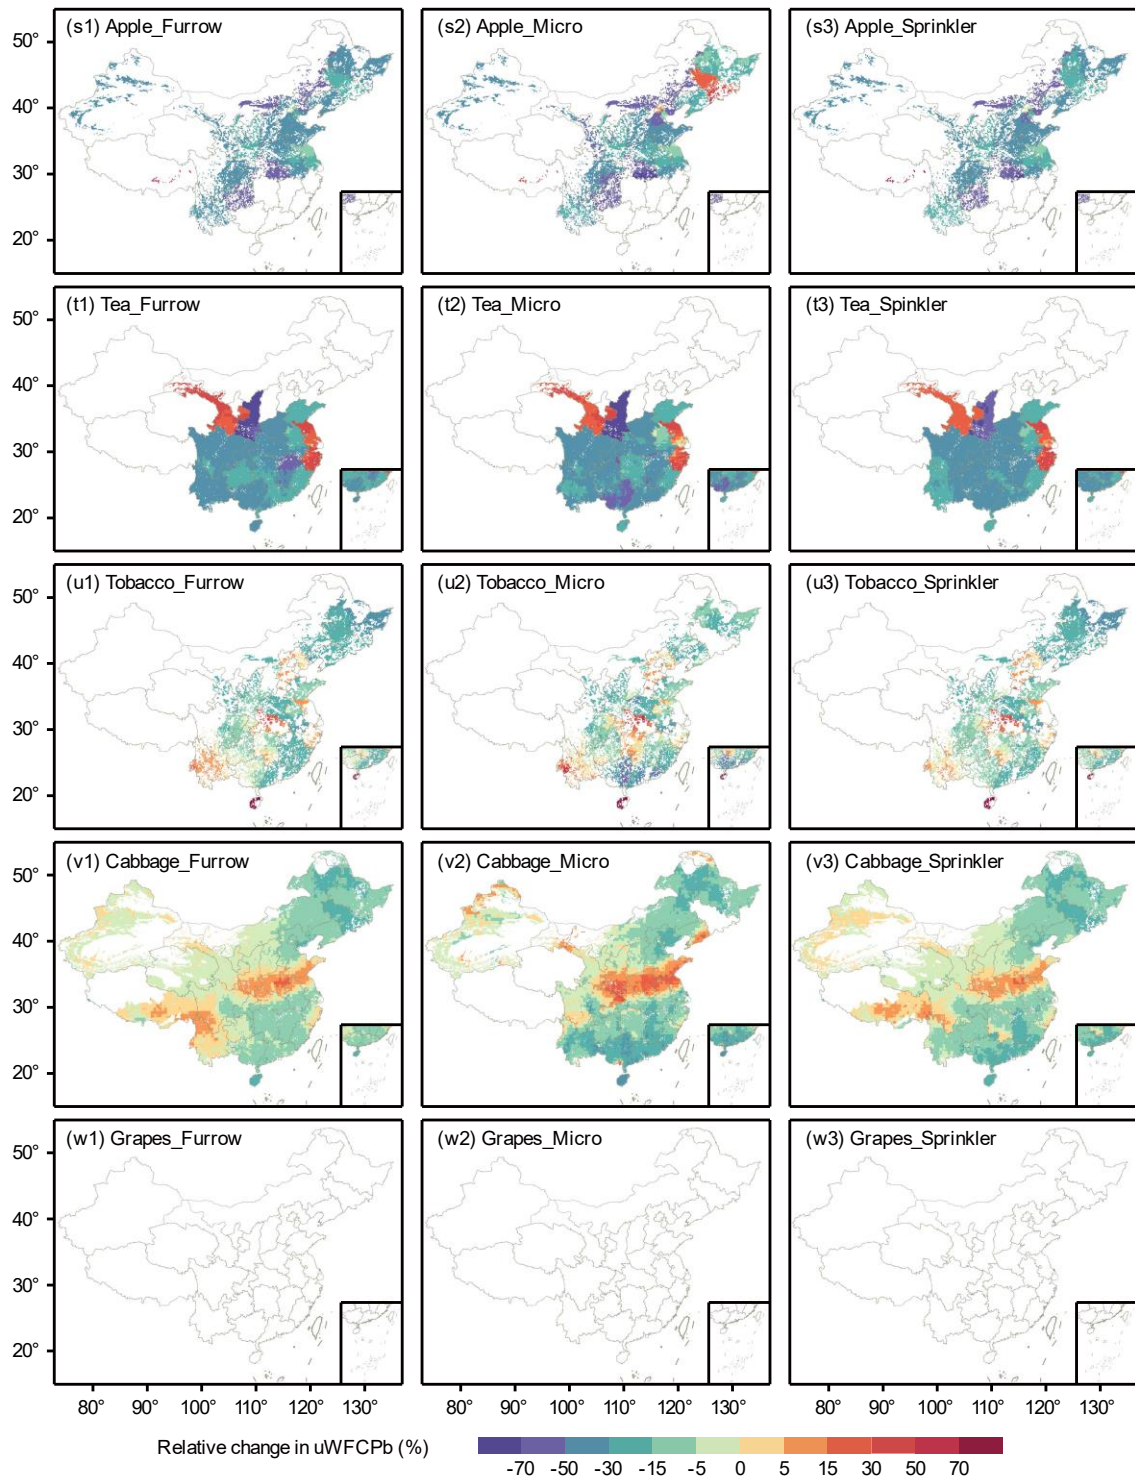

**Fig. S24** Relative changes of the average gridded uWFCPb under different water supply and irrigation practices for 2000-2009 to that for 2010-2018.

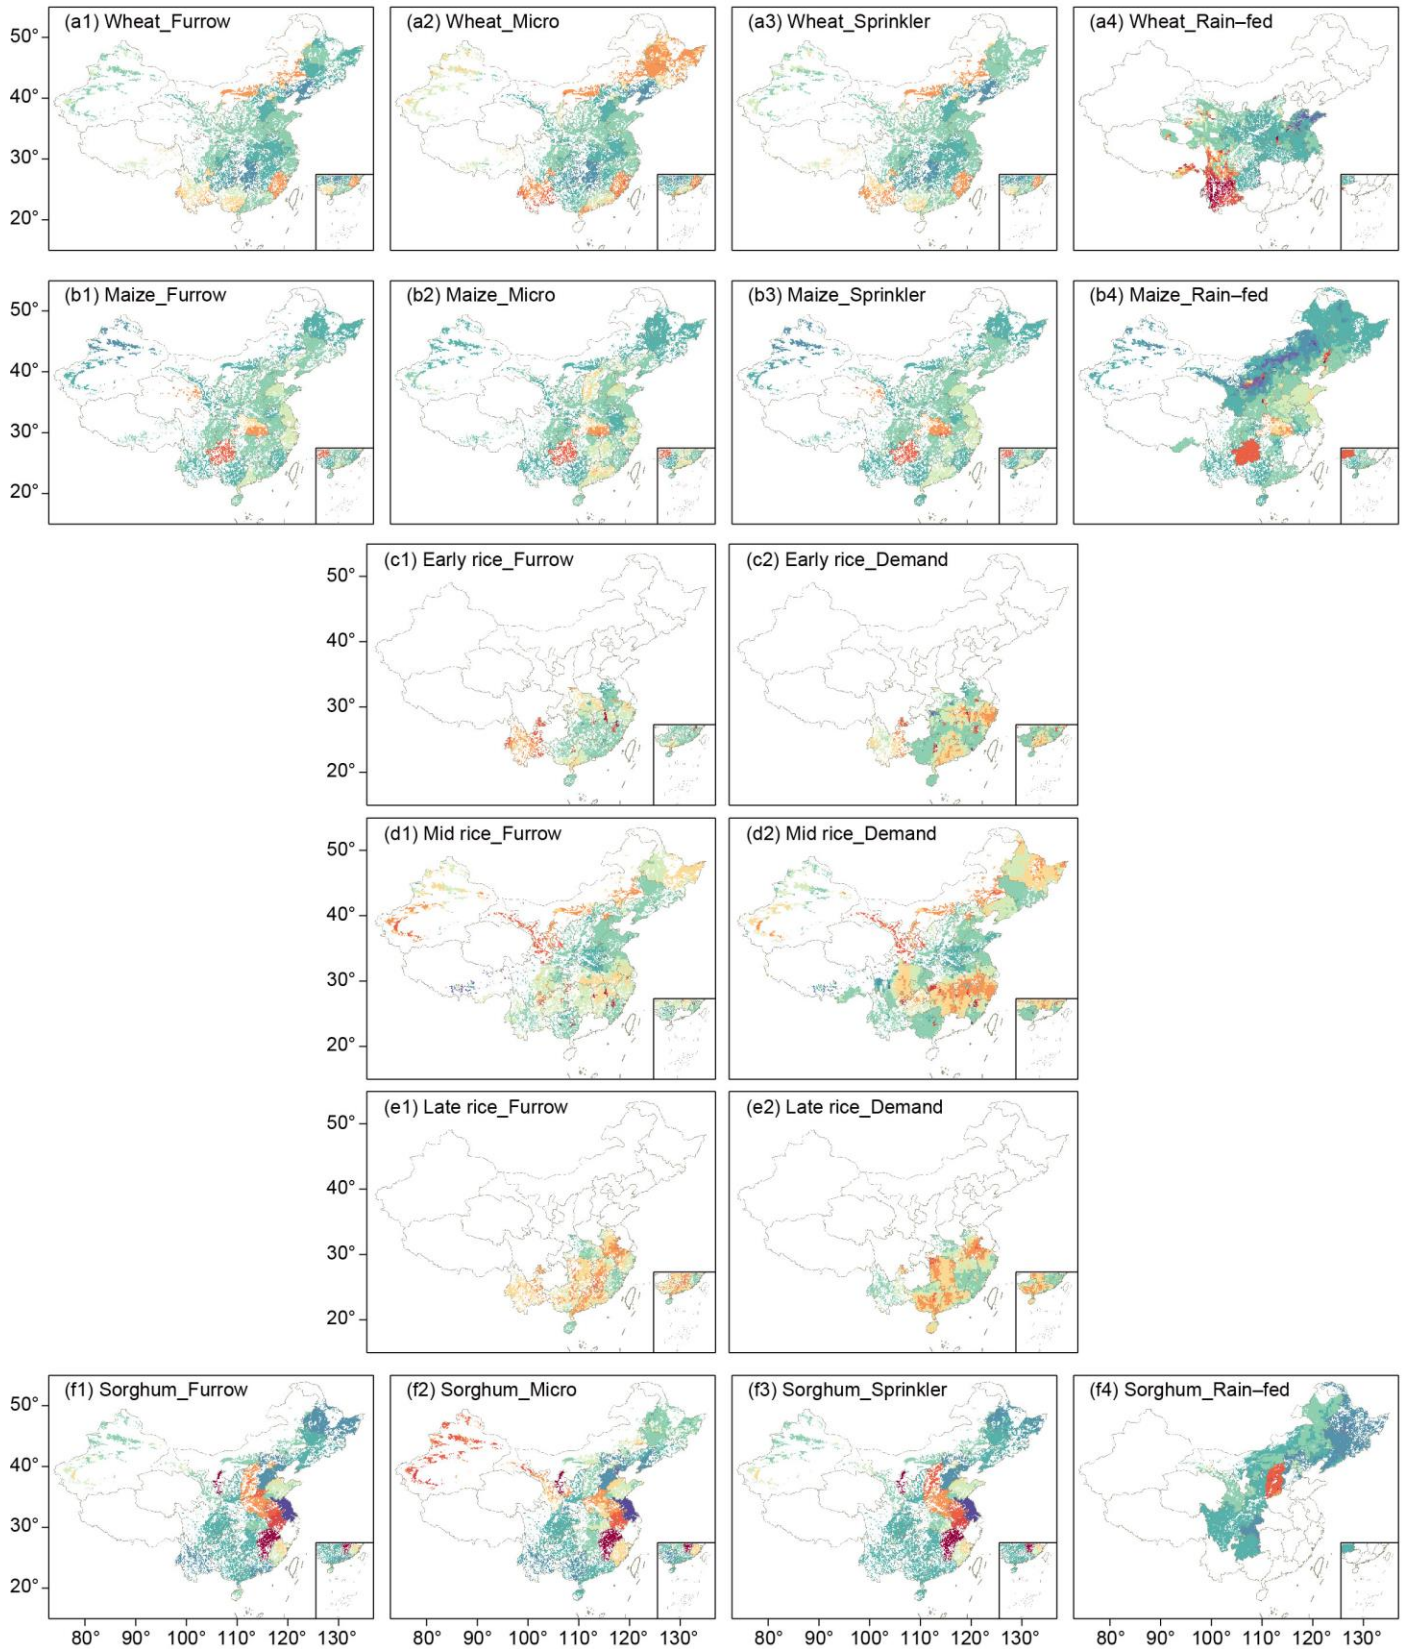



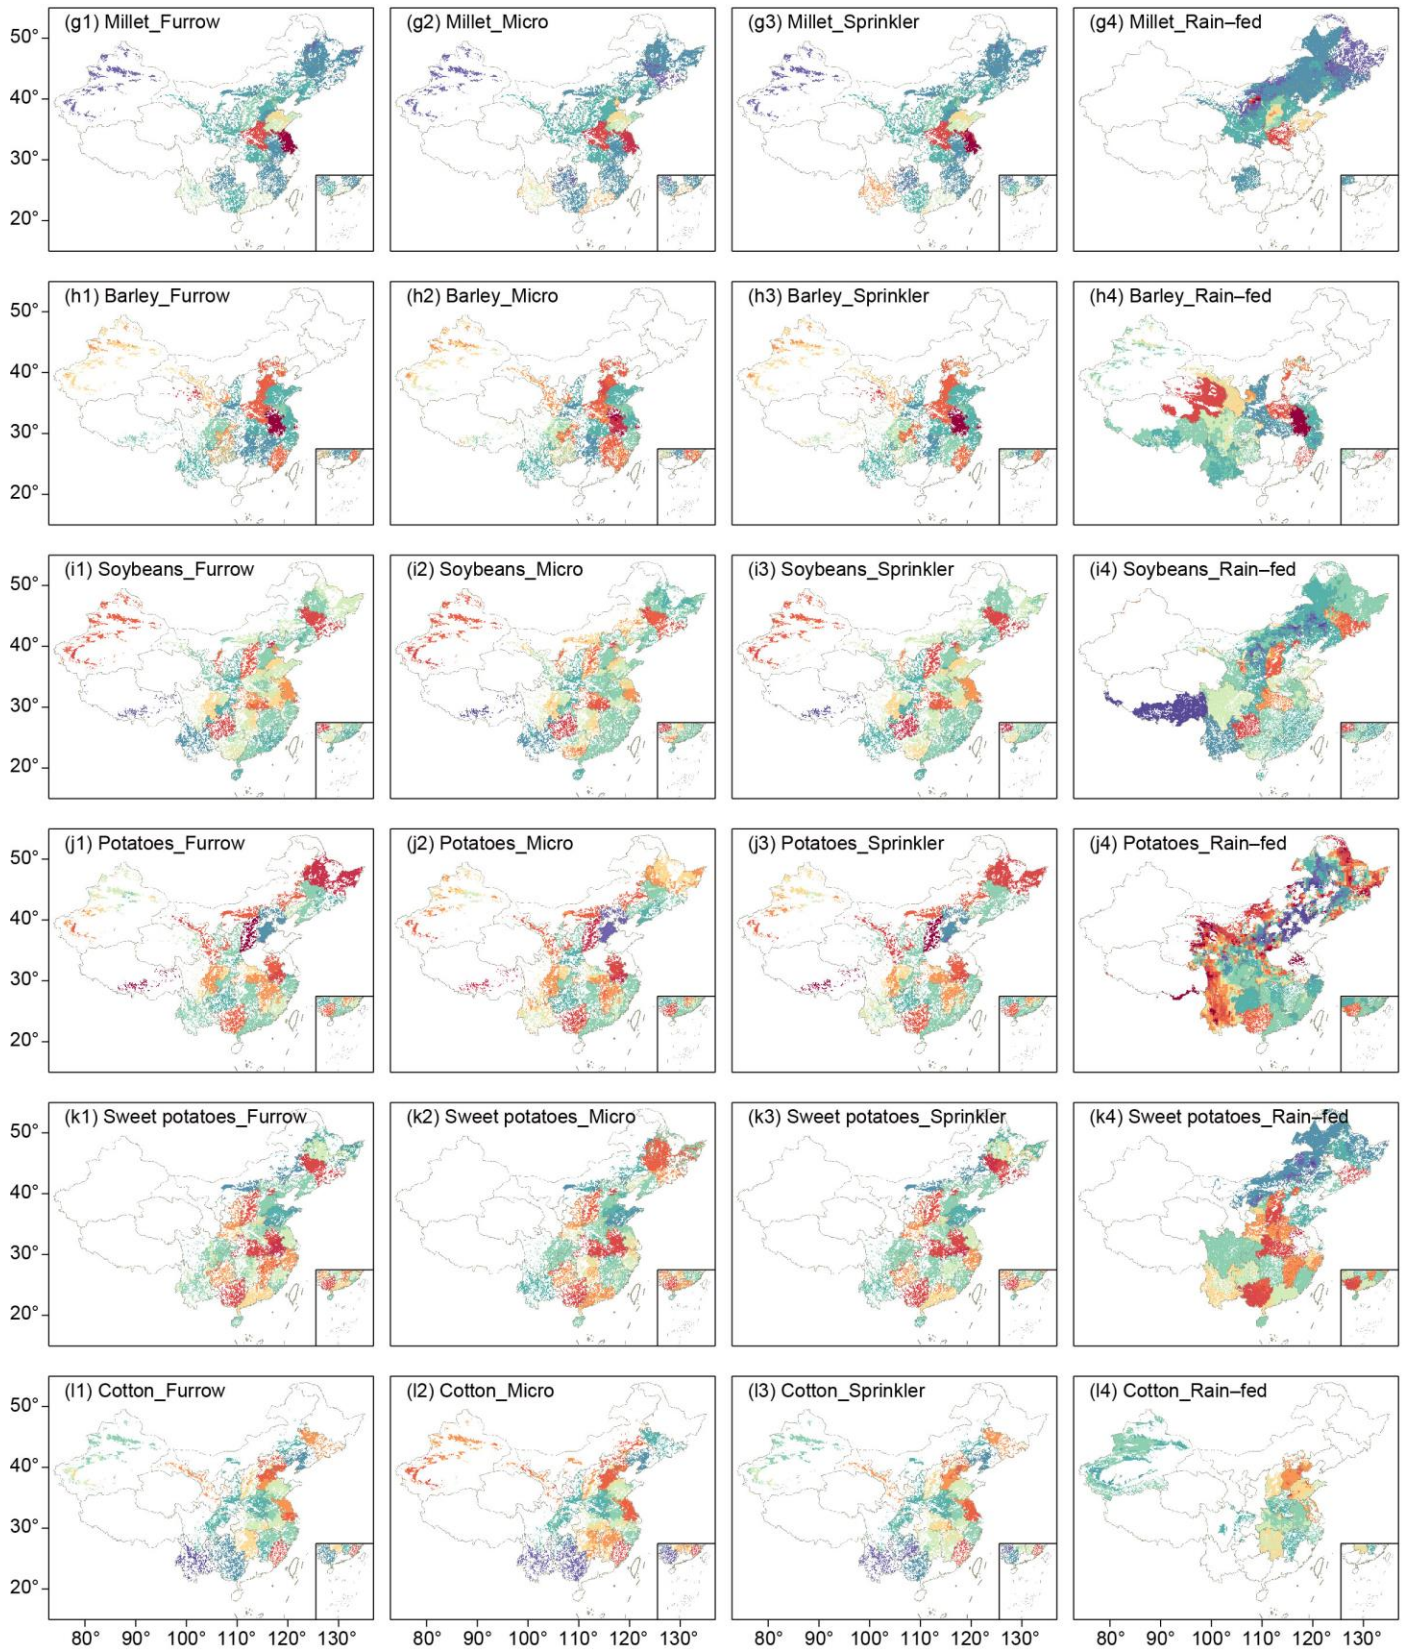

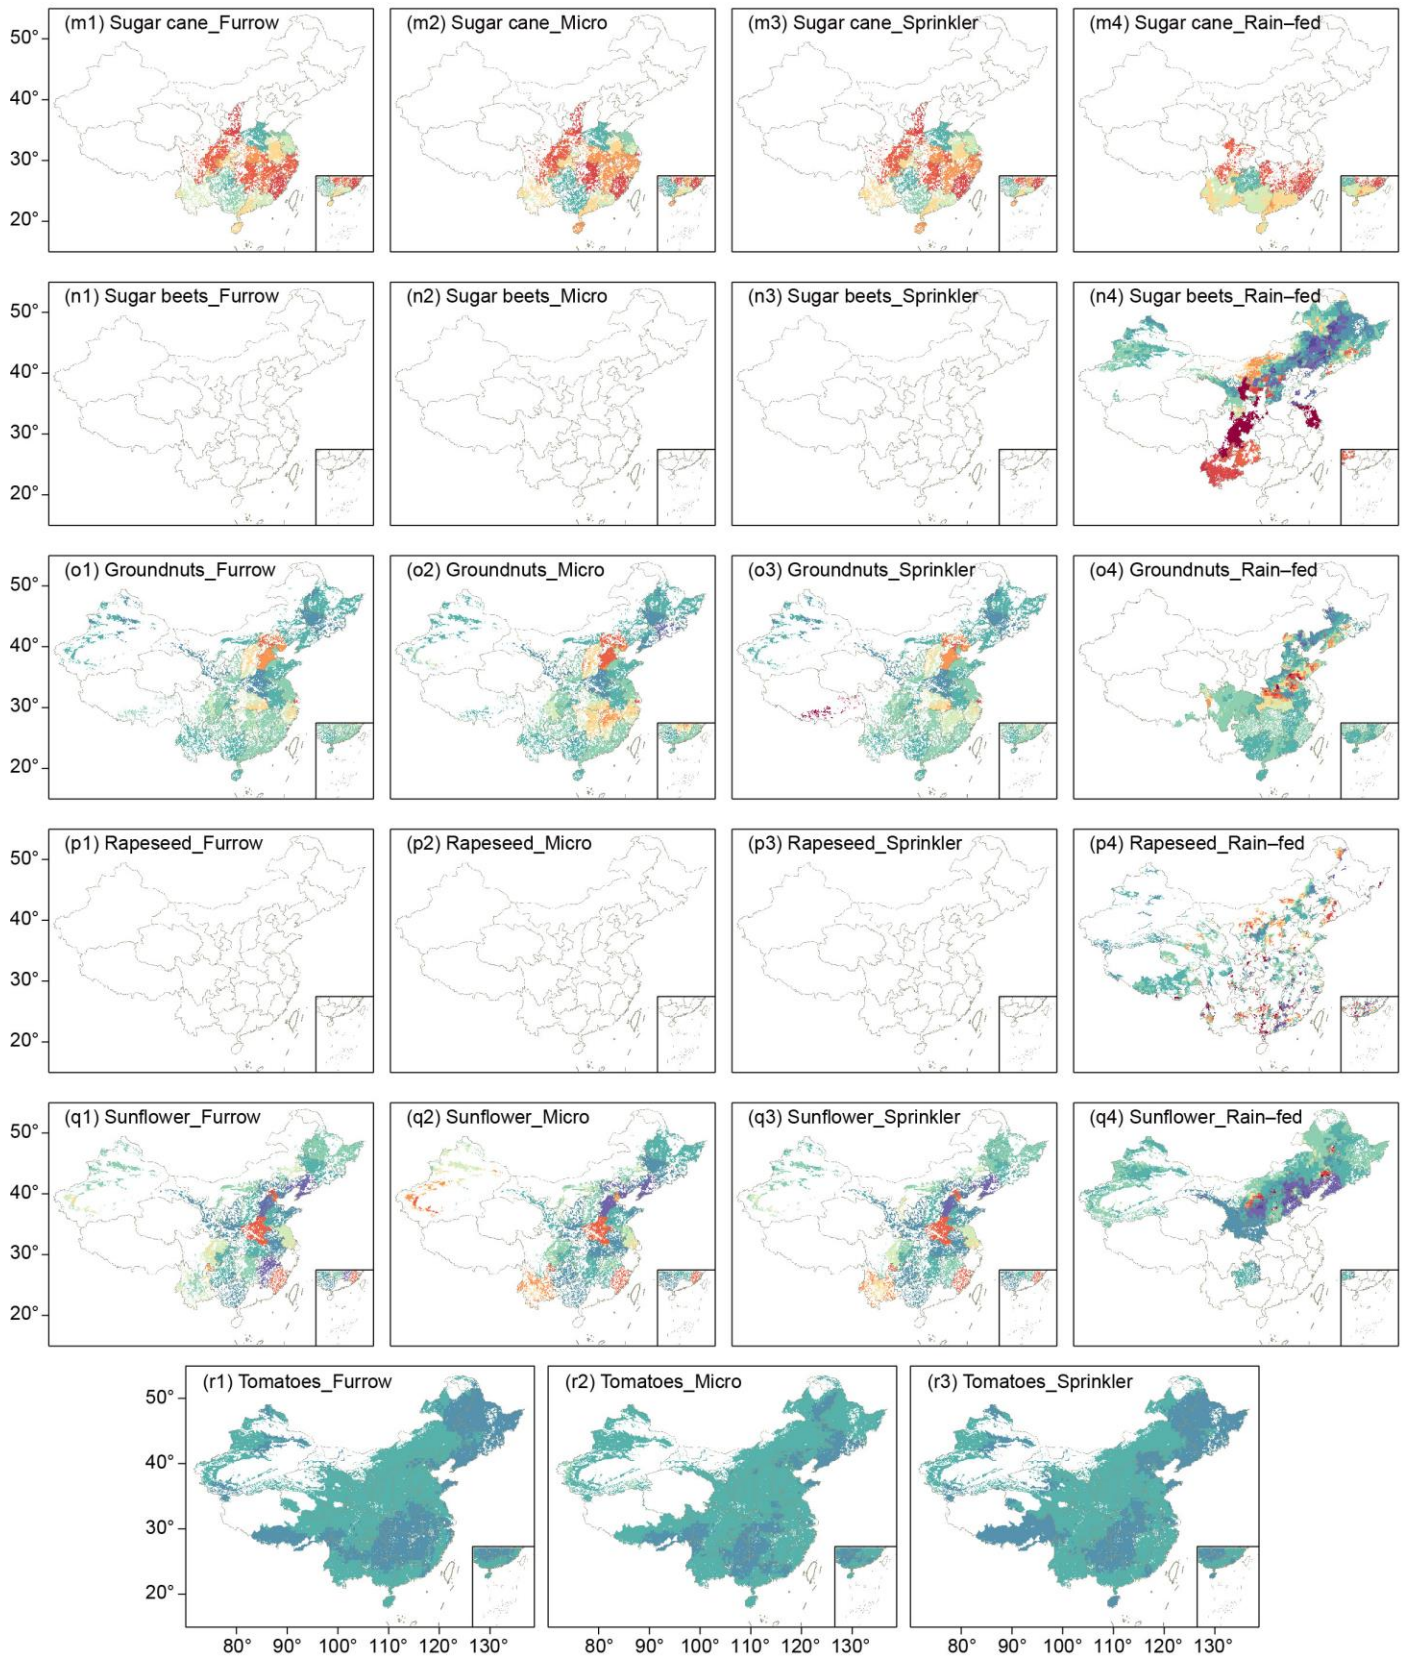

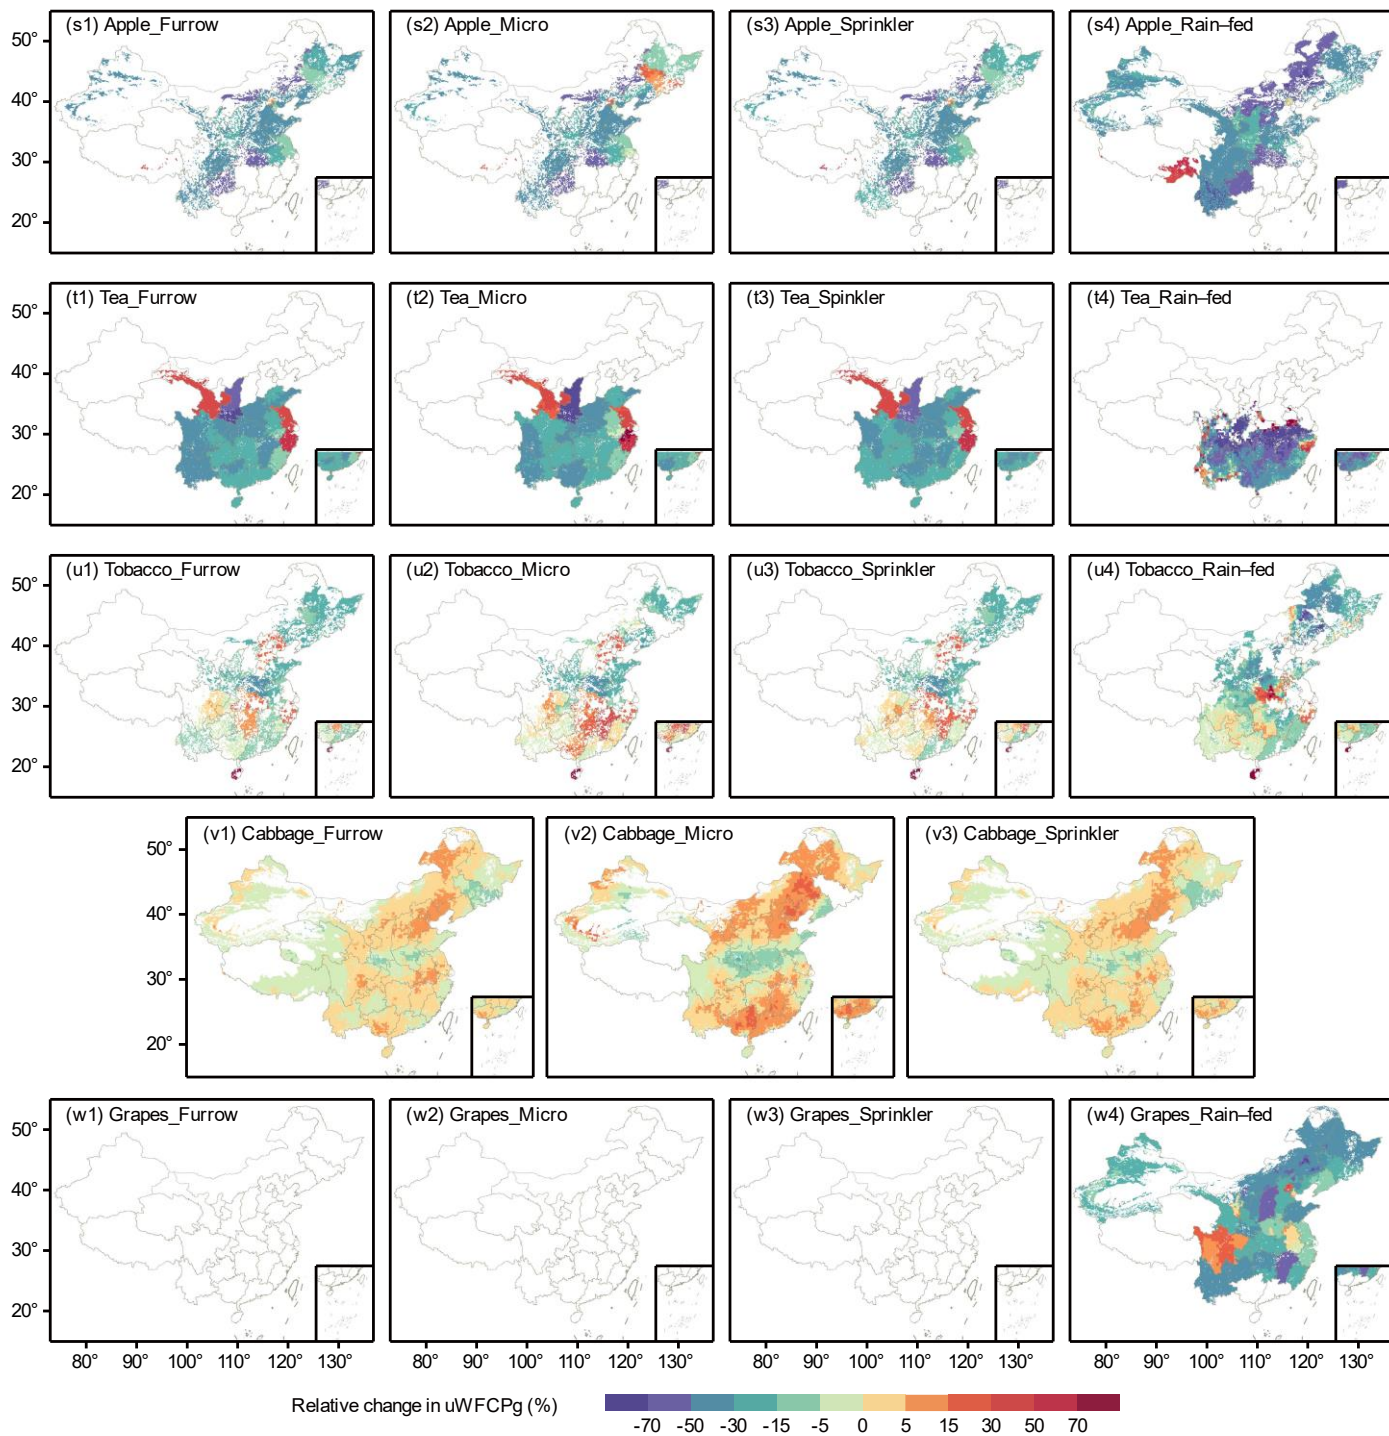

**Fig. S25** Relative changes of the average gridded uWFPCg under different water supply and irrigation practices for 2000–2009 to that for 2010–2018.

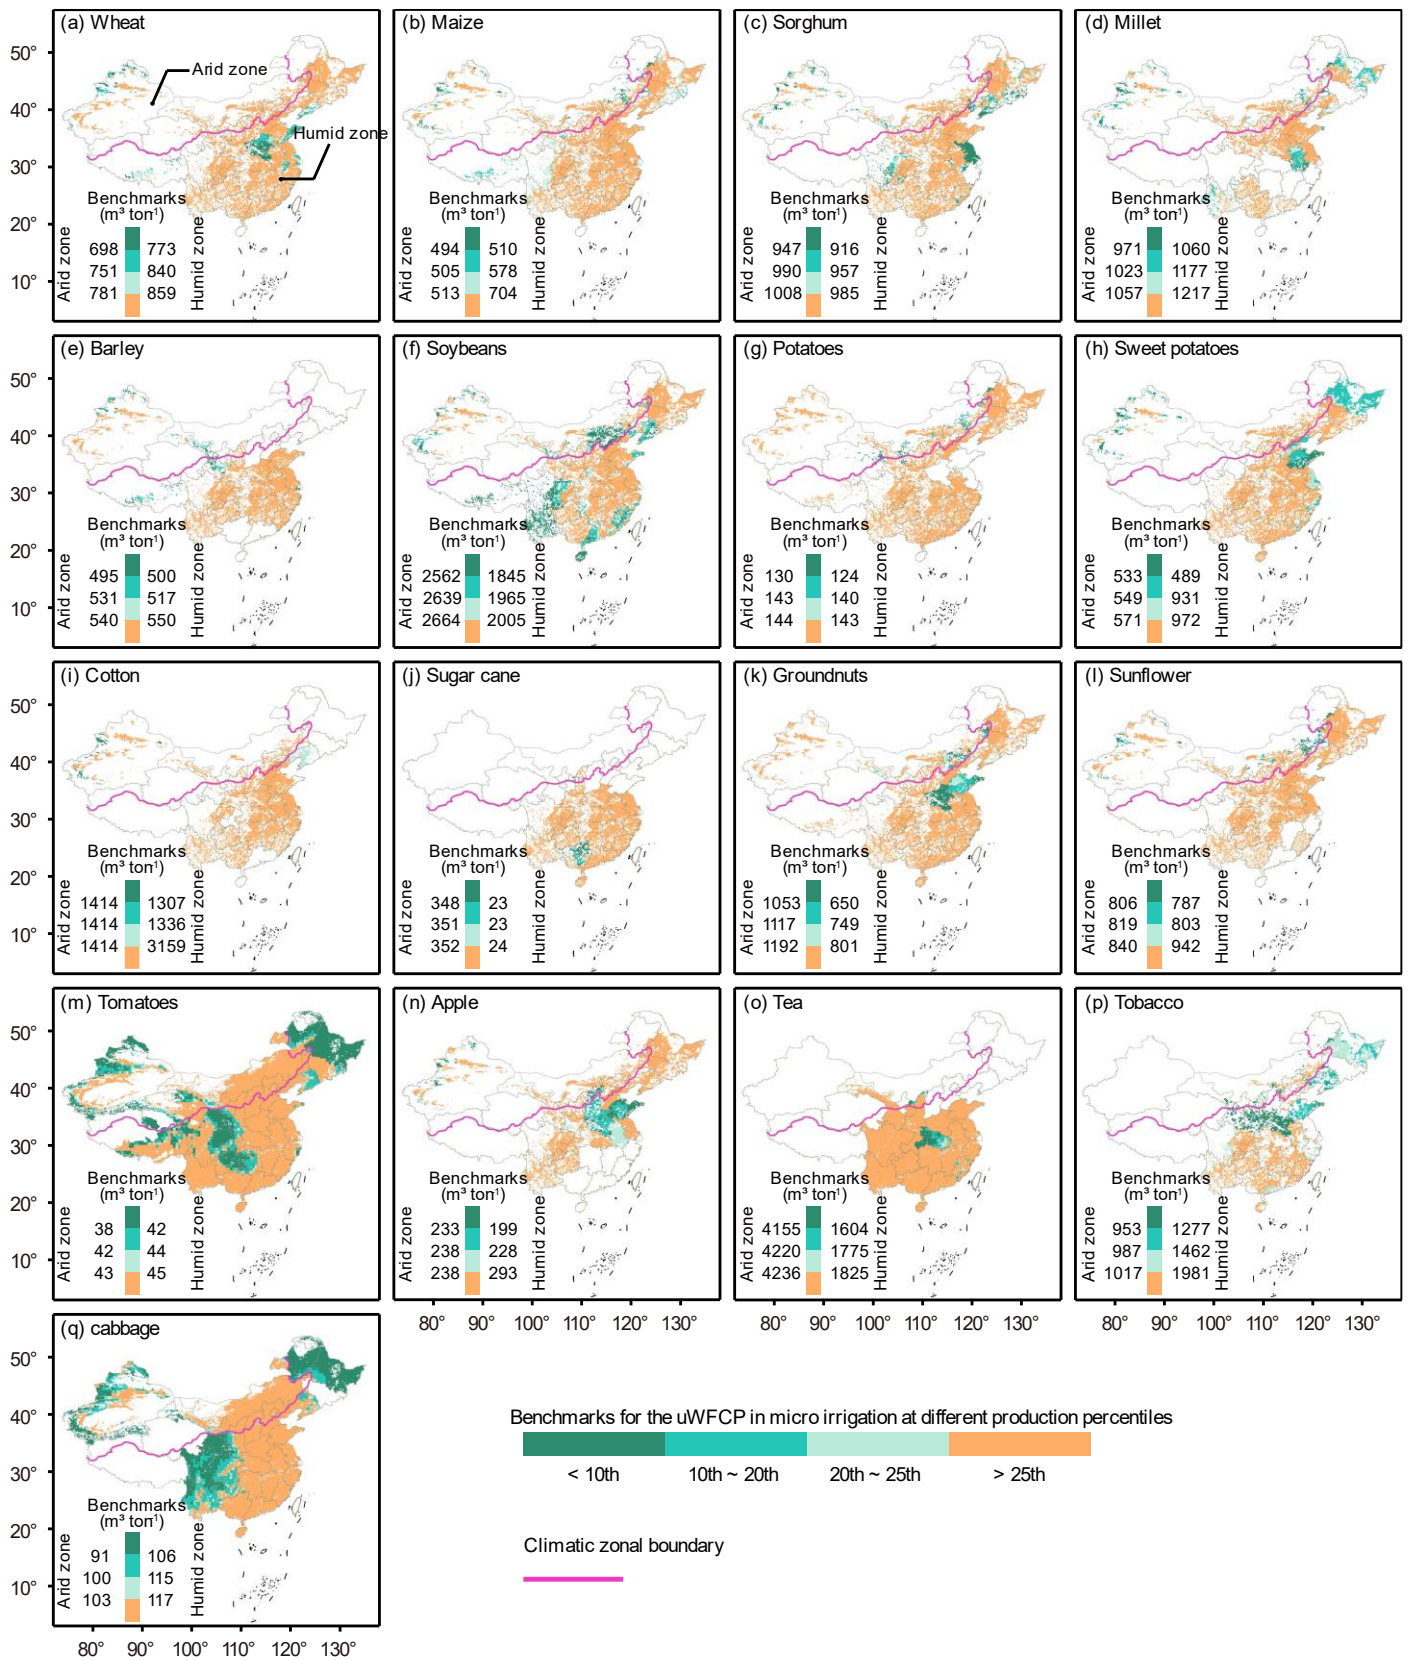

Fig. S26 Benchmarks for the uWFCP at different production percentiles under micro irrigation in China by 2018.

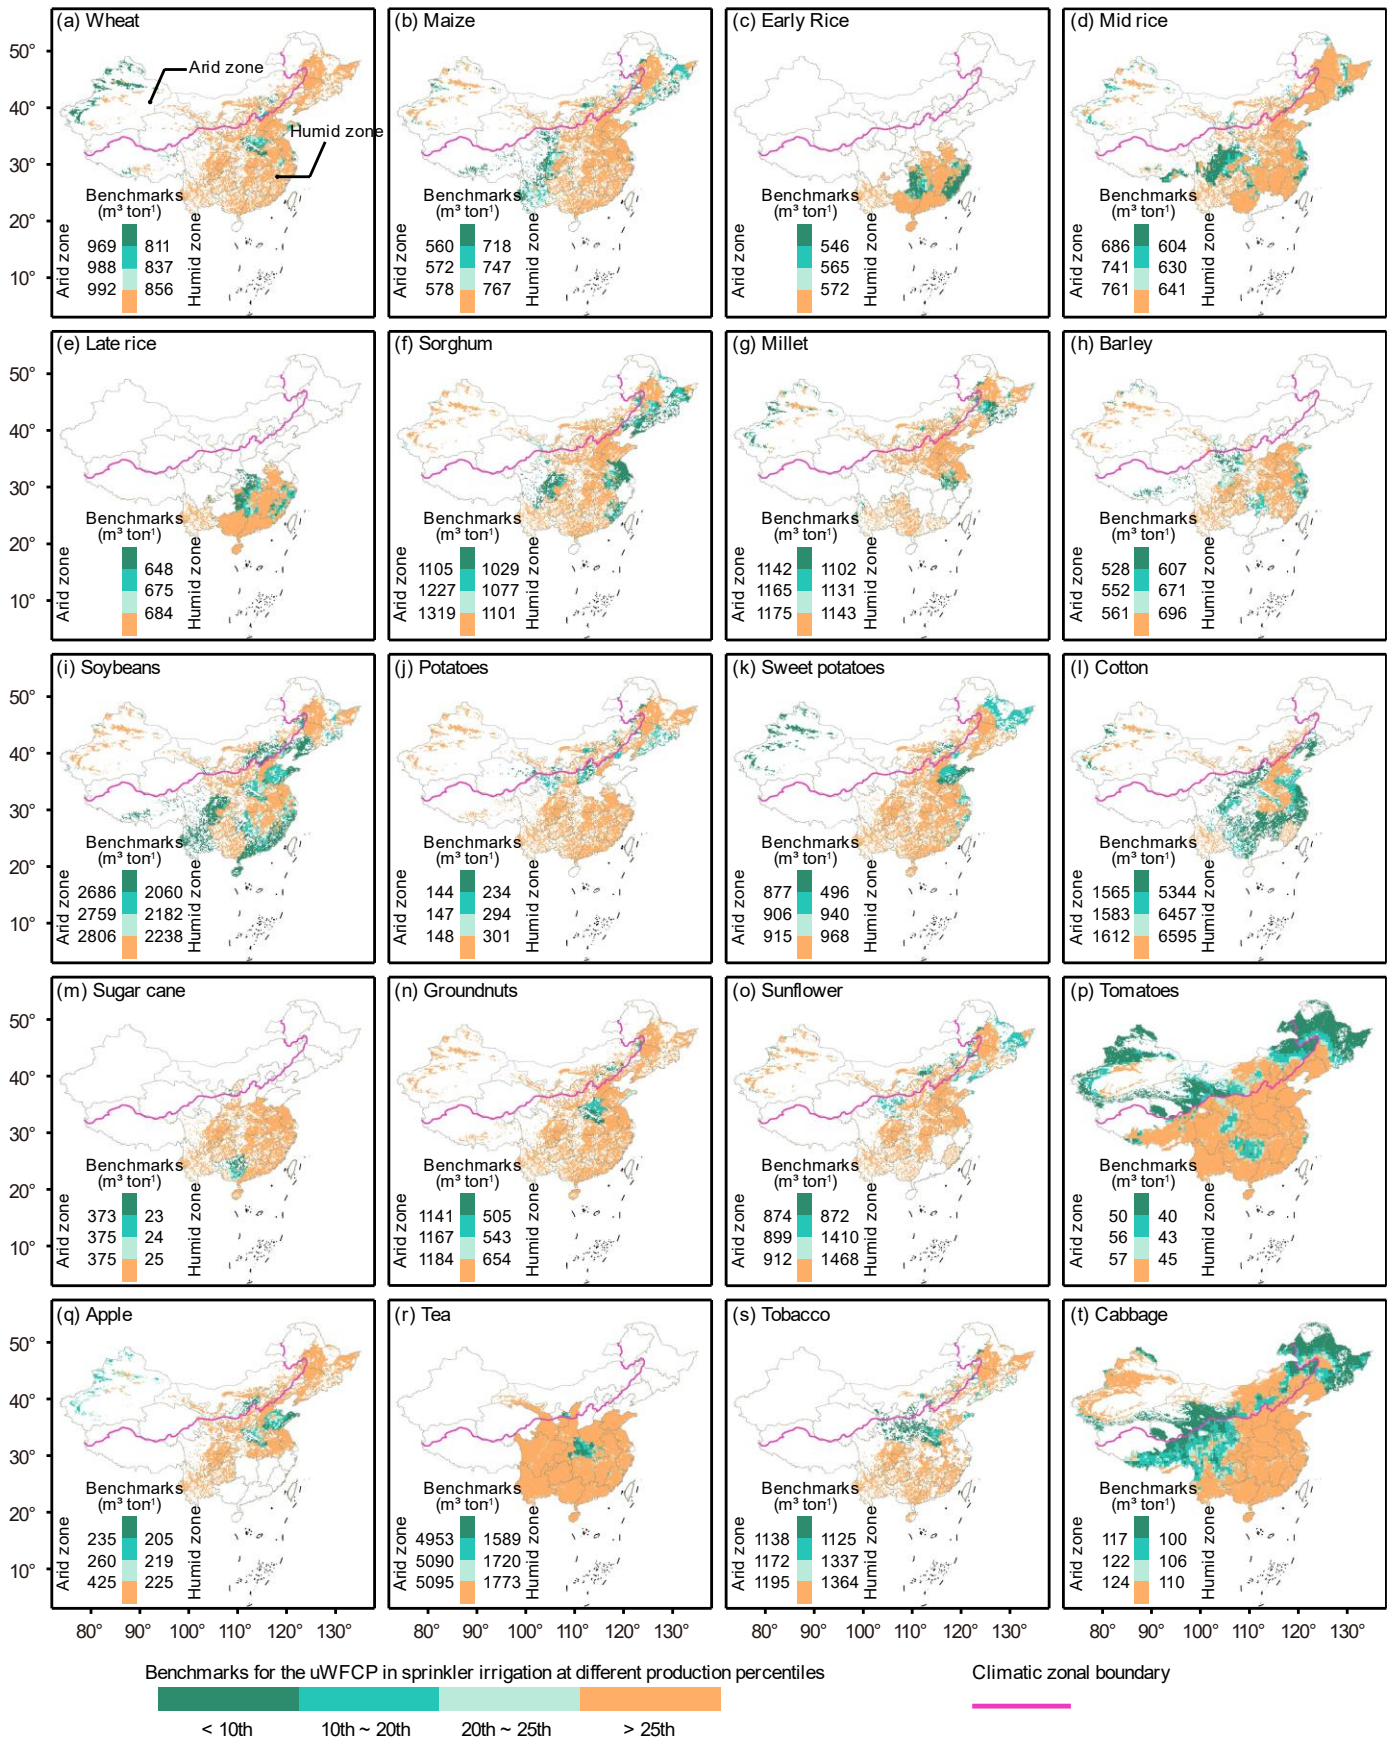

Fig. S27 Benchmarks for the uWFCP at different production percentiles under sprinkler irrigation in China by 2018.

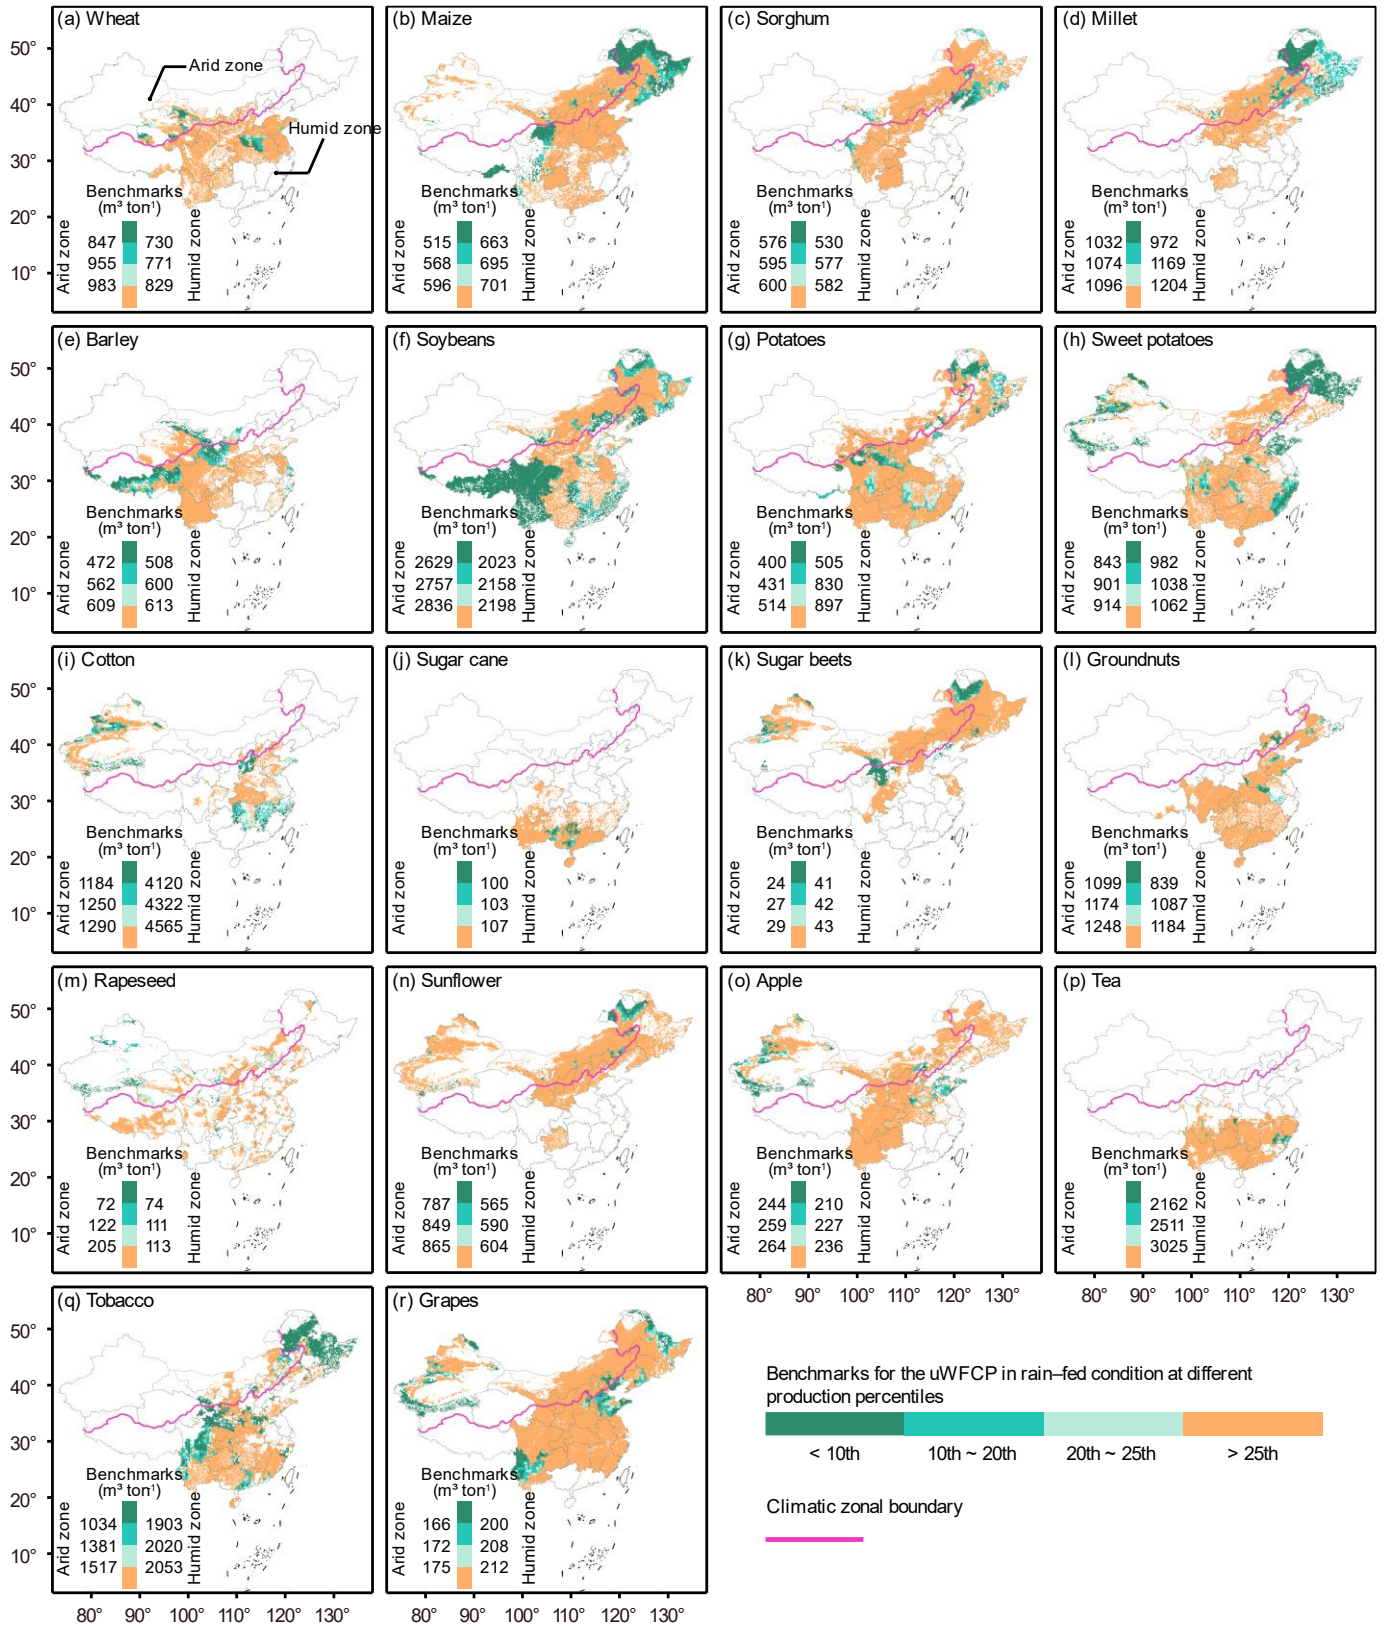

Fig. S28 Benchmarks for the uWFCP at different production percentiles under rain-fed conditions in China by 2018.
